# Supplementary material for: Acute induction of cell death-related IFN stimulated genes (ISG) differentiates highly from moderately virulent CSFV strains
Source: PubMed Central journal article supplement — Vet Res. 2009 Oct 1;41(1):07. doi: 10.1051/vetres/2009055 (PMC2775166; doi:10.1051/vetres/2009055), 2009-10-01
Supplement: vetres-41-07-s1.pdf [file vetres-41-07-s1.pdf]

Table S1. Genes which expression is modified during Eystруп infection compared to uninfected pigs. One-class SAM analysis. Values are log ratio of infected pig versus non infected pigs. DPI: Day Post Infection, Mean is the mean of the log ratio for the eight pigs (E1-E8).

| DPI | Gene Name | Oligo ID                    | Pig Number |      |      |      |       |      |      |      | Mean  |
|-----|-----------|-----------------------------|------------|------|------|------|-------|------|------|------|-------|
|     |           |                             | E1         | E2   | E3   | E4   | E5    | E6   | E7   | E8   |       |
| D1  | IFIT3     | 19897:4950_CL3Contig1:f     | 3.52       | 1.70 | 1.28 | 1.90 | 0.82  | 1.59 | 0.95 | 1.52 | 1.660 |
| D1  | IFIH1     | 6041:45360_CL586Contig1:r   | 2.70       | 1.21 | 1.30 | 1.94 | 0.61  | 1.55 | 2.17 | 1.50 | 1.622 |
| D1  | SAMD9     | 33393:5134_6863459:f        | 3.16       | 1.19 | 1.42 | 2.23 | 0.82  | 1.65 | 1.20 | 1.30 | 1.622 |
| D1  | CXCL10    | 11504:20822_CL1Contig1:f    | 3.51       | 1.41 | 1.28 | 1.82 | 0.80  | 1.59 | 1.08 | 1.44 | 1.615 |
| D1  | PARP11    | 10889:385_CL1Contig1:r      | 2.36       | 1.01 | 1.32 | 1.88 | 0.71  | 1.64 | 1.14 | 1.29 | 1.418 |
| D1  | GBP2      | 18272:28721_CL3Contig1:f    | 2.11       | 0.91 | 1.67 | 1.63 | 0.43  | 2.01 | 1.32 | 1.14 | 1.403 |
| D1  | GBP1      | 13822:28721_CL1Contig2:r    | 1.84       | 0.80 | 1.54 | 1.96 | 0.49  | 1.30 | 1.43 | 1.50 | 1.358 |
| D1  | ISG20     | NM_001005351.2              | 2.43       | 0.96 | 1.09 | 1.69 | 0.61  | 1.31 | 0.86 | 1.13 | 1.260 |
| D1  | IFI44     | 16784:18661_CL2Contig1:r    | 2.02       | 1.31 | 1.08 | 1.61 | 0.54  | 1.37 | 0.83 | 1.06 | 1.227 |
| D1  | HERC6     | 11670:35840_CL12Contig1:r   | 2.13       | 0.87 | 1.53 | 1.61 | 0.43  | 1.37 | 0.88 | 0.98 | 1.224 |
| D1  | OAS1      | 30554:6613_CL1Contig1:r     | 2.15       | 1.02 | 1.05 | 1.67 | 0.64  | 1.25 | 0.90 | 0.73 | 1.176 |
| D1  | ?         | TC225837:f                  | 0.25       | 0.80 | 1.67 | 1.87 | 0.16  | 1.75 | 1.44 | 1.29 | 1.154 |
| D1  | OAS2      | 3659:36560_CL1Contig1:f     | 2.41       | 0.85 | 1.01 | 1.38 | 0.47  | 1.05 | 0.82 | 0.84 | 1.103 |
| D1  | XAF1      | 5248:36876_CL1Contig2:r     | 2.19       | 0.94 | 0.92 | 1.29 | 0.56  | 1.29 | 0.62 | 0.65 | 1.058 |
| D1  | STAT2     | 11310:15518_CL4Contig1:f    | 1.57       | 0.75 | 0.88 | 1.62 | 0.30  | 1.45 | 0.91 | 0.92 | 1.050 |
| D1  | ?         | 15350:14257_CL1Contig1:r    | 1.99       | 0.82 | 1.35 | 1.26 | 0.27  | 1.14 | 0.75 | 0.78 | 1.045 |
| D1  | MX1       | 334:5560_CL1Contig1:r       | 2.50       | 0.85 | 0.61 | 1.26 | 0.66  | 0.83 | 0.78 | 0.83 | 1.040 |
| D1  | GVIN1     | 30427:8351_CL3Contig1:f     | 1.33       | 1.18 | 1.26 | 1.60 | 0.29  | 1.33 | 0.48 | 0.79 | 1.033 |
| D1  | SLC25A28  | 8246:7076_CL2Contig2:r      | 1.49       | 0.75 | 1.05 | 1.75 | 0.20  | 1.10 | 0.83 | 0.87 | 1.005 |
| D1  | SMCHD1    | 15469:24790_CL1Contig1:r    | 1.33       | 0.64 | 1.15 | 1.40 | 0.39  | 1.08 | 0.77 | 0.98 | 0.967 |
| D1  | LY64      | 16354:20538_C0007308m24-3:r | 1.54       | 0.68 | 0.97 | 1.35 | 0.37  | 1.15 | 0.79 | 0.80 | 0.957 |
| D1  | CASP1     | 2787:12475_CL1Contig1:r     | 1.43       | 0.62 | 0.98 | 1.31 | 0.23  | 0.96 | 1.25 | 0.87 | 0.956 |
| D1  | FCGR1A    | 9778:5621_CL2Contig2:f      | 1.18       | 0.59 | 0.84 | 1.34 | 0.48  | 1.33 | 0.98 | 0.85 | 0.949 |
| D1  | EPSTI1    | 1802:18535_CL2Contig1:f     | 1.63       | 0.53 | 0.86 | 1.42 | 0.51  | 1.05 | 0.97 | 0.57 | 0.942 |
| D1  | DNAJA1    | 11334:7676_CL1Contig3:r     | 1.46       | 0.56 | 1.01 | 1.40 | 0.27  | 1.08 | 0.58 | 1.04 | 0.926 |
| D1  | CLEC4E    | 478:45360_CL514Contig1:r    | 0.67       | 0.46 | 1.16 | 1.70 | 0.15  | 1.17 | 0.97 | 1.00 | 0.910 |
| D1  | NT5C3     | 10635:8497_CL2Contig1:f     | 0.91       | 0.30 | 0.77 | 1.63 | 0.61  | 0.88 | 1.59 | 0.55 | 0.904 |
| D1  | PARP9     | 531:2579_CL1Contig1:r       | 1.66       | 0.60 | 1.01 | 1.00 | 0.35  | 1.17 | 0.54 | 0.90 | 0.904 |
| D1  | MNDA      | 32294:3432_CL1Contig1:f     | 1.47       | 0.59 | 0.98 | 1.45 | 0.23  | 0.95 | 0.77 | 0.74 | 0.897 |
| D1  | NBN       | 2580:25557_CL1Contig1:f     | 0.67       | 0.71 | 1.14 | 1.43 | 0.00  | 1.29 | 1.03 | 0.90 | 0.896 |
| D1  | USP18     | 15714:14279_CL1Contig1:r    | 1.75       | 0.95 | 0.99 | 0.90 | 0.33  | 1.12 | 0.48 | 0.54 | 0.883 |
| D1  | ZNF313    | TC199538:f                  | 0.97       | 0.34 | 1.37 | 1.27 | -0.08 | 1.34 | 0.80 | 0.83 | 0.855 |
| D1  | PHF11     | 17473:736_CL1Contig1:r      | 1.33       | 0.55 | 0.76 | 1.61 | 0.17  | 0.92 | 0.81 | 0.56 | 0.838 |
| D1  | KYNU      | 31503:12219_CL1Contig1:f    | 0.58       | 0.83 | 0.93 | 1.22 | 0.21  | 1.13 | 0.88 | 0.90 | 0.835 |
| D1  | TRIM38    | 7353:45360_CL198Contig1:f   | 1.24       | 0.57 | 1.22 | 0.95 | 0.19  | 0.98 | 0.71 | 0.79 | 0.831 |
| D1  | CMH1      | 7267:1138_CL1Contig2:r      | 0.88       | 0.71 | 1.09 | 1.24 | -0.03 | 1.03 | 0.69 | 0.95 | 0.820 |
| D1  | NMI       | 5976:15972_CL1Contig1:r     | 1.02       | 0.80 | 0.61 | 1.74 | 0.01  | 0.95 | 0.78 | 0.60 | 0.814 |
| D1  | GGH       | 13656:5720_CL1Contig1:f     | 1.26       | 0.58 | 0.98 | 1.16 | 0.28  | 0.79 | 0.56 | 0.69 | 0.788 |
| D1  | P2RY5     | 1896:5752_CL1Contig1:r      | 1.17       | 0.25 | 1.11 | 1.10 | 0.27  | 0.93 | 0.68 | 0.67 | 0.773 |
| D1  | CHMP5     | 12490:2796_CL1Contig1:f     | 1.19       | 0.43 | 0.93 | 0.98 | 0.29  | 0.86 | 0.71 | 0.68 | 0.759 |
| D1  | HK3       | 19012:1489_CL2Contig1:f     | 1.05       | 0.42 | 1.18 | 1.26 | 0.19  | 0.97 | 0.47 | 0.50 | 0.755 |

|    |         |                             |      |      |      |      |       |      |      |      |       |
|----|---------|-----------------------------|------|------|------|------|-------|------|------|------|-------|
| D1 | LAMP2   | 17879:1544_CL1Contig1:r     | 0.48 | 0.49 | 1.09 | 1.24 | 0.04  | 1.16 | 0.81 | 0.66 | 0.746 |
| D1 | KLRF1   | 33260:45360_51353975:r      | 0.53 | 0.52 | 0.95 | 1.12 | 0.06  | 0.96 | 0.86 | 0.85 | 0.730 |
| D1 | CASP4   | 2786:12475_CL2Contig1:r     | 1.45 | 0.37 | 0.74 | 0.99 | 0.25  | 0.83 | 0.58 | 0.60 | 0.726 |
| D1 | ?       | 9096:16108_CL1Contig2:r     | 0.67 | 0.64 | 0.85 | 1.04 | 0.32  | 1.21 | 0.60 | 0.43 | 0.720 |
| D1 | CD69    | 10823:45360_C0007760d20-7:f | 0.80 | 0.29 | 0.90 | 1.08 | -0.14 | 0.99 | 0.78 | 0.98 | 0.710 |
| D1 | UBE2L6  | 2914:3285_CL2Contig1:f      | 1.95 | 0.33 | 0.64 | 1.25 | 0.44  | 0.72 | 0.85 | 0.74 | 0.709 |
| D1 | PSMA6   | 6559:7716_CL1Contig1:r      | 0.63 | 0.42 | 0.88 | 1.13 | -0.08 | 0.74 | 1.07 | 0.78 | 0.696 |
| D1 | BLNK    | 8193:9956_CL1Contig1:r      | 0.80 | 0.58 | 1.08 | 0.86 | 0.00  | 0.70 | 0.73 | 0.80 | 0.693 |
| D1 | BCL2L3  | 9750:39839_CL1Contig1:r     | 0.80 | 0.31 | 1.04 | 1.04 | 0.26  | 0.84 | 0.63 | 0.59 | 0.687 |
| D1 | PPA1    | 8677:421_CL1Contig1:f       | 0.93 | 0.36 | 0.76 | 1.22 | 0.13  | 0.84 | 0.61 | 0.57 | 0.676 |
| D1 | CCRL2   | 33938:16197_29279993:r      | 1.10 | 0.27 | 0.96 | 0.94 | 0.31  | 0.73 | 0.59 | 0.45 | 0.669 |
| D1 | ?       | TC226654:f                  | 0.80 | 0.32 | 0.84 | 0.85 | 0.13  | 0.85 | 0.82 | 0.73 | 0.667 |
| D1 | PSMA5   | 9848:12850_CL1Contig1:r     | 1.01 | 0.39 | 0.90 | 0.85 | 0.01  | 0.72 | 0.82 | 0.63 | 0.666 |
| D1 | HSP90B1 | 19037:6424_CL1Contig1:r     | 0.81 | 0.44 | 0.74 | 1.35 | 0.02  | 0.77 | 0.52 | 0.60 | 0.656 |
| D1 | RHBDL1  | 19837:2976_CL1Contig1:r     | 0.94 | 0.49 | 0.43 | 1.09 | 0.33  | 0.70 | 0.75 | 0.51 | 0.655 |
| D1 | ?       | 10519:3033_CL1Contig1:r     | 0.74 | 0.31 | 0.85 | 1.02 | 0.15  | 1.03 | 0.54 | 0.58 | 0.653 |
| D1 | MYCBP2  | 2002:12297_CL1Contig1:f     | 0.77 | 0.45 | 0.74 | 1.13 | -0.12 | 0.98 | 0.58 | 0.68 | 0.651 |
| D1 | AIFM1   | 10133:45259_CL1Contig1:r    | 0.80 | 0.25 | 1.09 | 0.98 | -0.04 | 0.85 | 0.66 | 0.62 | 0.651 |
| D1 | HSH2D   | 11991:15444_CL1Contig1:r    | 0.97 | 0.29 | 0.63 | 0.84 | 0.10  | 1.15 | 0.58 | 0.60 | 0.645 |
| D1 | CNIH4   | 3402:15321_CL1Contig1:f     | 0.31 | 0.81 | 0.76 | 0.76 | 0.00  | 0.90 | 0.94 | 0.66 | 0.643 |
| D1 | POLI    | 17239:6688_CL1Contig1:f     | 0.14 | 0.48 | 0.95 | 0.91 | 0.03  | 0.97 | 0.80 | 0.75 | 0.628 |
| D1 | ?       | 1655:2066_CL1Contig1:r      | 0.72 | 0.27 | 0.85 | 0.95 | -0.03 | 0.95 | 0.66 | 0.65 | 0.627 |
| D1 | CD55    | 14560:9903_CL1Contig2:f     | 0.63 | 0.42 | 0.72 | 1.00 | 0.00  | 0.75 | 0.49 | 0.68 | 0.586 |
| D1 | SNX2    | 12379:2886_CL2Contig1:r     | 0.38 | 0.34 | 0.92 | 0.75 | -0.01 | 0.86 | 0.74 | 0.64 | 0.578 |
| D1 | DHRS3   | 3623:13909_CL1Contig1:r     | 0.72 | 0.80 | 0.42 | 1.06 | 0.09  | 0.57 | 0.39 | 0.34 | 0.549 |
| D1 | HEXB    | 31291:9150_6853856:r        | 0.63 | 0.29 | 0.76 | 0.93 | -0.04 | 0.79 | 0.49 | 0.40 | 0.531 |
| D1 | PDE12   | 6889:8684_CL2Contig1:r      | 0.74 | 0.21 | 0.66 | 0.93 | 0.02  | 0.62 | 0.53 | 0.49 | 0.524 |
| D1 | SP140   | 5763:7416_CL1Contig1:r      | 0.88 | 0.32 | 0.53 | 0.75 | 0.03  | 0.64 | 0.42 | 0.61 | 0.523 |
| D1 | KMO     | 3491:9967_CL1Contig1:f      | 0.66 | 0.24 | 0.72 | 0.90 | -0.05 | 0.68 | 0.46 | 0.55 | 0.520 |
| D1 | FBP1    | 17278:12319_CL1Contig1:r    | 0.53 | 0.55 | 0.78 | 0.48 | -0.07 | 0.65 | 0.66 | 0.55 | 0.517 |
| D1 | ?       | TC227367:f                  | 0.27 | 0.37 | 0.81 | 0.51 | 0.02  | 0.95 | 0.55 | 0.55 | 0.504 |
| D1 | FUNDC1  | 15500:11574_CL2Contig1:r    | 0.76 | 0.18 | 0.32 | 0.76 | 0.38  | 0.51 | 0.63 | 0.48 | 0.503 |
| D1 | TOR3A   | 3253:178_CL2Contig1:r       | 0.67 | 0.17 | 0.62 | 0.91 | 0.08  | 0.59 | 0.53 | 0.46 | 0.502 |
| D1 | IPO13   | 9428:1941_CL1Contig1:r      | 0.79 | 0.20 | 0.56 | 0.63 | 0.01  | 0.73 | 0.46 | 0.58 | 0.495 |
| D1 | Nat13   | 17327:16143_C0007741a12-7:f | 0.55 | 0.13 | 0.76 | 0.51 | 0.04  | 0.49 | 0.42 | 0.61 | 0.439 |
| D1 | ?       | TC224301:f                  | 0.32 | 0.29 | 0.61 | 0.53 | 0.19  | 0.95 | 0.38 | 0.22 | 0.436 |
| D1 | SLC15A3 | 9063:4969_CL1Contig1:r      | 0.58 | 0.24 | 0.69 | 0.67 | 0.00  | 0.43 | 0.39 | 0.43 | 0.429 |
| D1 | ?       | 17879:1544_CL1Contig2-B:r   | 0.20 | 0.44 | 0.57 | 0.54 | -0.06 | 0.73 | 0.54 | 0.42 | 0.422 |
| D1 | NRG1    | 14459:6810_CL2Contig1:f     | 0.45 | 0.11 | 0.53 | 0.57 | 0.02  | 0.62 | 0.39 | 0.36 | 0.380 |
| D1 | SFRS7   | 31484:4629_CL1Contig1:f     | 0.41 | 0.30 | 0.49 | 0.60 | 0.01  | 0.43 | 0.36 | 0.30 | 0.363 |
| D1 | OPTN    | 13759:11780_CL1Contig1:r    | 0.28 | 0.52 | 0.28 | 0.44 | 0.12  | 0.49 | 0.49 | 0.12 | 0.342 |
| D1 | AIF1    | 19768:21656_CL1Contig2:f    | 0.44 | 0.36 | 0.33 | 0.50 | 0.00  | 0.37 | 0.36 | 0.35 | 0.338 |
| D1 | NAGK    | 1587:9230_CL1Contig2:f      | 0.31 | 0.45 | 0.08 | 0.59 | 0.47  | 0.17 | 0.37 | 0.20 | 0.330 |
| D1 | UBE2B   | 11762:4774_CL1Contig1:r     | 0.03 | 0.67 | 0.25 | 0.32 | 0.30  | 0.39 | 0.36 | 0.25 | 0.321 |
| D1 | NEDD8   | 10466:459_CL1Contig1:r      | 0.52 | 0.36 | 0.09 | 0.41 | 0.20  | 0.24 | 0.44 | 0.22 | 0.309 |
| D1 | SCLT1   | 16861:25949_CL1Contig1:r    | 0.48 | 0.29 | 0.51 | 0.27 | -0.01 | 0.38 | 0.25 | 0.30 | 0.308 |
| D1 | SQLRD1  | 14976:15284_CL1Contig1:f    | 0.31 | 0.23 | 0.17 | 0.62 | 0.09  | 0.29 | 0.44 | 0.25 | 0.300 |
| D1 | RSAD2   | 1355:8929_CL1Contig1:f      | 0.41 | 0.15 | 0.26 | 0.41 | 0.26  | 0.18 | 0.51 | 0.17 | 0.294 |
| D1 | SNX3    | 1514:28861_CL1Contig1:f     | 0.33 | 0.21 | 0.13 | 0.48 | 0.19  | 0.16 | 0.44 | 0.24 | 0.273 |
| D1 | TAX1BP1 | 10685:44195_CL1Contig1:r    | 0.27 | 0.15 | 0.26 | 0.48 | 0.24  | 0.13 | 0.33 | 0.26 | 0.265 |

|    |               |                          |       |       |       |       |       |       |       |       |        |
|----|---------------|--------------------------|-------|-------|-------|-------|-------|-------|-------|-------|--------|
| D1 | ALG8          | 16046:5391_CL1Contig1:f  | 0.34  | 0.13  | 0.30  | 0.31  | 0.07  | 0.43  | 0.35  | 0.09  | 0.253  |
| D1 | DERA          | 16990:19986_CL1Contig1:r | 0.17  | 0.32  | 0.13  | 0.32  | 0.21  | 0.34  | 0.41  | 0.02  | 0.240  |
| D1 | G3BP1         | 11873:16669_CL1Contig1:f | 0.41  | 0.13  | 0.24  | 0.36  | 0.09  | 0.41  | 0.11  | 0.17  | 0.238  |
| D1 | TMEM50B       | 12:5343_CL2Contig1:f     | 0.18  | 0.26  | 0.17  | 0.53  | 0.15  | 0.19  | 0.29  | 0.13  | 0.237  |
| D1 | CA1           | 18462:32_38008299:f      | 0.28  | 0.10  | 0.07  | 0.40  | 0.38  | 0.19  | 0.27  | 0.13  | 0.228  |
| D1 | ?             | 9871:25853_CL1Contig1:f  | 0.18  | 0.20  | 0.41  | 0.29  | 0.11  | 0.39  | 0.11  | 0.13  | 0.227  |
| D1 | CYP51A1       | 10523:16878_CL1Contig1:r | 0.20  | 0.25  | 0.36  | 0.33  | 0.00  | 0.23  | 0.15  | 0.22  | 0.217  |
| D1 | NVL           | 3420:22394_CL4Contig1:r  | 0.38  | 0.17  | 0.25  | 0.26  | 0.13  | 0.19  | 0.17  | 0.13  | 0.210  |
| D1 | PWP1          | 15733:24109_CL1Contig1:f | 0.18  | 0.30  | 0.01  | 0.12  | 0.13  | 0.29  | 0.26  | 0.28  | 0.196  |
| D1 | HBS1L         | 13119:6090_CL2Contig1:r  | 0.17  | 0.32  | 0.09  | 0.21  | 0.28  | 0.14  | 0.26  | 0.10  | 0.196  |
| D1 | APOOL         | 15876:16512_CL1Contig1:r | 0.27  | 0.13  | 0.17  | 0.21  | 0.20  | 0.24  | 0.03  | 0.27  | 0.190  |
| D1 | SRPK2         | 10566:11936_CL2Contig1:r | 0.13  | 0.30  | 0.15  | 0.19  | 0.13  | 0.18  | 0.29  | 0.05  | 0.177  |
| D1 | NCOA1         | TC236604:f               | 0.20  | 0.32  | 0.14  | 0.15  | 0.17  | 0.09  | 0.27  | 0.04  | 0.173  |
| D1 | TLE1          | 2051:6309_CL1Contig2:r   | 0.22  | 0.33  | 0.22  | 0.13  | 0.09  | 0.14  | 0.16  | 0.08  | 0.171  |
| D1 | PRKCSH        | 12158:2980_CL1Contig1:r  | 0.32  | 0.12  | 0.21  | 0.15  | 0.12  | 0.22  | 0.05  | 0.07  | 0.159  |
| D1 | SFRS18        | 13078:2948_CL1Contig1:f  | 0.10  | 0.10  | 0.15  | 0.23  | 0.11  | 0.29  | 0.22  | 0.06  | 0.157  |
| D1 | MEFG1         | 15951:5381_CL1Contig1:f  | 0.14  | 0.14  | 0.14  | 0.20  | 0.15  | 0.22  | 0.14  | 0.12  | 0.156  |
| D1 | TST           | 10729:1721_CL1Contig1:r  | 0.15  | 0.21  | 0.07  | 0.19  | 0.05  | 0.22  | 0.20  | 0.10  | 0.148  |
| D1 | MSH6          | 1648:23787_CL1Contig1:f  | 0.08  | 0.20  | 0.17  | 0.08  | 0.16  | 0.22  | 0.17  | 0.09  | 0.145  |
| D1 | ROPN1B        | 6315:13232_CL1Contig1:r  | 0.04  | 0.08  | 0.14  | 0.23  | 0.14  | 0.14  | 0.20  | 0.11  | 0.135  |
| D1 | TBX3          | 17507:32212_CL3Contig1:r | 0.16  | 0.13  | 0.04  | 0.21  | 0.06  | 0.17  | 0.13  | 0.10  | 0.125  |
| D1 | ?             | TC214330:f               | 0.18  | 0.06  | 0.08  | 0.14  | 0.04  | 0.21  | 0.15  | 0.08  | 0.116  |
| D1 | DUOX1         | 592:5322_CL1Contig1:f    | -0.15 | -0.12 | -0.10 | -0.04 | -0.03 | -0.10 | -0.12 | -0.14 | -0.100 |
| D1 | ?             | 3326:28459_CL1Contig1:r  | -0.14 | -0.10 | -0.21 | -0.08 | -0.05 | -0.09 | -0.16 | -0.11 | -0.118 |
| D1 | UNC84A        | 34902:35758_13660041:f   | -0.06 | -0.18 | -0.09 | -0.19 | -0.23 | -0.13 | -0.12 | -0.09 | -0.137 |
| D1 | CYB561D1      | 9844:10285_40409713:f    | -0.17 | -0.18 | -0.10 | -0.18 | -0.02 | -0.17 | -0.24 | -0.13 | -0.148 |
| D1 | DKFZp781N1041 | 34329:2517_33291376:f    | -0.06 | -0.20 | -0.11 | -0.19 | -0.19 | -0.15 | -0.21 | -0.10 | -0.150 |
| D1 | ?             | TC205460:f               | -0.18 | -0.13 | -0.10 | -0.21 | -0.15 | -0.11 | -0.09 | -0.23 | -0.150 |
| D1 | ?             | 34339:9365_12010298:r    | -0.07 | -0.14 | -0.14 | -0.15 | -0.26 | -0.10 | -0.20 | -0.14 | -0.150 |
| D1 | LPCAT3        | 20058:5817_CL1Contig1:r  | -0.10 | -0.13 | -0.15 | -0.15 | -0.23 | -0.19 | -0.09 | -0.21 | -0.156 |
| D1 | ?             | TC214444:r               | -0.13 | -0.23 | -0.24 | -0.14 | -0.17 | -0.03 | -0.25 | -0.12 | -0.164 |
| D1 | SSR2          | 9637:13197_CL1Contig2:r  | -0.11 | -0.24 | -0.10 | -0.10 | -0.28 | -0.21 | -0.09 | -0.22 | -0.169 |
| D1 | ?             | TC237092:f               | -0.13 | -0.23 | -0.14 | -0.30 | -0.21 | -0.14 | -0.12 | -0.12 | -0.174 |
| D1 | TESC          | 4020:12477_CL19Contig1:f | -0.18 | -0.20 | -0.14 | -0.18 | -0.18 | -0.14 | -0.28 | -0.12 | -0.177 |
| D1 | GPAA1         | 19267:27482_CL1Contig1:f | -0.13 | -0.12 | -0.12 | -0.23 | -0.14 | -0.16 | -0.27 | -0.25 | -0.178 |
| D1 | MRPS24        | 16348:159_CL1Contig1:r   | -0.11 | -0.37 | -0.12 | -0.18 | -0.19 | -0.26 | -0.20 | -0.09 | -0.190 |
| D1 | GFER          | 19813:14352_CL1Contig2:f | -0.25 | -0.22 | -0.07 | -0.18 | -0.13 | -0.29 | -0.32 | -0.11 | -0.197 |
| D1 | PNKD          | 5714:27971_CL1Contig3:r  | -0.14 | -0.32 | -0.30 | -0.13 | -0.27 | -0.12 | -0.22 | -0.16 | -0.207 |
| D1 | ?             | 15923:34433_9017132:f    | -0.01 | -0.27 | -0.17 | -0.26 | -0.25 | -0.14 | -0.31 | -0.25 | -0.208 |
| D1 | SBSN          | 33911:29637_CL1Contig1:r | -0.10 | -0.23 | -0.29 | -0.36 | -0.06 | -0.15 | -0.25 | -0.22 | -0.208 |
| D1 | ZCCHC11       | 9334:4571_CL2Contig1:r   | -0.21 | -0.25 | -0.06 | -0.19 | -0.15 | -0.16 | -0.28 | -0.37 | -0.209 |
| D1 | RPLP0         | 3676:11285_CL1Contig1:r  | -0.10 | -0.31 | -0.19 | -0.19 | -0.18 | -0.29 | -0.26 | -0.22 | -0.218 |
| D1 | BOLA2         | 7965:11739_7325594:f     | -0.21 | -0.29 | -0.18 | -0.32 | -0.31 | -0.27 | -0.12 | -0.15 | -0.231 |
| D1 | DALRD3        | 18780:10105_CL1Contig3:f | -0.13 | -0.30 | -0.22 | -0.30 | -0.40 | -0.21 | -0.32 | -0.03 | -0.239 |
| D1 | ?             | 1858:7077_CL1Contig1:f   | -0.07 | -0.38 | -0.20 | -0.36 | -0.31 | -0.30 | -0.22 | -0.10 | -0.243 |
| D1 | PDE9A         | 320:9677_CL1Contig2:f    | -0.17 | -0.26 | -0.14 | -0.36 | -0.12 | -0.44 | -0.25 | -0.25 | -0.249 |
| D1 | FAM113A       | 34613:30988_CL1Contig1:r | -0.14 | -0.19 | -0.25 | -0.32 | -0.20 | -0.35 | -0.27 | -0.28 | -0.250 |
| D1 | ELMO3         | 4565:2475_CL1Contig1:f   | -0.17 | -0.25 | -0.19 | -0.26 | -0.20 | -0.10 | -0.51 | -0.34 | -0.253 |
| D1 | POLR1D        | 1947:9392_CL1Contig1:r   | -0.17 | -0.32 | -0.13 | -0.28 | -0.35 | -0.45 | -0.22 | -0.14 | -0.258 |
| D1 | UBL4A         | 10196:9227_CL1Contig1:f  | -0.29 | -0.48 | -0.30 | -0.23 | -0.38 | -0.25 | -0.13 | -0.10 | -0.270 |

|    |               |                             |       |       |       |       |       |       |       |       |        |
|----|---------------|-----------------------------|-------|-------|-------|-------|-------|-------|-------|-------|--------|
| D1 | FEM1B         | 812:14912_CL1Contig1:f      | -0.18 | -0.42 | -0.31 | -0.58 | -0.26 | -0.20 | -0.19 | -0.15 | -0.286 |
| D1 | SNRP70        | 4191:135_CL1Contig1:f       | -0.25 | -0.38 | -0.14 | -0.39 | -0.43 | -0.41 | -0.38 | -0.01 | -0.300 |
| D1 | NPG4          | NM_213863.1                 | -0.35 | -0.31 | -0.36 | -0.21 | -0.11 | -0.61 | -0.26 | -0.55 | -0.344 |
| D1 | ?             | 6922:615_CL1Contig1:r       | -0.32 | -0.36 | -0.44 | -0.35 | -0.26 | -0.34 | -0.47 | -0.29 | -0.354 |
| D1 | SOX4          | 7382:45360_CL365Contig1:r   | -0.45 | -0.49 | -0.39 | -0.36 | -0.33 | -0.62 | -0.25 | 0.00  | -0.361 |
| D1 | RPL21         | 34363:777_40476095:f        | -0.48 | -0.13 | -0.46 | -0.59 | -0.27 | -0.34 | -0.43 | -0.38 | -0.385 |
| D1 | RPS3          | 2793:446_CL1Contig2:r       | -0.21 | -0.53 | -0.35 | -0.66 | -0.24 | -0.63 | -0.18 | -0.46 | -0.408 |
| D1 | CST7          | 2467:13124_CL2Contig1:r     | -0.56 | -0.58 | -0.63 | -0.55 | -0.44 | -0.80 | -0.31 | -0.17 | -0.505 |
| D1 | CCL5          | 5041:117_CL4Contig1:r       | -1.24 | -1.45 | -1.45 | -1.30 | -0.66 | -1.43 | -1.55 | -1.04 | -1.265 |
| D2 | IFIT3         | 19897:4950_CL3Contig1:f     | 3.40  | 0.79  | 2.20  | 4.53  | 4.94  | 1.39  | 3.70  | 0.83  | 2.723  |
| D2 | CXCL10        | 11504:20822_CL1Contig1:f    | 3.16  | 0.91  | 2.95  | 3.77  | 3.93  | 1.03  | 3.45  | 0.91  | 2.514  |
| D2 | IFIH1         | 6041:45360_CL586Contig1:r   | 2.93  | 0.27  | 3.33  | 3.27  | 4.14  | 1.03  | 2.53  | 0.93  | 2.304  |
| D2 | ISG20         | NM_001005351.2              | 2.55  | 0.69  | 1.83  | 2.98  | 2.96  | 2.06  | 3.78  | 0.75  | 2.200  |
| D2 | HERC5         | 10615:35840_CL7Contig1:r    | 2.76  | 0.40  | 2.71  | 4.36  | 3.36  | 0.45  | 2.85  | 0.70  | 2.198  |
| D2 | XAF1          | 5248:36876_CL1Contig2:r     | 2.93  | 0.77  | 2.36  | 3.87  | 3.08  | 1.12  | 2.57  | 0.76  | 2.183  |
| D2 | OAS1          | 35129:6613_CL1Contig2:r     | 2.34  | 1.05  | 2.38  | 2.51  | 3.01  | 1.40  | 3.60  | 0.54  | 2.104  |
| D2 | MX1           | 334:5560_CL1Contig1:r       | 2.37  | 0.63  | 2.51  | 2.73  | 3.10  | 1.09  | 2.84  | 0.72  | 2.000  |
| D2 | EPSTI1        | 1866:18535_CL1Contig1:f     | 1.33  | 0.74  | 1.83  | 2.84  | 2.62  | 0.79  | 4.09  | 0.87  | 1.889  |
| D2 | SAMD9         | 33393:5134_6863459:f        | 2.34  | 0.70  | 1.51  | 1.49  | 3.03  | 0.61  | 2.73  | 1.01  | 1.678  |
| D2 | FCGR1A        | 9778:5621_CL2Contig2:f      | 2.42  | 0.03  | 1.58  | 3.04  | 2.74  | 0.80  | 2.11  | 0.28  | 1.625  |
| D2 | IFI44         | 16784:18661_CL2Contig1:r    | 2.08  | 0.45  | 1.55  | 1.93  | 2.20  | 0.63  | 2.03  | 0.64  | 1.438  |
| D2 | CLEC12A       | 10820:13877_40430145:r      | 2.39  | 0.41  | 1.55  | 1.48  | 2.33  | 0.65  | 1.93  | 0.55  | 1.412  |
| D2 | NMI           | 5976:15972_CL1Contig1:r     | 1.97  | -0.11 | 1.45  | 2.98  | 2.36  | 0.68  | 1.18  | 0.50  | 1.376  |
| D2 | RHBDL1        | 19837:2976_CL1Contig1:r     | 1.52  | 0.41  | 1.45  | 1.71  | 2.43  | 1.03  | 1.87  | 0.42  | 1.355  |
| D2 | NRG1          | 34465:6810_CL1Contig1:f     | 1.89  | 0.21  | 1.79  | 2.10  | 2.17  | 0.63  | 1.25  | 0.25  | 1.286  |
| D2 | GYPA          | 18225:2035_CL1Contig1:f     | 1.30  | 1.09  | 0.89  | 0.90  | 1.34  | 0.41  | 3.31  | 1.05  | 1.285  |
| D2 | CCL8          | 16011:7770_CL2Contig1:r     | 1.68  | 0.25  | 1.51  | 2.02  | 2.05  | 0.53  | 1.76  | 0.42  | 1.278  |
| D2 | PARP9         | 531:2579_CL1Contig1:r       | 1.60  | 0.26  | 1.33  | 2.67  | 2.51  | 0.52  | 0.90  | 0.22  | 1.251  |
| D2 | BLVRB         | 4740:4270_CL1Contig1:f      | 1.41  | 0.93  | 0.87  | 1.40  | 1.95  | 0.97  | 1.68  | 0.47  | 1.210  |
| D2 | GBP2          | 18272:28721_CL3Contig1:f    | 1.16  | -0.01 | 1.85  | 2.14  | 1.68  | 0.40  | 1.65  | 0.54  | 1.176  |
| D2 | CASP4         | 2786:12475_CL2Contig1:r     | 1.64  | -0.04 | 1.36  | 2.06  | 2.93  | 0.40  | 1.00  | -0.02 | 1.166  |
| D2 | HEMGN         | 31211:29218_CL1Contig1:f    | 1.92  | 0.74  | 1.22  | 1.27  | 1.45  | 0.34  | 1.63  | 0.76  | 1.166  |
| D2 | NT5C3         | 10635:8497_CL2Contig1:f     | 1.60  | 0.43  | 1.82  | 1.34  | 1.06  | 0.18  | 1.78  | 0.53  | 1.093  |
| D2 | DHRS3         | 3623:13909_CL1Contig1:r     | 1.64  | 0.11  | 1.05  | 1.30  | 1.99  | 0.69  | 1.59  | 0.36  | 1.091  |
| D2 | LGALS3BP      | 4877:7567_CL1Contig1:r      | 1.49  | 0.32  | 1.32  | 1.52  | 1.75  | 0.54  | 1.00  | 0.21  | 1.019  |
| D2 | CA2           | 2584:32_CL4Contig1:f        | 1.07  | 0.72  | 1.23  | 1.64  | 1.07  | 0.50  | 1.50  | 0.32  | 1.007  |
| D2 | CCRL2         | 33938:16197_29279993:r      | 1.91  | 0.42  | 1.39  | 1.29  | 1.60  | 0.36  | 0.93  | 0.12  | 1.003  |
| D2 | ESCO1         | 31714:8268_CL3Contig1:f     | 0.67  | 0.57  | 0.02  | 1.97  | 1.86  | 0.73  | 1.38  | 0.76  | 0.994  |
| D2 | HERC6         | 10616:35840_CL8Contig1:r    | 1.48  | 0.31  | 1.22  | 1.02  | 1.11  | 0.44  | 1.46  | 0.74  | 0.972  |
| D2 | NEDD4L        | 15280:15066_CL3Contig1:r    | 1.19  | 0.44  | 0.91  | 2.17  | 1.04  | 0.35  | 1.21  | 0.40  | 0.964  |
| D2 | DNAJA1        | 11334:7676_CL1Contig3:r     | 1.17  | -0.11 | 1.49  | 1.41  | 2.32  | 0.49  | 0.82  | 0.07  | 0.958  |
| D2 | KLRP1         | 33260:45360_51353975:r      | 1.27  | -0.16 | 2.09  | 1.30  | 2.04  | 0.37  | 0.51  | 0.23  | 0.956  |
| D2 | SNCG          | 14617:16267_CL2Contig1:f    | 1.27  | 0.80  | 0.61  | 1.20  | 0.96  | 0.41  | 1.53  | 0.75  | 0.941  |
| D2 | PPBP          | 11474:10930_CL2Contig1:f    | 1.40  | 0.37  | 0.87  | 1.15  | 1.94  | 0.45  | 1.07  | 0.23  | 0.934  |
| D2 | 4933429H19Rik | 35159:25972_40835558:f      | 1.22  | 0.75  | 0.74  | 1.38  | 1.22  | 0.50  | 1.11  | 0.47  | 0.924  |
| D2 | HSH2D         | 11991:15444_CL1Contig1:r    | 1.19  | 0.22  | 1.23  | 1.67  | 1.10  | 0.25  | 1.44  | 0.28  | 0.923  |
| D2 | TRIM38        | 7353:45360_CL198Contig1:f   | 1.28  | 0.30  | 1.23  | 1.33  | 1.52  | 0.39  | 1.12  | 0.20  | 0.922  |
| D2 | ?             | 30450:45360_21548515:r      | 1.49  | 0.56  | 0.99  | 1.32  | 1.47  | 0.60  | 0.96  | -0.01 | 0.922  |
| D2 | STAT2         | 11310:15518_CL4Contig1:f    | 1.33  | 0.04  | 1.94  | 1.72  | 1.04  | 0.27  | 0.65  | 0.25  | 0.905  |
| D2 | UBD           | 17129:32384_C0007748o16-3:r | 1.83  | -0.07 | 1.38  | 1.37  | 0.92  | 0.25  | 1.28  | 0.24  | 0.900  |

|    |           |                            |      |       |       |       |      |       |      |       |       |
|----|-----------|----------------------------|------|-------|-------|-------|------|-------|------|-------|-------|
| D2 | TFDP2     | 32799:15670_CL3Contig1:f   | 1.54 | 0.49  | 1.06  | 0.96  | 0.76 | 0.25  | 1.29 | 0.64  | 0.874 |
| D2 | SLC25A39  | 19606:7458_CL1Contig1:r    | 0.74 | 0.83  | 0.86  | 1.29  | 0.85 | 0.22  | 1.75 | 0.35  | 0.862 |
| D2 | PPA1      | 8677:421_CL1Contig1:f      | 1.49 | 0.07  | 1.33  | 1.40  | 1.29 | 0.26  | 0.78 | 0.16  | 0.848 |
| D2 | ?         | 9758:24019_CL1Contig1:r    | 1.43 | 0.10  | 1.33  | 1.44  | 1.33 | 0.10  | 0.50 | 0.23  | 0.808 |
| D2 | FTL       | 31441:14826_CL1Contig2:r   | 0.96 | 0.39  | 0.87  | 1.19  | 1.22 | 0.40  | 0.87 | 0.49  | 0.799 |
| D2 | ?         | 9096:16108_CL1Contig2:r    | 1.14 | 0.25  | 1.19  | 1.51  | 1.02 | 0.49  | 0.60 | -0.04 | 0.770 |
| D2 | MBNL2     | 17987:44093_CL3Contig1:r   | 1.09 | 0.58  | 0.55  | 1.19  | 0.80 | 0.66  | 0.97 | 0.30  | 0.767 |
| D2 | CYB5      | 7597:7124_CL2Contig1:r     | 0.91 | 0.60  | 0.69  | 0.77  | 0.80 | 0.38  | 1.29 | 0.69  | 0.766 |
| D2 | S100A9    | 9818:11373_CL3Contig1:f    | 0.61 | -0.20 | 0.89  | 1.41  | 1.93 | 0.47  | 0.62 | 0.23  | 0.745 |
| D2 | ?         | 8909:1902_49325697:f       | 0.83 | 0.04  | 0.59  | 1.87  | 1.13 | 0.26  | 0.91 | 0.28  | 0.739 |
| D2 | CD2       | 15199:18506_CL1Contig1:r   | 0.90 | -0.02 | 1.23  | 1.95  | 0.61 | 0.00  | 0.90 | 0.32  | 0.737 |
| D2 | GVIN1     | 30427:8351_CL3Contig1:f    | 1.12 | 0.18  | 1.03  | 1.09  | 1.18 | 0.28  | 0.65 | 0.36  | 0.736 |
| D2 | HNRNPL    | 4056:186_CL1Contig1:r      | 0.77 | 0.63  | 0.66  | 1.27  | 0.84 | 0.60  | 0.96 | 0.13  | 0.733 |
| D2 | TCF21     | 13392:143_CL1Contig1:r     | 0.67 | 0.59  | 0.02  | 1.76  | 1.02 | 0.66  | 0.72 | 0.33  | 0.721 |
| D2 | LRFN5     | 32393:2399_CL1Contig1:r    | 0.80 | 0.48  | 0.61  | 1.62  | 0.89 | 0.57  | 0.43 | 0.34  | 0.718 |
| D2 | IL4R      | 7864:31132_CL1Contig1:f    | 0.95 | 0.15  | 1.18  | 1.17  | 0.85 | 0.15  | 0.96 | 0.28  | 0.712 |
| D2 | GABBR1    | 7329:32384_CL1Contig1:f    | 1.14 | 0.12  | 0.66  | 0.62  | 1.22 | 0.20  | 1.21 | 0.35  | 0.689 |
| D2 | HIST1H2BM | 7331:795_CL1Contig6:f      | 0.82 | 0.22  | 0.91  | 1.07  | 0.79 | 0.10  | 1.09 | 0.49  | 0.686 |
| D2 | GGH       | 13656:5720_CL1Contig1:f    | 1.43 | 0.13  | 0.88  | 1.04  | 0.76 | 0.18  | 0.82 | 0.14  | 0.673 |
| D2 | AMT       | 6946:10337_CL1Contig1:f    | 0.72 | 0.56  | 0.58  | 0.66  | 0.98 | 0.50  | 0.91 | 0.47  | 0.672 |
| D2 | ACCN3     | 10416:45360_CL254Contig1:r | 0.83 | 0.19  | 1.00  | 1.04  | 0.75 | 0.16  | 0.87 | 0.47  | 0.663 |
| D2 | NR6A1     | 19177:209_CL17Contig1:f    | 0.82 | 0.22  | 0.56  | 1.04  | 0.86 | 0.66  | 0.89 | 0.19  | 0.656 |
| D2 | C10orf58  | 2904:9809_CL1Contig2:f     | 0.64 | 0.62  | 0.86  | 0.71  | 0.84 | 0.06  | 1.22 | 0.29  | 0.655 |
| D2 | IFI6      | 6641:21023_CL1Contig1:r    | 0.96 | 0.32  | 0.71  | 0.87  | 0.54 | 0.41  | 1.00 | 0.38  | 0.649 |
| D2 | ?         | 14614:18972_CL1Contig1:r   | 0.79 | 0.32  | 1.09  | 0.97  | 0.54 | 0.27  | 0.71 | 0.49  | 0.647 |
| D2 | MAMDC2    | 15838:4330_CL1Contig1:f    | 0.67 | 0.46  | 0.58  | 0.76  | 0.93 | 0.44  | 0.80 | 0.40  | 0.630 |
| D2 | YPEL5     | 15225:672_CL2Contig1:f     | 0.45 | 0.35  | 0.69  | 0.60  | 0.81 | 0.27  | 1.26 | 0.50  | 0.617 |
| D2 | GBP1      | 13822:28721_CL1Contig2:r   | 0.75 | 0.38  | 0.02  | 1.15  | 0.92 | 0.41  | 0.96 | 0.35  | 0.617 |
| D2 | EIF5      | 17183:38594_CL1Contig1:r   | 0.48 | 0.04  | 0.61  | 1.36  | 1.15 | 0.13  | 0.75 | 0.35  | 0.608 |
| D2 | USP18     | 15714:14279_CL1Contig1:r   | 0.59 | 0.28  | 0.02  | 1.09  | 1.09 | 0.28  | 1.00 | 0.49  | 0.604 |
| D2 | DHX32     | 8401:29708_CL2Contig1:r    | 0.69 | 0.13  | 0.75  | 1.36  | 0.95 | 0.19  | 0.73 | 0.03  | 0.604 |
| D2 | TDRD7     | 12815:2278_CL1Contig1:f    | 0.69 | 0.12  | 0.59  | 1.37  | 0.96 | 0.25  | 0.59 | 0.13  | 0.586 |
| D2 | FUNDC1    | 15500:11574_CL2Contig1:r   | 1.07 | 0.28  | 0.39  | 0.37  | 0.83 | 0.56  | 0.93 | 0.20  | 0.579 |
| D2 | CWF19L2   | 18468:11748_CL2Contig1:f   | 0.67 | -0.09 | 0.95  | 0.57  | 1.14 | 0.00  | 0.78 | 0.57  | 0.574 |
| D2 | HSPB1     | 30978:621_CL1Contig1:f     | 0.95 | -0.04 | 0.79  | 1.13  | 0.88 | 0.47  | 0.50 | -0.14 | 0.568 |
| D2 | POMT1     | 34146:5974_40437789:f      | 0.56 | 0.19  | 0.81  | 0.96  | 0.80 | 0.20  | 0.66 | 0.33  | 0.564 |
| D2 | SEC62     | 33830:25972_51325396:r     | 0.87 | 0.34  | 0.55  | -0.23 | 0.99 | 0.35  | 1.26 | 0.38  | 0.563 |
| D2 | IGHA1     | 34043:15889_CL1Contig35:f  | 0.19 | 0.32  | 0.85  | 0.92  | 0.49 | 0.62  | 0.62 | 0.39  | 0.550 |
| D2 | POLR2K    | 2775:19486_CL1Contig1:r    | 1.03 | -0.06 | 0.69  | 0.83  | 1.02 | 0.24  | 0.51 | 0.13  | 0.549 |
| D2 | PSMA3     | 622:12850_CL2Contig2:f     | 0.76 | 0.11  | 1.11  | 0.77  | 0.60 | 0.04  | 0.82 | 0.14  | 0.544 |
| D2 | IGHA2     | 17230:15889_CL1Contig14:f  | 0.69 | 0.10  | 0.75  | 1.17  | 0.72 | 0.32  | 0.46 | 0.10  | 0.538 |
| D2 | TAP1      | 7079:45360_CL293Contig1:f  | 0.64 | -0.02 | 0.61  | 1.07  | 0.80 | 0.25  | 0.93 | 0.00  | 0.535 |
| D2 | UBB       | 19586:629_CL1Contig3:r     | 1.28 | 0.22  | 1.00  | 0.37  | 0.42 | -0.02 | 0.41 | 0.40  | 0.510 |
| D2 | PLAC8     | 17585:4705_54527068:f      | 0.48 | -0.07 | 1.05  | 0.94  | 0.79 | 0.35  | 0.43 | 0.07  | 0.505 |
| D2 | KDELR3    | 35320:12157_29280306:r     | 0.87 | 0.38  | 0.83  | 0.37  | 0.38 | -0.28 | 0.97 | 0.43  | 0.494 |
| D2 | BNIP3L    | 14520:10317_CL2Contig1:r   | 0.47 | 0.27  | 0.67  | 0.56  | 0.58 | 0.16  | 0.82 | 0.35  | 0.485 |
| D2 | NMT1      | 5502:5664_CL2Contig1:r     | 0.37 | 0.07  | 0.62  | 1.06  | 0.92 | 0.13  | 0.60 | 0.05  | 0.478 |
| D2 | PPP1R12A  | 20056:8141_CL1Contig1:r    | 0.68 | -0.07 | 0.87  | 0.57  | 0.85 | 0.18  | 0.66 | 0.06  | 0.475 |
| D2 | NKX2-2    | 30943:1320_CL1Contig1:f    | 0.55 | 0.33  | 0.67  | 0.42  | 0.61 | 0.47  | 0.37 | 0.17  | 0.449 |
| D2 | GLRX5     | 6658:18136_CL1Contig1:r    | 0.91 | 0.39  | -0.06 | 0.53  | 0.18 | 0.52  | 0.60 | 0.42  | 0.436 |

|    |           |                          |       |       |       |       |       |       |       |       |        |
|----|-----------|--------------------------|-------|-------|-------|-------|-------|-------|-------|-------|--------|
| D2 | MOV10     | 9861:11234_CL1Contig1:f  | 0.64  | 0.07  | 0.71  | 0.72  | 0.54  | 0.10  | 0.46  | 0.08  | 0.414  |
| D2 | Env       | 30397:2877_46176599:f    | 0.77  | 0.30  | 0.06  | 0.54  | 0.65  | 0.35  | 0.47  | 0.15  | 0.411  |
| D2 | PSMB2     | 9514:19152_CL2Contig1:r  | 0.69  | 0.11  | 0.21  | 0.87  | 0.56  | 0.17  | 0.50  | 0.07  | 0.397  |
| D2 | UROS      | 8402:28556_CL1Contig1:r  | 0.43  | 0.57  | -0.04 | 0.76  | 0.18  | 0.20  | 0.71  | 0.30  | 0.389  |
| D2 | ZNF236    | 7516:45360_40483100:f    | 0.55  | 0.53  | -0.13 | 0.30  | 0.30  | 0.56  | 0.40  | 0.36  | 0.359  |
| D2 | CHRNA9    | 32902:1920_29286541:r    | 0.33  | 0.41  | 0.02  | 0.42  | 0.16  | 0.49  | 0.63  | 0.33  | 0.348  |
| D2 | IFITM1    | 8910:1902_CL2Contig1:f   | 0.67  | 0.20  | 0.07  | 0.31  | 0.41  | 0.27  | 0.44  | 0.14  | 0.313  |
| D2 | FTH1      | 9106:45360_CL2Contig2:r  | 0.55  | 0.28  | 0.29  | 0.53  | 0.22  | 0.35  | 0.12  | 0.06  | 0.300  |
| D2 | FTH1      | 9106:45360_CL2Contig2:r  | 0.55  | 0.28  | 0.29  | 0.53  | 0.22  | 0.35  | 0.12  | 0.06  | 0.300  |
| D2 | CCL4      | 18693:117_CL2Contig1:f   | 0.37  | 0.05  | 0.51  | 0.20  | 0.57  | 0.28  | 0.28  | 0.11  | 0.296  |
| D2 | EIF4EBP3  | 32362:10584_CL3Contig1:f | 0.29  | 0.33  | -0.02 | 0.31  | 0.20  | 0.41  | 0.41  | 0.30  | 0.279  |
| D2 | RPUSD4    | 9026:23369_CL1Contig2:f  | 0.38  | 0.05  | 0.24  | 0.34  | 0.38  | 0.28  | 0.32  | 0.08  | 0.258  |
| D2 | CPB1      | 3867:7823_CL1Contig1:r   | 0.29  | 0.33  | 0.02  | 0.09  | 0.34  | 0.35  | 0.31  | 0.31  | 0.254  |
| D2 | TRIAP1    | 3855:4227_CL1Contig1:f   | 0.26  | 0.15  | 0.32  | 0.16  | 0.07  | 0.37  | 0.41  | 0.25  | 0.249  |
| D2 | ECM2      | 11914:19700_CL1Contig1:f | 0.30  | 0.15  | 0.09  | 0.26  | 0.28  | 0.42  | 0.13  | 0.35  | 0.248  |
| D2 | TMEM111   | 6807:7309_CL1Contig1:r   | 0.22  | 0.13  | 0.40  | 0.24  | 0.41  | 0.25  | 0.19  | 0.09  | 0.241  |
| D2 | LNPEP     | 30774:2610_54536029:f    | 0.18  | 0.14  | 0.34  | 0.24  | 0.24  | 0.23  | 0.22  | 0.20  | 0.224  |
| D2 | ADCY9     | 33293:3908_33289724:f    | 0.24  | 0.25  | 0.11  | 0.26  | 0.20  | 0.27  | 0.22  | 0.17  | 0.214  |
| D2 | CORO1A    | 7966:1963_CL1Contig1:r   | -0.56 | -0.04 | 0.08  | -0.19 | -0.03 | -0.18 | 0.18  | -0.23 | -0.121 |
| D2 | RNASEH2C  | 8844:6709_CL1Contig1:r   | -0.11 | -0.20 | -0.18 | -0.19 | -0.08 | -0.17 | -0.26 | -0.18 | -0.171 |
| D2 | VPS33B    | 34384:12527_51347795:f   | -0.08 | -0.19 | -0.20 | -0.11 | -0.16 | -0.22 | -0.35 | -0.16 | -0.184 |
| D2 | SLC35E4   | 19379:9615_CL1Contig1:f  | -0.16 | -0.10 | -0.20 | -0.07 | -0.20 | -0.26 | -0.32 | -0.19 | -0.187 |
| D2 | DMD       | 35079:12477_40392186:r   | -0.02 | -0.12 | -0.20 | -0.26 | -0.26 | -0.20 | -0.31 | -0.17 | -0.193 |
| D2 | ESR1      | 30565:7042_40409764:f    | -0.08 | -0.17 | -0.34 | -0.12 | -0.18 | -0.24 | -0.27 | -0.15 | -0.193 |
| D2 | FANCG     | 12740:4366_CL1Contig1:r  | -0.30 | -0.15 | -0.11 | -0.15 | -0.22 | -0.06 | -0.25 | -0.35 | -0.199 |
| D2 | TTC8      | 770:45360_6971895:f      | -0.08 | -0.15 | -0.41 | -0.16 | -0.15 | -0.32 | -0.24 | -0.14 | -0.206 |
| D2 | SNRPA     | 4121:6172_CL1Contig1:f   | -0.40 | -0.15 | -0.11 | -0.28 | -0.24 | -0.10 | -0.28 | -0.10 | -0.208 |
| D2 | CRYAA     | 16912:621_13658496:f     | -0.30 | -0.13 | -0.29 | -0.28 | -0.18 | -0.16 | -0.31 | -0.03 | -0.210 |
| D2 | MRPL12    | 4845:12239_CL1Contig1:r  | -0.06 | -0.14 | -0.19 | -0.12 | -0.33 | -0.32 | -0.25 | -0.29 | -0.213 |
| D2 | LIPC      | 1097:5938_CL1Contig1:r   | -0.22 | -0.15 | -0.14 | -0.37 | -0.23 | -0.28 | -0.13 | -0.19 | -0.214 |
| D2 | TXNDC13   | 30944:21813_54512553:f   | -0.05 | -0.14 | -0.14 | -0.15 | -0.33 | -0.40 | -0.26 | -0.24 | -0.214 |
| D2 | SH2D1A    | 18454:4886_CL1Contig1:f  | -0.18 | -0.31 | -0.09 | -0.18 | -0.15 | -0.20 | -0.19 | -0.42 | -0.215 |
| D2 | ?         | 30586:16246_CL3Contig1:r | -0.19 | -0.34 | 0.01  | -0.28 | -0.22 | -0.25 | -0.25 | -0.25 | -0.221 |
| D2 | EIF4B     | 11158:22321_CL1Contig1:r | -0.47 | -0.22 | -0.07 | -0.27 | -0.08 | -0.22 | -0.25 | -0.20 | -0.222 |
| D2 | LOC440716 | 14980:45360_13308382:f   | -0.18 | -0.27 | -0.21 | -0.20 | -0.18 | -0.39 | 0.01  | -0.36 | -0.223 |
| D2 | MC4R      | 7665:32245_6984155:f     | -0.22 | -0.19 | -0.44 | -0.16 | -0.35 | -0.08 | -0.26 | -0.11 | -0.226 |
| D2 | XPOT      | 33448:26763_CL1Contig1:r | -0.19 | -0.15 | -0.05 | -0.22 | -0.32 | -0.38 | -0.35 | -0.18 | -0.229 |
| D2 | ?         | TC202752:f               | -0.16 | -0.25 | -0.04 | -0.34 | -0.28 | -0.39 | -0.25 | -0.14 | -0.231 |
| D2 | PPP1R15A  | 4185:9275_CL1Contig1:f   | -0.06 | -0.31 | -0.15 | -0.14 | -0.23 | -0.23 | -0.44 | -0.29 | -0.231 |
| D2 | ST8SIAL1  | 10792:2452_CL1Contig1:r  | -0.30 | -0.19 | -0.26 | -0.31 | -0.22 | -0.22 | -0.01 | -0.35 | -0.233 |
| D2 | PRKRIR    | 14586:6872_37854756:f    | -0.24 | -0.29 | -0.11 | -0.30 | -0.05 | -0.37 | -0.09 | -0.41 | -0.233 |
| D2 | ?         | 1969:27491_CL1Contig1:r  | -0.10 | -0.39 | -0.21 | -0.15 | -0.19 | -0.27 | -0.31 | -0.27 | -0.236 |
| D2 | RPL7A     | 20270:44862_CL2Contig4:r | -0.71 | -0.15 | 0.09  | -0.31 | -0.26 | -0.20 | -0.13 | -0.22 | -0.236 |
| D2 | ?         | 33556:1448_37855342:r    | -0.08 | -0.22 | -0.28 | -0.23 | -0.41 | -0.06 | -0.25 | -0.36 | -0.236 |
| D2 | ?         | 35306:31762_34166446:r   | -0.42 | -0.19 | -0.08 | -0.27 | -0.04 | -0.26 | -0.29 | -0.34 | -0.236 |
| D2 | ?         | 30044:8771_40432705:r    | -0.29 | -0.24 | -0.06 | -0.31 | -0.31 | -0.23 | -0.16 | -0.31 | -0.239 |
| D2 | ?         | 4937:35251_CL1Contig3:f  | -0.32 | -0.39 | 0.01  | -0.39 | -0.16 | -0.30 | -0.19 | -0.18 | -0.239 |
| D2 | SPTLC2    | 30602:24900_CL3Contig1:r | -0.27 | -0.31 | -0.09 | -0.20 | -0.22 | -0.42 | -0.15 | -0.26 | -0.240 |
| D2 | PDE9A     | 320:9677_CL1Contig2:f    | -0.10 | -0.32 | -0.15 | -0.35 | -0.22 | -0.20 | -0.31 | -0.29 | -0.243 |
| D2 | NDUFA2    | 12477:7237_CL1Contig1:r  | -0.46 | -0.36 | -0.05 | -0.01 | -0.34 | -0.30 | -0.18 | -0.25 | -0.244 |

|    |          |                            |       |       |       |       |       |       |       |       |        |
|----|----------|----------------------------|-------|-------|-------|-------|-------|-------|-------|-------|--------|
| D2 | ARNT     | 9744:2753_13308811:f       | -0.24 | -0.23 | 0.03  | -0.45 | -0.20 | -0.34 | -0.34 | -0.19 | -0.245 |
| D2 | CALHM2   | 8286:9541_CL2Contig1:r     | -0.26 | -0.29 | -0.07 | -0.41 | -0.18 | -0.20 | -0.21 | -0.34 | -0.245 |
| D2 | RPL3     | 10996:7936_CL2Contig2:f    | -0.24 | -0.19 | -0.08 | -0.52 | -0.07 | -0.29 | 0.06  | -0.64 | -0.246 |
| D2 | CTSH     | 6481:2503_CL3Contig1:f     | -0.24 | -0.21 | -0.23 | -0.12 | -0.26 | -0.17 | -0.19 | -0.57 | -0.249 |
| D2 | MRPL37   | 9299:45360_CL54Contig1:r   | -0.16 | -0.32 | 0.09  | -0.42 | -0.21 | -0.31 | -0.37 | -0.30 | -0.249 |
| D2 | TEP1     | 932:20003_CL1Contig1:f     | -0.22 | -0.26 | -0.21 | -0.18 | -0.22 | -0.18 | -0.40 | -0.33 | -0.250 |
| D2 | HNRNPM   | 17488:8532_CL1Contig1:f    | -0.27 | -0.29 | 0.10  | -0.26 | -0.23 | -0.49 | -0.35 | -0.21 | -0.250 |
| D2 | THYN1    | 34054:12389_CL1Contig1:f   | -0.11 | -0.37 | -0.06 | -0.33 | -0.11 | -0.54 | -0.18 | -0.30 | -0.251 |
| D2 | LMBRD2   | 30224:6156_10868884:f      | -0.11 | -0.31 | -0.11 | -0.40 | -0.18 | -0.44 | -0.26 | -0.21 | -0.251 |
| D2 | ABCA13   | 33242:45360_54533878:f     | -0.47 | -0.27 | -0.11 | -0.46 | -0.12 | -0.07 | -0.32 | -0.20 | -0.253 |
| D2 | NDUFB5   | 15093:45360_CL80Contig1:r  | -0.32 | -0.28 | -0.02 | -0.41 | -0.20 | -0.26 | -0.29 | -0.25 | -0.254 |
| D2 | SF3B5    | 12877:3759_CL1Contig1:r    | -0.29 | -0.41 | -0.31 | -0.38 | -0.11 | -0.13 | 0.00  | -0.42 | -0.256 |
| D2 | C17orf80 | 18691:24967_CL1Contig2:f   | -0.22 | -0.31 | -0.32 | -0.12 | -0.28 | -0.28 | -0.26 | -0.26 | -0.257 |
| D2 | PSM12    | 34638:3990_CL3Contig1:f    | -0.35 | -0.22 | -0.06 | -0.49 | -0.28 | -0.19 | -0.26 | -0.21 | -0.257 |
| D2 | RBPJ     | 11695:3438_CL1Contig1:r    | -0.61 | -0.15 | -0.14 | -0.38 | -0.24 | -0.27 | -0.18 | -0.11 | -0.260 |
| D2 | PRDX5    | 9159:45700_CL1Contig1:f    | -0.14 | -0.33 | -0.17 | -0.19 | -0.26 | -0.28 | -0.31 | -0.43 | -0.264 |
| D2 | FAM36A   | 3459:139_CL1Contig4:f      | -0.37 | -0.28 | -0.13 | -0.30 | -0.23 | -0.30 | -0.24 | -0.27 | -0.265 |
| D2 | ?        | 6922:615_CL1Contig1:r      | -0.24 | -0.16 | -0.40 | -0.27 | -0.20 | -0.41 | -0.28 | -0.16 | -0.265 |
| D2 | IFT52    | 2234:20549_CL1Contig1:f    | 0.00  | -0.38 | -0.52 | -0.15 | -0.27 | -0.17 | -0.13 | -0.51 | -0.266 |
| D2 | CDK2AP1  | 3940:555_CL2Contig1:f      | -0.43 | -0.28 | 0.09  | -0.48 | -0.22 | -0.34 | -0.25 | -0.21 | -0.266 |
| D2 | TLR10    | NM_001030534.1             | -0.21 | -0.30 | -0.08 | -0.35 | -0.37 | -0.25 | -0.28 | -0.30 | -0.267 |
| D2 | ?        | TC205726:f                 | 0.02  | -0.42 | -0.24 | -0.19 | -0.09 | -0.32 | -0.35 | -0.55 | -0.268 |
| D2 | ASXL1    | 2126:25459_CL1Contig1:r    | -0.35 | -0.35 | 0.00  | -0.08 | -0.19 | -0.27 | -0.38 | -0.52 | -0.268 |
| D2 | HADHB    | 1256:45900_CL5Contig1:f    | -0.63 | -0.25 | -0.16 | -0.31 | -0.15 | -0.30 | -0.04 | -0.30 | -0.268 |
| D2 | ?        | 18755:9417_CL1Contig1:r    | -0.50 | -0.21 | -0.12 | -0.35 | -0.22 | -0.23 | -0.24 | -0.28 | -0.268 |
| D2 | VDAC1    | 11759:1014_CL2Contig1:r    | -0.56 | -0.15 | -0.11 | -0.38 | -0.24 | -0.30 | -0.33 | -0.08 | -0.269 |
| D2 | CCDC24   | 9423:16387_CL1Contig1:r    | -0.45 | -0.26 | -0.22 | -0.38 | -0.12 | -0.29 | -0.29 | -0.16 | -0.272 |
| D2 | DNAH17   | 18685:35384_9017986:r      | -0.37 | -0.28 | -0.08 | -0.37 | -0.24 | -0.30 | -0.31 | -0.22 | -0.272 |
| D2 | RPS2     | 19808:37160_CL1Contig2:f   | -0.50 | -0.12 | -0.28 | -0.52 | -0.39 | -0.18 | -0.01 | -0.18 | -0.272 |
| D2 | RABAC1   | 4096:17500_CL1Contig2:f    | -0.29 | -0.32 | -0.29 | -0.27 | -0.16 | -0.15 | -0.37 | -0.33 | -0.273 |
| D2 | ELMO3    | 4565:2475_CL1Contig1:f     | -0.19 | -0.20 | -0.16 | -0.22 | -0.39 | -0.21 | -0.60 | -0.21 | -0.273 |
| D2 | EZH2     | 10448:11104_CL1Contig1:f   | -0.55 | -0.27 | -0.04 | -0.35 | -0.18 | -0.26 | -0.26 | -0.28 | -0.273 |
| D2 | HLA-DRB2 | 7270:10014_CL1Contig7:r    | -0.22 | -0.22 | -0.22 | -0.31 | -0.13 | -0.36 | -0.35 | -0.37 | -0.273 |
| D2 | ESRRA    | 9157:209_CL8Contig1:f      | -0.40 | -0.02 | -0.24 | -0.56 | -0.50 | -0.25 | -0.07 | -0.16 | -0.275 |
| D2 | CCNL2    | 19353:15580_CL1Contig4:r   | -0.10 | -0.36 | 0.01  | -0.19 | -0.25 | -0.41 | -0.45 | -0.46 | -0.276 |
| D2 | CAP      | TC223746:f                 | -0.47 | -0.22 | -0.06 | -0.35 | -0.37 | -0.30 | -0.43 | -0.01 | -0.276 |
| D2 | LAMC1    | 15882:31332_CL2Contig1:f   | -0.42 | -0.32 | -0.20 | -0.30 | -0.42 | -0.23 | -0.09 | -0.23 | -0.276 |
| D2 | USP50    | 35166:22638_CL1Contig1:f   | -0.05 | -0.36 | -0.22 | -0.16 | -0.31 | -0.49 | -0.26 | -0.36 | -0.276 |
| D2 | AGBL3    | 31866:37696_CL2Contig1:r   | -0.53 | -0.22 | 0.06  | -0.37 | -0.22 | -0.45 | -0.37 | -0.11 | -0.276 |
| D2 | ZNF140   | 13467:45360_CL624Contig1:f | -0.16 | -0.34 | -0.15 | -0.05 | -0.24 | -0.39 | -0.49 | -0.40 | -0.277 |
| D2 | SSR2     | 9637:13197_CL1Contig2:r    | -0.50 | -0.33 | -0.16 | -0.09 | -0.24 | -0.36 | -0.24 | -0.30 | -0.278 |
| D2 | NSMCE1   | 7863:10816_CL1Contig1:f    | -0.40 | -0.30 | -0.16 | -0.26 | -0.09 | -0.36 | -0.38 | -0.29 | -0.280 |
| D2 | SLC25A17 | 11012:17461_CL1Contig1:r   | -0.43 | -0.21 | -0.12 | -0.37 | -0.45 | -0.29 | -0.16 | -0.21 | -0.280 |
| D2 | FAM23A   | 35337:35264_2578655:f      | -0.37 | -0.31 | 0.13  | -0.41 | -0.35 | -0.37 | -0.28 | -0.28 | -0.280 |
| D2 | ARHGDI1A | TC201186:f                 | -0.42 | -0.27 | -0.09 | -0.39 | -0.28 | -0.31 | -0.25 | -0.23 | -0.280 |
| D2 | RPLP0    | 3676:11285_CL1Contig1:r    | -0.05 | -0.09 | -0.25 | -0.57 | -0.34 | -0.25 | -0.29 | -0.41 | -0.281 |
| D2 | CA12     | 1083:32_9020115:f          | -0.58 | -0.23 | -0.19 | -0.07 | -0.43 | -0.29 | -0.21 | -0.25 | -0.282 |
| D2 | CPD      | 19568:5257_CL3Contig1:r    | -0.22 | -0.27 | -0.08 | -0.33 | -0.38 | -0.18 | -0.47 | -0.33 | -0.282 |
| D2 | TUBA1B   | 11181:14668_CL1Contig2:r   | -0.33 | -0.29 | 0.05  | -0.53 | -0.20 | -0.19 | -0.46 | -0.30 | -0.282 |
| D2 | CREB1    | 5695:1605_2071971:f        | -0.48 | -0.23 | -0.21 | -0.30 | -0.15 | -0.28 | -0.25 | -0.37 | -0.284 |

|    |            |                            |       |       |       |       |       |       |       |       |        |
|----|------------|----------------------------|-------|-------|-------|-------|-------|-------|-------|-------|--------|
| D2 | JTB        | 9551:8782_CL1Contig3:r     | -0.34 | -0.32 | -0.48 | -0.27 | -0.28 | -0.17 | -0.09 | -0.33 | -0.285 |
| D2 | ?          | 35212:25982_CL1Contig1:f   | -0.40 | -0.43 | -0.01 | -0.22 | -0.35 | -0.34 | -0.13 | -0.41 | -0.286 |
| D2 | NDFIP1     | 11811:28041_CL1Contig1:f   | -0.67 | -0.27 | -0.06 | -0.15 | -0.27 | -0.21 | -0.38 | -0.28 | -0.286 |
| D2 | ?          | TC227134:f                 | -0.19 | -0.24 | -0.25 | -0.43 | -0.26 | -0.32 | -0.29 | -0.32 | -0.288 |
| D2 | ?          | TC237309:f                 | -0.24 | -0.23 | -0.14 | -0.57 | -0.27 | -0.34 | -0.12 | -0.39 | -0.288 |
| D2 | EIF3G      | 31058:25157_CL1Contig1:r   | -0.24 | -0.29 | -0.38 | -0.27 | -0.23 | -0.36 | -0.12 | -0.43 | -0.290 |
| D2 | PAG6       | NM_001001536.2             | -0.32 | -0.29 | -0.18 | -0.21 | -0.32 | -0.26 | -0.37 | -0.38 | -0.291 |
| D2 | POLE4      | 1562:2667_CL1Contig2:f     | -0.34 | -0.33 | -0.19 | -0.23 | -0.34 | -0.23 | -0.32 | -0.35 | -0.291 |
| D2 | PORGSA1    | NM_214312.1                | -0.47 | -0.29 | -0.33 | -0.23 | -0.30 | -0.18 | -0.25 | -0.29 | -0.293 |
| D2 | TUBGCP2    | 19912:2441_CL1Contig1:r    | -0.32 | -0.21 | -0.28 | 0.01  | -0.31 | -0.39 | -0.44 | -0.41 | -0.294 |
| D2 | Pip5k1b    | TC211878:f                 | -0.21 | -0.30 | 0.11  | -0.38 | -0.34 | -0.61 | -0.49 | -0.14 | -0.296 |
| D2 | NEDD1      | 11383:29158_CL1Contig1:r   | -0.19 | -0.24 | -0.46 | -0.39 | 0.07  | -0.39 | -0.40 | -0.38 | -0.298 |
| D2 | ETS1       | 9043:32891_CL1Contig1:r    | -0.50 | -0.28 | -0.33 | -0.41 | -0.27 | -0.22 | 0.15  | -0.53 | -0.299 |
| D2 | SCAND1     | 2170:45360_CL156Contig1:f  | -0.34 | -0.38 | 0.00  | -0.14 | -0.46 | -0.47 | -0.38 | -0.23 | -0.300 |
| D2 | PTPN18     | 5951:4199_CL9Contig1:f     | -0.24 | -0.27 | -0.33 | -0.16 | 0.01  | -0.40 | -0.60 | -0.41 | -0.300 |
| D2 | ?          | TC236491:f                 | -0.08 | -0.14 | -0.14 | -0.14 | -0.53 | -0.47 | -0.59 | -0.32 | -0.301 |
| D2 | RAB28      | TC225981:f                 | -0.27 | -0.41 | -0.06 | -0.30 | -0.42 | -0.36 | -0.38 | -0.21 | -0.301 |
| D2 | ?          | 35360:34607_21546426:f     | -0.50 | -0.30 | -0.39 | -0.18 | -0.09 | -0.35 | -0.28 | -0.33 | -0.303 |
| D2 | THEM2      | 7364:17573_CL1Contig1:r    | -0.40 | -0.33 | -0.02 | -0.68 | -0.31 | -0.35 | -0.12 | -0.22 | -0.304 |
| D2 | SNRPF      | 11377:5753_CL1Contig2:f    | -0.51 | -0.43 | -0.01 | -0.38 | 0.03  | -0.47 | -0.25 | -0.41 | -0.304 |
| D2 | SNRP70     | 4191:135_CL1Contig1:f      | -0.45 | -0.39 | -0.25 | -0.40 | 0.12  | -0.13 | -0.48 | -0.45 | -0.304 |
| D2 | MLL5       | 10565:43228_CL2Contig2:r   | -0.44 | -0.33 | 0.15  | -0.62 | -0.39 | -0.35 | -0.25 | -0.21 | -0.305 |
| D2 | CD5        | 9062:18808_CL1Contig1:r    | -0.56 | -0.40 | -0.39 | 0.08  | -0.07 | -0.38 | -0.31 | -0.41 | -0.305 |
| D2 | PIK3R4     | 34603:6366_CL1Contig1:r    | -0.34 | -0.47 | 0.14  | -0.41 | -0.23 | -0.41 | -0.43 | -0.30 | -0.306 |
| D2 | ?          | 34831:45360_CL752Contig1:r | -0.15 | -0.28 | -0.06 | -0.16 | -0.29 | -0.71 | -0.30 | -0.50 | -0.306 |
| D2 | SUPT4H1    | 30699:6755_CL2Contig1:f    | -0.66 | -0.30 | 0.03  | -0.54 | -0.35 | -0.24 | -0.16 | -0.23 | -0.307 |
| D2 | EEF1G      | 9118:5715_CL1Contig1:r     | -0.39 | -0.29 | -0.22 | -0.23 | -0.41 | -0.28 | -0.37 | -0.28 | -0.309 |
| D2 | RNF111     | TC229579:f                 | -0.61 | -0.37 | -0.05 | -0.28 | 0.01  | -0.28 | -0.50 | -0.40 | -0.310 |
| D2 | ?          | 15534:13557_CL1Contig1:r   | -0.40 | -0.33 | -0.21 | -0.56 | -0.29 | -0.31 | 0.10  | -0.50 | -0.312 |
| D2 | ?          | TC234835:f                 | -0.22 | -0.33 | -0.08 | -0.43 | -0.23 | -0.35 | -0.54 | -0.32 | -0.313 |
| D2 | ?          | 4237:1570_CL2Contig1:r     | -0.13 | -0.34 | -0.21 | -0.09 | -0.47 | -0.44 | -0.38 | -0.45 | -0.313 |
| D2 | Pion       | 33704:28141_CL1Contig1:f   | -0.69 | -0.23 | -0.16 | -0.35 | -0.37 | -0.18 | -0.34 | -0.19 | -0.313 |
| D2 | GPR37      | 17703:5303_CL2Contig1:f    | -0.56 | -0.07 | -0.32 | -0.39 | -0.43 | -0.25 | -0.31 | -0.18 | -0.314 |
| D2 | HN1        | 4952:11141_CL1Contig1:f    | -0.19 | -0.23 | -0.46 | -0.45 | -0.53 | -0.19 | -0.15 | -0.31 | -0.314 |
| D2 | LOC127148  | TC226955:f                 | -0.45 | -0.55 | 0.05  | -0.35 | -0.46 | -0.35 | -0.07 | -0.34 | -0.315 |
| D2 | TYROBP     | NM_214202.1                | -0.34 | -0.36 | -0.14 | -0.05 | -0.19 | -0.16 | -0.73 | -0.54 | -0.315 |
| D2 | GPX4       | 12404:21000_CL1Contig1:f   | -0.22 | -0.49 | -0.25 | -0.39 | -0.19 | -0.24 | -0.37 | -0.40 | -0.319 |
| D2 | ?          | TC204793:f                 | -0.27 | -0.47 | -0.08 | -0.26 | -0.09 | -0.79 | -0.41 | -0.18 | -0.319 |
| D2 | BANK1      | 14866:18098_CL1Contig1:f   | -0.08 | -0.45 | -0.03 | -0.07 | -0.30 | -0.53 | -0.53 | -0.56 | -0.319 |
| D2 | RASA2      | 261:20073_CL1Contig1:f     | -0.58 | -0.36 | -0.07 | -0.62 | -0.34 | -0.41 | 0.09  | -0.26 | -0.319 |
| D2 | ?          | TC221562:f                 | -0.16 | -0.31 | -0.42 | -0.23 | -0.33 | -0.37 | -0.26 | -0.50 | -0.323 |
| D2 | ST6GALNAC6 | 17747:13413_CL5Contig1:f   | -0.69 | -0.41 | 0.05  | -0.41 | -0.09 | -0.34 | -0.50 | -0.20 | -0.323 |
| D2 | ?          | TC207274:f                 | -0.50 | -0.47 | 0.03  | -0.05 | -0.22 | -0.38 | -0.63 | -0.37 | -0.323 |
| D2 | C10        | 10852:3860_CL1Contig1:r    | -0.43 | -0.35 | -0.34 | -0.52 | -0.16 | -0.20 | -0.28 | -0.31 | -0.324 |
| D2 | DOK2       | 12799:24976_CL1Contig2:r   | -0.55 | -0.31 | -0.09 | -0.39 | -0.12 | -0.35 | -0.54 | -0.24 | -0.324 |
| D2 | LY86       | 15147:29060_CL1Contig1:f   | -0.35 | -0.28 | -0.06 | -0.38 | -0.54 | -0.33 | -0.22 | -0.44 | -0.325 |
| D2 | ?          | TC210410:f                 | -0.08 | -0.40 | -0.12 | -0.09 | -0.31 | -0.54 | -0.62 | -0.45 | -0.326 |
| D2 | TMTC1      | 10764:8413_37799115:r      | -0.50 | -0.15 | -0.07 | -0.53 | -0.64 | -0.31 | 0.07  | -0.49 | -0.328 |
| D2 | WAS        | 9986:35707_CL4Contig1:f    | -0.61 | -0.39 | 0.01  | -0.34 | -0.23 | -0.25 | -0.54 | -0.28 | -0.328 |
| D2 | C12orf51   | 3649:31482_CL1Contig1:f    | -0.24 | -0.23 | -0.35 | -0.24 | -0.30 | -0.42 | -0.44 | -0.42 | -0.330 |

|    |          |                            |       |       |       |       |       |       |       |       |        |
|----|----------|----------------------------|-------|-------|-------|-------|-------|-------|-------|-------|--------|
| D2 | ?        | 17700:44684_CL1Contig1:f   | -0.36 | -0.38 | -0.14 | -0.18 | -0.27 | -0.67 | -0.32 | -0.32 | -0.331 |
| D2 | RPL4     | 3869:4038_CL1Contig1:f     | -0.37 | -0.19 | -0.38 | -0.41 | -0.60 | -0.28 | -0.01 | -0.41 | -0.331 |
| D2 | SKAP1    | 4794:7239_26017787:f       | -0.22 | -0.42 | -0.09 | -0.34 | -0.30 | -0.31 | -0.60 | -0.38 | -0.332 |
| D2 | CLK1     | 33413:29470_CL1Contig5:f   | -0.30 | -0.41 | 0.00  | -0.47 | -0.24 | -0.37 | -0.46 | -0.42 | -0.334 |
| D2 | ?        | 32247:31056_11997424:f     | -0.53 | -0.30 | 0.09  | -0.56 | -0.34 | -0.39 | -0.41 | -0.24 | -0.334 |
| D2 | ACP1     | 16572:9139_CL1Contig1:r    | -0.61 | -0.29 | 0.01  | -0.45 | -0.42 | -0.31 | -0.35 | -0.26 | -0.335 |
| D2 | SNX3     | 1514:28861_CL1Contig1:f    | -0.61 | -0.27 | -0.53 | -0.69 | -0.08 | -0.20 | -0.01 | -0.29 | -0.335 |
| D2 | ?        | TC208663:f                 | -0.55 | -0.34 | -0.13 | -0.15 | -0.26 | -0.32 | -0.56 | -0.38 | -0.336 |
| D2 | HIGD2A   | 12390:15762_CL1Contig1:f   | -0.40 | -0.34 | -0.53 | -0.24 | -0.26 | -0.43 | -0.13 | -0.37 | -0.338 |
| D2 | ?        | 34842:45360_40467715:r     | 0.03  | -0.38 | -0.09 | -0.26 | -0.18 | -0.59 | -0.59 | -0.65 | -0.339 |
| D2 | ?        | TC224822:f                 | -0.61 | -0.48 | 0.06  | -0.53 | -0.18 | -0.33 | -0.47 | -0.17 | -0.340 |
| D2 | ?        | 16719:6284_CL2Contig1-A:f  | -0.19 | -0.63 | 0.01  | -0.39 | -0.07 | -0.71 | -0.41 | -0.33 | -0.340 |
| D2 | ?        | 30182:16496_51348479:r     | -0.35 | -0.35 | 0.21  | -0.49 | -0.26 | -0.50 | -0.53 | -0.45 | -0.340 |
| D2 | FLJ42200 | 34860:45360_40472883:f     | -0.22 | -0.31 | 0.01  | -0.61 | -0.30 | -0.17 | -0.57 | -0.56 | -0.341 |
| D2 | ZNF574   | 4100:20977_CL1Contig2:r    | -0.50 | -0.25 | -0.02 | -0.42 | -0.58 | -0.12 | -0.53 | -0.32 | -0.343 |
| D2 | HNRNPH3  | 8659:32575_CL7Contig2:f    | -0.85 | -0.47 | -0.05 | -0.33 | -0.16 | -0.45 | 0.03  | -0.47 | -0.344 |
| D2 | CST7     | 2467:13124_CL2Contig1:r    | -0.47 | -0.23 | -0.13 | -0.37 | -0.56 | -0.25 | -0.37 | -0.37 | -0.344 |
| D2 | ?        | 20188:2738_CL1Contig2:r    | -0.27 | -0.37 | 0.02  | -0.45 | -0.38 | -0.40 | -0.51 | -0.40 | -0.345 |
| D2 | CDKN1B   | 10809:15844_CL1Contig1:r   | -0.85 | -0.33 | 0.04  | -0.37 | -0.42 | -0.20 | -0.53 | -0.11 | -0.346 |
| D2 | LPCAT3   | 20058:5817_CL1Contig1:r    | -0.26 | -0.26 | -0.20 | -0.40 | -0.24 | -0.54 | -0.47 | -0.41 | -0.347 |
| D2 | RBM3     | 9984:2811_CL2Contig1:r     | -0.53 | -0.14 | -0.53 | -0.46 | -0.47 | -0.26 | -0.01 | -0.38 | -0.347 |
| D2 | PDE7A    | TC225666:f                 | -0.85 | -0.37 | -0.07 | -0.43 | -0.31 | -0.23 | -0.22 | -0.31 | -0.348 |
| D2 | DBI      | 5584:8108_CL1Contig1:r     | -0.14 | -0.46 | -0.33 | -0.41 | -0.20 | -0.54 | -0.41 | -0.30 | -0.349 |
| D2 | RPS21    | 2056:38207_CL1Contig2:r    | -0.37 | -0.33 | -0.35 | -0.45 | -0.07 | -0.49 | -0.51 | -0.23 | -0.350 |
| D2 | ?        | 34920:45360_18985695:f     | -0.22 | -0.21 | -0.19 | -0.60 | -0.45 | -0.61 | -0.09 | -0.43 | -0.350 |
| D2 | ?        | TC206742:f                 | -0.37 | -0.30 | -0.17 | -0.46 | -0.45 | -0.35 | -0.51 | -0.20 | -0.351 |
| D2 | KHSRP    | 20172:22573_41131932:f     | -0.59 | -0.26 | 0.13  | -0.53 | -0.57 | -0.26 | -0.66 | -0.08 | -0.352 |
| D2 | ?        | TC223606:f                 | -0.37 | -0.27 | -0.12 | -0.27 | -0.46 | -0.34 | -0.79 | -0.20 | -0.352 |
| D2 | SPATA4   | TC203310:f                 | -0.35 | -0.45 | 0.12  | -0.88 | -0.23 | -0.51 | -0.26 | -0.26 | -0.353 |
| D2 | YTHDC1   | 16152:4191_CL2Contig1:r    | -0.29 | -0.37 | 0.19  | -0.90 | -0.39 | -0.35 | -0.44 | -0.27 | -0.353 |
| D2 | ?        | TC223986:f                 | -0.74 | -0.56 | -0.04 | -0.34 | -0.28 | -0.33 | -0.37 | -0.20 | -0.356 |
| D2 | ?        | 34946:45360_CL1Contig13:f  | -0.34 | -0.34 | 0.06  | -0.62 | -0.69 | -0.33 | -0.54 | -0.06 | -0.358 |
| D2 | ?        | 7434:435_CL1Contig1-B:r    | -0.59 | -0.39 | -0.11 | -0.28 | -0.54 | -0.31 | -0.24 | -0.41 | -0.359 |
| D2 | ?        | TC237843:f                 | -0.50 | -0.53 | 0.16  | -0.34 | -0.09 | -0.40 | -0.81 | -0.36 | -0.359 |
| D2 | Zbtb4    | 16114:39798_CL1Contig1:f   | -0.38 | -0.45 | -0.72 | 0.03  | 0.07  | -0.54 | -0.25 | -0.64 | -0.360 |
| D2 | ?        | 34339:9365_12010298:r      | -0.24 | -0.29 | -0.09 | -0.47 | -0.49 | -0.46 | -0.51 | -0.34 | -0.360 |
| D2 | ?        | 15139:15636_CL1Contig2-B:f | -0.37 | -0.44 | -0.07 | -0.16 | -0.42 | -0.67 | -0.40 | -0.36 | -0.361 |
| D2 | ZC3H7A   | 7769:7759_CL1Contig1:f     | -0.56 | -0.46 | -0.03 | -0.42 | -0.09 | -0.39 | -0.52 | -0.41 | -0.361 |
| D2 | PNPLA3   | 11052:10135_CL2Contig1:r   | -0.40 | -0.17 | -0.34 | -0.15 | -0.41 | -0.47 | -0.71 | -0.24 | -0.361 |
| D2 | MPP1     | 10175:1482_CL2Contig1:f    | -0.88 | -0.42 | -0.19 | -0.07 | -0.24 | -0.17 | -0.50 | -0.43 | -0.363 |
| D2 | ZNF251   | 19272:45360_CL174Contig1:f | -0.32 | -0.36 | -0.58 | -0.11 | -0.27 | -0.32 | -0.37 | -0.57 | -0.363 |
| D2 | ?        | 34340:45360_CL761Contig1:r | -0.38 | -0.30 | -0.14 | -0.64 | -0.35 | -0.48 | -0.16 | -0.45 | -0.363 |
| D2 | SLC25A6  | 10120:44685_CL1Contig1:r   | -0.58 | -0.11 | -0.46 | -0.43 | -0.38 | -0.32 | -0.35 | -0.28 | -0.363 |
| D2 | CTCF     | TC207555:f                 | -0.42 | -0.56 | 0.12  | -0.18 | -0.45 | -0.49 | -0.62 | -0.31 | -0.364 |
| D2 | ZMYM2    | 1981:46305_CL6Contig1:r    | -0.51 | -0.49 | -0.14 | -0.31 | -0.18 | -0.43 | -0.40 | -0.49 | -0.369 |
| D2 | ?        | 16003:6090_CL4Contig1:r    | -0.74 | -0.52 | 0.14  | -0.33 | -0.15 | -0.33 | -0.57 | -0.47 | -0.371 |
| D2 | POLG2    | 19524:4958_CL2Contig1:f    | -0.50 | -0.47 | -0.04 | -0.34 | -0.22 | -0.42 | -0.49 | -0.49 | -0.371 |
| D2 | ?        | TC223365:f                 | -0.72 | -0.35 | 0.01  | -0.39 | -0.24 | -0.31 | -0.57 | -0.42 | -0.374 |
| D2 | GCSH     | 19460:24177_CL1Contig1:f   | -0.32 | -0.67 | 0.16  | -0.41 | -0.27 | -0.34 | -0.59 | -0.55 | -0.374 |
| D2 | ?        | 6558:5359_CL1Contig1:f     | -0.64 | -0.33 | 0.05  | -0.66 | -0.19 | -0.42 | -0.69 | -0.11 | -0.374 |

|    |            |                              |       |       |       |       |       |       |       |       |        |
|----|------------|------------------------------|-------|-------|-------|-------|-------|-------|-------|-------|--------|
| D2 | CRTC3      | 6419:6741_CL1Contig1:f       | -0.59 | -0.45 | 0.13  | -0.43 | -0.46 | -0.29 | -0.69 | -0.23 | -0.376 |
| D2 | ZADH2      | 33302:41148_CL1Contig1:r     | -0.63 | -0.54 | 0.09  | -0.33 | -0.14 | -0.42 | -0.54 | -0.51 | -0.378 |
| D2 | ?          | TC237585:r                   | -0.32 | -0.55 | -0.07 | -0.53 | 0.05  | -0.36 | -0.81 | -0.43 | -0.378 |
| D2 | ?          | TC205928:r                   | -0.34 | -0.23 | -0.15 | -0.11 | -0.66 | -0.62 | -0.62 | -0.30 | -0.378 |
| D2 | ATOH8      | TC199539:f                   | -0.47 | -0.36 | 0.31  | -0.71 | -0.58 | -0.42 | -0.26 | -0.54 | -0.378 |
| D2 | SIRT1      | TC208005:f                   | -0.35 | -0.58 | -0.09 | -0.22 | -0.34 | -0.39 | -0.71 | -0.36 | -0.380 |
| D2 | ?          | 13624:45360_CL260Contig1-B:r | -0.43 | -0.49 | 0.20  | -0.12 | -0.43 | -0.52 | -0.51 | -0.74 | -0.380 |
| D2 | BHLHB2     | 6835:4615_12008291:r         | -0.51 | -0.36 | -0.08 | -0.32 | -0.43 | -0.42 | -0.65 | -0.28 | -0.381 |
| D2 | MGC35023   | 32989:45360_CL661Contig1:f   | -0.37 | -0.31 | -0.19 | -0.77 | -0.34 | -0.35 | -0.26 | -0.46 | -0.381 |
| D2 | ?          | 812:14912_CL2Contig1-A:f     | -0.69 | -0.44 | -0.15 | -0.24 | -0.25 | -0.37 | -0.36 | -0.56 | -0.382 |
| D2 | RPS3       | 2793:446_CL1Contig2:r        | 0.18  | -0.38 | -0.44 | -0.58 | -0.16 | -0.57 | -0.34 | -0.77 | -0.383 |
| D2 | POLR2L     | 14433:11495_CL1Contig1:r     | -0.27 | -0.35 | -0.65 | -0.69 | -0.18 | -0.23 | -0.24 | -0.45 | -0.383 |
| D2 | SLC5A11    | 7875:695_CL2Contig1:r        | -0.50 | -0.34 | -0.11 | -0.50 | -0.49 | -0.41 | -0.34 | -0.38 | -0.384 |
| D2 | ?          | 1056:8920_CL1Contig1:r       | -0.41 | -0.50 | 0.18  | -0.84 | -0.20 | -0.61 | -0.43 | -0.26 | -0.384 |
| D2 | ?          | 18433:18889_CL1Contig1:r     | -0.71 | -0.44 | 0.00  | -0.39 | -0.15 | -0.37 | -0.57 | -0.47 | -0.387 |
| D2 | MAP3K5     | TC214564:f                   | -0.59 | -0.42 | 0.00  | -0.66 | 0.05  | -0.26 | -0.85 | -0.37 | -0.388 |
| D2 | ?          | 34656:45360_40829491:r       | -0.27 | -0.34 | -0.04 | -0.81 | -0.20 | -0.66 | -0.06 | -0.72 | -0.388 |
| D2 | ?          | 17242:2280_CL1Contig1:r      | -0.56 | -0.20 | -0.39 | -0.69 | -0.39 | -0.41 | -0.24 | -0.25 | -0.391 |
| D2 | HLA-DMB    | 7088:15487_CL1Contig3:f      | -0.34 | -0.22 | -0.47 | -0.49 | -0.68 | -0.26 | -0.41 | -0.26 | -0.391 |
| D2 | ?          | TC206544:f                   | -0.56 | -0.44 | 0.20  | -0.45 | -0.81 | -0.36 | -0.47 | -0.25 | -0.392 |
| D2 | RHOQ       | 18543:2876_CL6Contig1:f      | -0.34 | -0.59 | 0.11  | -0.26 | -0.53 | -0.45 | -0.48 | -0.63 | -0.396 |
| D2 | ECHS1      | 19915:32175_CL1Contig2:r     | -0.27 | -0.35 | -0.65 | -0.41 | -0.42 | -0.33 | -0.25 | -0.49 | -0.396 |
| D2 | KARS       | 4667:26410_CL1Contig1:f      | -0.48 | -0.34 | -0.35 | -0.33 | -0.26 | -0.32 | -0.37 | -0.74 | -0.398 |
| D2 | ING2       | 19087:2515_CL2Contig1:f      | -0.93 | -0.46 | 0.14  | -0.30 | -0.23 | -0.46 | -0.49 | -0.46 | -0.398 |
| D2 | ARRB2      | 13281:1924_CL1Contig1:f      | -0.37 | -0.08 | -0.71 | -0.50 | -0.62 | -0.27 | -0.44 | -0.21 | -0.400 |
| D2 | PCNP       | 1665:28073_CL1Contig1:f      | -0.67 | -0.32 | 0.12  | -0.81 | -0.30 | -0.38 | -0.73 | -0.11 | -0.400 |
| D2 | JRKL       | 35254:45360_C0007758e03-7:f  | -0.11 | -0.34 | -0.24 | -0.84 | -0.41 | -0.36 | -0.59 | -0.33 | -0.403 |
| D2 | TINP1      | 6143:9780_CL1Contig1:r       | -0.53 | -0.46 | 0.02  | -0.14 | -0.23 | -0.53 | -1.01 | -0.35 | -0.404 |
| D2 | HLA-DRA    | 34410:2024_CL2Contig1:f      | -0.46 | -0.33 | -0.56 | -0.15 | -0.66 | -0.25 | -0.38 | -0.44 | -0.405 |
| D2 | GTF2H5     | 15722:3611_CL1Contig1:r      | -0.50 | -0.43 | -0.02 | -0.75 | -0.42 | -0.42 | -0.41 | -0.29 | -0.405 |
| D2 | RGD1560191 | 16838:45360_CL531Contig1:f   | -0.43 | -0.50 | 0.18  | -0.66 | -0.50 | -0.28 | -0.65 | -0.40 | -0.405 |
| D2 | MRPL10     | 2307:12629_40481805:f        | -0.51 | -0.34 | -0.15 | -0.35 | -0.24 | -0.50 | -0.57 | -0.59 | -0.406 |
| D2 | ?          | TC209541:f                   | -0.61 | -0.39 | -0.12 | -0.54 | -0.26 | -0.41 | -0.62 | -0.31 | -0.408 |
| D2 | FMNL3      | TC204461:f                   | -0.51 | -0.42 | -0.20 | -0.20 | -0.53 | -0.30 | -0.53 | -0.58 | -0.409 |
| D2 | ?          | 34426:45360_59822504:f       | -0.72 | -0.33 | 0.20  | -0.57 | -0.41 | -0.64 | -0.22 | -0.59 | -0.410 |
| D2 | CDC42      | 5934:2876_CL5Contig2:f       | -0.90 | -0.57 | 0.02  | -0.61 | 0.00  | -0.66 | -0.22 | -0.34 | -0.410 |
| D2 | EIF2       | TC228336:f                   | -0.74 | -0.45 | 0.01  | -0.64 | -0.39 | -0.44 | -0.35 | -0.31 | -0.414 |
| D2 | ?          | 1821:21986_40828998:r        | -0.95 | -0.33 | -0.01 | -0.71 | -0.54 | -0.66 | -0.01 | -0.14 | -0.419 |
| D2 | ?          | TC236435:r                   | -0.58 | -0.32 | -0.09 | -0.75 | -0.45 | -0.43 | -0.49 | -0.27 | -0.422 |
| D2 | AR         | 15027:2453_CL2Contig1:f      | -0.48 | -0.33 | -0.26 | -0.52 | -0.53 | -0.54 | -0.43 | -0.28 | -0.422 |
| D2 | ?          | TC235030:f                   | -0.50 | -0.52 | -0.14 | -0.56 | -0.30 | -0.41 | -0.44 | -0.54 | -0.426 |
| D2 | PABPN1     | 880:20140_59815167:f         | -0.34 | -0.41 | -0.18 | -0.56 | -0.42 | -0.49 | -0.47 | -0.56 | -0.429 |
| D2 | ?          | TC207913:f                   | -0.85 | -0.61 | 0.38  | -0.31 | -0.28 | -0.62 | -0.79 | -0.38 | -0.433 |
| D2 | ?          | TC222586:f                   | -0.83 | -0.52 | -0.10 | -0.48 | -0.39 | -0.46 | -0.32 | -0.37 | -0.433 |
| D2 | LCK        | 5793:34974_CL2Contig1:r      | -0.79 | -0.35 | -0.47 | -0.23 | -0.33 | -0.67 | -0.31 | -0.38 | -0.441 |
| D2 | ?          | 30496:28608_CL2Contig1:f     | -0.55 | -0.45 | -0.39 | -0.45 | -0.27 | -0.30 | -0.76 | -0.39 | -0.445 |
| D2 | CFD        | 33620:45360_CL17Contig1:r    | -0.48 | -0.26 | -0.60 | -0.39 | -0.33 | -0.49 | -0.66 | -0.35 | -0.445 |
| D2 | Fau        | 33782:8061_59822061:r        | -0.35 | -0.34 | -0.41 | -0.66 | -0.27 | -0.23 | -0.68 | -0.62 | -0.445 |
| D2 | RAB3IP     | 30971:28156_CL1Contig1:r     | -0.69 | -0.31 | -0.30 | -0.41 | -0.27 | -0.35 | -0.43 | -0.83 | -0.448 |
| D2 | GNAS       | 14089:41223_CL1Contig5:f     | -0.51 | -0.38 | -0.44 | -0.47 | -0.61 | -0.42 | -0.13 | -0.63 | -0.449 |

|    |           |                             |       |       |       |       |       |       |       |       |        |
|----|-----------|-----------------------------|-------|-------|-------|-------|-------|-------|-------|-------|--------|
| D2 | HLA-DQA1  | 33905:2024_CL1Contig2:f     | -0.40 | -0.37 | -0.28 | -0.58 | -0.52 | -0.30 | -0.54 | -0.61 | -0.450 |
| D2 | CD9       | 10868:1447_49347123:f       | -1.07 | -0.10 | -0.45 | -0.18 | -0.45 | -0.41 | -0.24 | -0.71 | -0.450 |
| D2 | MRPL52    | 18510:26326_CL1Contig1:f    | -0.27 | -0.58 | -0.39 | -0.48 | -0.42 | -0.44 | -0.46 | -0.57 | -0.451 |
| D2 | HCST      | 30959:21243_CL1Contig1:f    | -0.35 | -0.41 | -0.81 | -0.22 | -0.27 | -0.35 | -0.65 | -0.55 | -0.452 |
| D2 | ?         | TC223079:f                  | -0.50 | -0.53 | 0.26  | -0.57 | -0.23 | -0.46 | -0.97 | -0.62 | -0.453 |
| D2 | C18orf8   | 31716:1836_CL1Contig1:f     | -0.50 | -0.54 | -0.07 | -0.41 | -0.41 | -0.28 | -0.68 | -0.74 | -0.454 |
| D2 | ?         | 12760:8055_CL1Contig1-B:f   | -0.38 | -0.41 | 0.09  | -0.72 | -0.64 | -0.26 | -0.75 | -0.58 | -0.456 |
| D2 | ?         | TC231477:f                  | -0.16 | -0.30 | -0.22 | -0.72 | -0.33 | -0.31 | -1.01 | -0.61 | -0.457 |
| D2 | CD74      | 11833:16274_CL1Contig2:r    | -0.47 | -0.32 | -0.51 | -0.72 | -0.90 | -0.26 | -0.29 | -0.25 | -0.465 |
| D2 | ?         | 13504:24692_49339578:f      | -0.72 | -0.43 | -0.09 | -0.73 | -0.47 | -0.42 | -0.44 | -0.43 | -0.466 |
| D2 | S100A2    | 9662:10691_CL2Contig1:r     | -0.34 | -0.26 | -1.01 | -0.62 | -0.49 | -0.26 | -0.54 | -0.25 | -0.471 |
| D2 | ?         | TC209911:f                  | -0.99 | -0.51 | 0.13  | -0.37 | -0.37 | -0.58 | -0.78 | -0.32 | -0.474 |
| D2 | RARS      | TC210449:f                  | -0.38 | -0.54 | -0.27 | -0.71 | -0.37 | -0.38 | -0.52 | -0.66 | -0.479 |
| D2 | ?         | 12044:42948_CL1Contig1:f    | -0.34 | -0.34 | -1.20 | -0.54 | -0.37 | -0.35 | -0.19 | -0.55 | -0.485 |
| D2 | HLA-DQB1  | 33766:10014_CL1Contig9:f    | -0.55 | -0.28 | -0.69 | -0.42 | -0.42 | -0.28 | -0.43 | -0.81 | -0.485 |
| D2 | RPS15     | 30798:10974_29278381:r      | -0.27 | -0.28 | -0.01 | -0.71 | -0.53 | -0.50 | -1.12 | -0.49 | -0.489 |
| D2 | LOC207810 | TC225421:f                  | -0.55 | -0.60 | 0.54  | -0.66 | -0.33 | -0.79 | -1.03 | -0.51 | -0.491 |
| D2 | GNB2L1    | 12412:10990_CL1Contig4:f    | -0.75 | -0.42 | -0.09 | -0.47 | -0.38 | -0.66 | -0.60 | -0.56 | -0.491 |
| D2 | ?         | 35370:45360_CL773Contig1:f  | -0.75 | -0.49 | -0.19 | -0.87 | -0.41 | -0.52 | -0.25 | -0.55 | -0.504 |
| D2 | FGL2      | 10543:45360_CL68Contig1:f   | -0.67 | -0.25 | -0.74 | -0.34 | -0.24 | -0.37 | -0.78 | -0.64 | -0.504 |
| D2 | ?         | 16773:16113_CL1Contig1:f    | -0.71 | -0.43 | -0.28 | -0.52 | -0.43 | -0.61 | -0.57 | -0.54 | -0.511 |
| D2 | C3orf63   | 6877:4285_CL1Contig1:r      | -0.69 | -0.47 | -0.12 | -0.80 | -0.58 | -0.66 | -0.47 | -0.30 | -0.511 |
| D2 | ARMC5     | TC237859:f                  | -0.72 | -0.25 | -0.63 | -0.66 | -0.99 | -0.26 | -0.26 | -0.33 | -0.513 |
| D2 | NDUFB5    | 35063:8348_CL1Contig1:r     | -0.50 | -0.31 | -0.62 | -0.99 | -0.65 | -0.42 | -0.33 | -0.30 | -0.515 |
| D2 | SMC6      | 13663:8276_CL1Contig2:f     | -0.51 | -0.40 | -0.24 | -0.62 | -0.83 | -0.36 | -0.60 | -0.57 | -0.517 |
| D2 | ?         | TC202521:f                  | -0.96 | -0.55 | 0.63  | -0.65 | -0.43 | -0.65 | -0.90 | -0.69 | -0.525 |
| D2 | ?         | TC223854:f                  | -0.66 | -0.37 | -0.03 | -0.87 | -0.33 | -0.50 | -0.87 | -0.57 | -0.525 |
| D2 | ?         | TC233081:f                  | -0.47 | -0.52 | 0.24  | -1.51 | -0.15 | -0.63 | -0.57 | -0.60 | -0.526 |
| D2 | IVNS1ABP  | 34105:19113_CL2Contig1:f    | -0.42 | -0.68 | -0.48 | -0.46 | -0.37 | -0.75 | -0.46 | -0.62 | -0.530 |
| D2 | FKBP5     | 7109:20096_54533856:f       | -0.90 | -0.42 | -0.38 | -0.66 | -0.33 | -0.51 | -0.31 | -0.78 | -0.535 |
| D2 | MarR      | TC222992:f                  | -1.06 | -0.47 | 0.08  | -0.84 | -0.42 | -0.53 | -0.63 | -0.48 | -0.543 |
| D2 | CEBPD     | 17184:7423_CL1Contig3:f     | -0.59 | -0.39 | -0.32 | -0.83 | -0.23 | -0.43 | -0.71 | -0.86 | -0.545 |
| D2 | KLRD1     | 33849:45360_CL788Contig1:r  | -0.66 | -0.38 | -0.78 | -0.73 | -0.22 | -0.54 | -0.49 | -0.61 | -0.551 |
| D2 | Bem4613   | 35208:32698_51349760:r      | -0.71 | -0.52 | 0.26  | -0.91 | -0.43 | -0.60 | -0.84 | -0.77 | -0.565 |
| D2 | S100A6    | 9665:21623_CL1Contig2:f     | -0.91 | -0.46 | -0.56 | -0.27 | 0.05  | -0.38 | -1.32 | -0.70 | -0.569 |
| D2 | ITGB1BP2  | 9955:11958_CL2Contig1:r     | -0.50 | -0.45 | -0.39 | -0.91 | -0.58 | -0.56 | -0.90 | -0.27 | -0.570 |
| D2 | RecF      | TC225916:f                  | -0.83 | -0.64 | 0.01  | -0.80 | -0.43 | -0.47 | -0.72 | -0.72 | -0.575 |
| D2 | ?         | TC203104:f                  | -0.43 | -0.48 | -0.73 | -0.69 | -0.49 | -0.48 | -0.60 | -0.84 | -0.592 |
| D2 | ESD       | 1886:12143_CL1Contig1:r     | -0.10 | -0.35 | 0.21  | -0.85 | -0.76 | -0.90 | -1.16 | -0.87 | -0.598 |
| D2 | ?         | TC205773:f                  | -0.61 | -0.63 | 0.54  | -1.22 | -0.81 | -0.73 | -0.79 | -0.59 | -0.605 |
| D2 | ?         | 35243:45360_C0007308g24-7:f | -0.80 | -0.51 | 0.03  | -1.09 | -0.52 | -0.61 | -0.61 | -0.80 | -0.614 |
| D2 | ?         | TC222585:f                  | -0.80 | -0.56 | 0.25  | -1.06 | -1.06 | -0.69 | -0.57 | -0.47 | -0.620 |
| D2 | LOC537469 | TC222533:f                  | -1.09 | -0.46 | 0.19  | -0.58 | -0.60 | -1.07 | -0.98 | -0.45 | -0.630 |
| D2 | ?         | TC205504:f                  | -0.90 | -0.45 | -0.39 | -0.81 | -0.92 | -0.52 | -0.76 | -0.46 | -0.652 |
| D2 | ?         | 31785:7537_CL2Contig1:f     | -1.49 | -0.40 | 0.53  | -1.25 | -1.14 | -0.79 | -0.84 | 0.04  | -0.668 |
| D2 | CCL23     | 32200:6563_CL1Contig1:f     | -0.73 | -0.47 | -1.07 | -0.73 | -0.71 | -0.45 | -0.68 | -0.64 | -0.685 |
| D2 | S100A4    | 9663:10691_37985407:f       | -0.11 | -0.35 | -2.35 | -0.24 | -0.85 | -0.54 | -1.00 | -0.27 | -0.714 |
| D2 | RPS3A     | 3813:7247_CL1Contig2:f      | -1.03 | -0.44 | -0.41 | -0.66 | -0.71 | -0.55 | -1.00 | -0.94 | -0.718 |
| D2 | NAP1L1    | 11331:2100_CL1Contig2:r     | -1.46 | -0.47 | -0.46 | -1.02 | -0.59 | -0.63 | -0.91 | -0.59 | -0.766 |
| D2 | NDUFS2    | TC218189:f                  | -0.64 | -0.57 | 0.32  | -0.76 | -1.37 | -0.59 | -1.38 | -1.30 | -0.786 |

|    |         |                            |       |       |       |       |       |       |       |       |        |
|----|---------|----------------------------|-------|-------|-------|-------|-------|-------|-------|-------|--------|
| D2 | CYTB    | 4342:20951_CL1Contig2:f    | -0.75 | -0.54 | -0.89 | -1.25 | -0.65 | -0.95 | -0.71 | -0.79 | -0.816 |
| D2 | IL20RB  | 288:11045_CL1Contig1:f     | -1.33 | -0.45 | -1.07 | -0.81 | -0.90 | -0.63 | -0.97 | -0.50 | -0.833 |
| D2 | KLRK1   | 30875:45360_CL723Contig1:f | -1.33 | -0.58 | -1.25 | -0.82 | -0.98 | -0.65 | -0.85 | -0.86 | -0.915 |
| D2 | MT-CYTB | 17635:20951_29287598:r     | -0.66 | -0.51 | -0.36 | -1.48 | -0.62 | -1.23 | -1.47 | -1.26 | -0.949 |
| D2 | VIM     | 2392:45360_CL5Contig6:f    | -1.11 | -0.58 | -1.90 | -0.69 | -1.89 | -0.67 | -0.97 | -0.77 | -1.072 |
| D2 | CCL5    | 5041:117_CL4Contig1:r      | -1.56 | -0.38 | -2.03 | -1.04 | -1.17 | -0.78 | -1.46 | -0.93 | -1.169 |
| D3 | CXCL10  | 11504:20822_CL1Contig1:f   | 4.21  | 2.34  | 3.66  | 1.09  | 4.34  | 0.63  | 4.25  | 1.93  | 2.807  |
| D3 | IFIT3   | 19897:4950_CL3Contig1:f    | 2.70  | 1.98  | 2.20  | 1.31  | 5.68  | 2.02  | 1.97  | 1.81  | 2.459  |
| D3 | HERC5   | 10615:35840_CL7Contig1:r   | 2.06  | 1.74  | 1.91  | 1.32  | 3.92  | 1.53  | 2.52  | 1.40  | 2.051  |
| D3 | IFIH1   | 6041:45360_CL586Contig1:r  | 1.96  | 1.88  | 1.67  | 1.70  | 3.24  | 1.59  | 2.15  | 1.66  | 1.982  |
| D3 | ISG20   | NM_001005351.2             | 2.86  | 1.55  | 1.94  | 1.32  | 3.29  | 1.54  | 1.14  | 1.41  | 1.881  |
| D3 | OAS1    | 30554:6613_CL1Contig1:r    | 2.39  | 1.57  | 1.56  | 1.34  | 3.77  | 1.53  | 1.56  | 1.21  | 1.867  |
| D3 | IFIT1   | 8190:4950_CL1Contig1:f     | 1.91  | 1.61  | 2.04  | 1.28  | 3.47  | 1.55  | 1.64  | 1.32  | 1.852  |
| D3 | EPSTI1  | 1866:18535_CL1Contig1:f    | 2.17  | 1.89  | 2.03  | 1.15  | 2.16  | 1.55  | 1.93  | 1.35  | 1.778  |
| D3 | XAF1    | 5248:36876_CL1Contig2:r    | 2.04  | 1.17  | 1.81  | 1.15  | 3.36  | 1.58  | 1.39  | 1.07  | 1.696  |
| D3 | MX1     | 334:5560_CL1Contig1:r      | 1.16  | 1.65  | 1.77  | 1.27  | 3.45  | 1.59  | 1.49  | 1.14  | 1.689  |
| D3 | IFI44   | 16784:18661_CL2Contig1:r   | 1.37  | 1.71  | 1.76  | 1.13  | 2.81  | 1.63  | 1.62  | 1.20  | 1.654  |
| D3 | CLEC12A | 10820:13877_40430145:r     | 0.70  | 1.27  | 1.20  | 1.02  | 2.93  | 1.77  | 1.64  | 1.28  | 1.476  |
| D3 | NRG1    | 34465:6810_CL1Contig1:f    | 2.37  | 0.86  | 1.31  | 0.82  | 2.12  | 1.35  | 1.56  | 0.89  | 1.409  |
| D3 | FCGR1A  | 9778:5621_CL2Contig2:f     | 2.05  | 0.52  | 0.59  | 1.23  | 2.43  | 1.73  | 1.52  | 1.05  | 1.390  |
| D3 | HERC6   | 10616:35840_CL8Contig1:r   | 1.08  | 1.66  | 1.84  | 0.61  | 1.17  | 0.92  | 1.94  | 0.99  | 1.277  |
| D3 | NT5C3   | 10635:8497_CL2Contig1:f    | 0.64  | 1.35  | 0.60  | 1.34  | 1.23  | 1.59  | 1.61  | 1.47  | 1.229  |
| D3 | ?       | 9758:24019_CL1Contig1:r    | 1.54  | 0.28  | 0.92  | 0.59  | 2.09  | 1.20  | 1.96  | 1.20  | 1.223  |
| D3 | HSPA1A  | 19776:24927_CL3Contig3:r   | 2.17  | 0.82  | 0.88  | 0.65  | 1.40  | 1.21  | 1.60  | 0.89  | 1.202  |
| D3 | ANG     | 940:12701_CL1Contig1:f     | 1.81  | 0.76  | 1.03  | 0.64  | 1.37  | 1.28  | 1.55  | 1.06  | 1.188  |
| D3 | CLEC4E  | 478:45360_CL514Contig1:r   | 1.90  | 0.88  | 0.57  | 1.01  | 0.84  | 1.17  | 1.41  | 1.31  | 1.136  |
| D3 | SAMD9   | 15671:5134_CL1Contig1:f    | 1.99  | 0.49  | 0.79  | 0.60  | 1.82  | 0.49  | 1.91  | 0.79  | 1.110  |
| D3 | NMI     | 5976:15972_CL1Contig1:r    | 0.99  | 1.00  | 0.85  | 0.63  | 1.85  | 1.14  | 1.14  | 1.00  | 1.075  |
| D3 | CASP4   | 2786:12475_CL2Contig1:r    | 1.57  | 0.53  | 0.77  | 0.78  | 1.74  | 1.26  | 1.14  | 0.69  | 1.060  |
| D3 | CCRL2   | 33938:16197_29279993:r     | 1.82  | 0.67  | 0.57  | 0.97  | 0.78  | 1.18  | 1.23  | 1.12  | 1.043  |
| D3 | ?       | TC226654:f                 | 1.31  | 1.26  | 1.47  | 0.54  | 1.11  | 0.94  | 0.91  | 0.73  | 1.033  |
| D3 | CASP1   | 2787:12475_CL1Contig1:r    | 1.18  | 0.86  | 0.77  | 0.63  | 1.41  | 1.46  | 1.09  | 0.76  | 1.020  |
| D3 | GBP2    | 18272:28721_CL3Contig1:f   | 0.89  | 0.79  | 1.09  | 0.78  | 1.49  | 1.41  | 0.82  | 0.75  | 1.003  |
| D3 | PSMA6   | 6559:7716_CL1Contig1:r     | 1.03  | 0.59  | 0.46  | 0.76  | 1.46  | 1.64  | 0.95  | 0.71  | 0.950  |
| D3 | HK3     | 19012:1489_CL2Contig1:f    | 1.66  | 0.95  | 1.15  | 0.58  | 0.56  | 0.78  | 1.03  | 0.85  | 0.945  |
| D3 | HSP90B1 | 19037:6424_CL1Contig1:r    | 1.08  | 1.33  | 0.97  | 0.82  | 1.03  | 0.80  | 0.41  | 1.03  | 0.933  |
| D3 | IFI6    | 6641:21023_CL1Contig1:r    | 1.47  | 0.66  | 0.96  | 0.47  | 1.25  | 0.79  | 1.12  | 0.70  | 0.928  |
| D3 | GBP1    | 13822:28721_CL1Contig2:r   | 0.83  | 1.12  | 0.83  | 1.05  | 0.78  | 1.15  | 0.89  | 0.76  | 0.926  |
| D3 | PPA1    | 8677:421_CL1Contig1:f      | 1.65  | 0.88  | 0.67  | 0.62  | 0.72  | 1.04  | 0.73  | 1.04  | 0.919  |
| D3 | RHBDL1  | 19837:2976_CL1Contig1:r    | 1.52  | 0.43  | 0.56  | 0.65  | 1.86  | 0.40  | 1.33  | 0.59  | 0.918  |
| D3 | KLRF1   | 33260:45360_51353975:r     | 1.42  | 0.88  | 0.47  | 0.52  | 0.99  | 1.02  | 1.12  | 0.88  | 0.912  |
| D3 | STAT2   | 11310:15518_CL4Contig1:f   | 1.03  | 0.82  | 1.14  | 0.75  | 1.23  | 0.95  | 0.57  | 0.79  | 0.910  |
| D3 | LAMP2   | 17879:1544_CL1Contig1:r    | 0.98  | 0.80  | 0.65  | 0.60  | 1.77  | 0.48  | 1.34  | 0.63  | 0.907  |
| D3 | DHRS3   | 3623:13909_CL1Contig1:r    | 1.03  | 0.72  | 0.84  | 0.76  | 2.00  | 0.38  | 0.84  | 0.68  | 0.907  |
| D3 | DNAJA1  | 11334:7676_CL1Contig3:r    | 1.33  | 0.45  | 0.37  | 0.62  | 0.81  | 1.39  | 1.38  | 0.80  | 0.894  |
| D3 | ?       | TC238171:f                 | 1.35  | 0.22  | 0.60  | 0.50  | 1.62  | 0.83  | 1.09  | 0.71  | 0.865  |
| D3 | ?       | 9096:16108_CL1Contig2:r    | 0.91  | 0.98  | 0.69  | 0.94  | 1.05  | 1.07  | 0.58  | 0.64  | 0.857  |
| D3 | LCN2    | 1412:20027_CL1Contig1:r    | 1.49  | 0.56  | 0.28  | 0.22  | 0.76  | 1.09  | 1.13  | 1.30  | 0.854  |
| D3 | RGS1    | 3382:854_5823136:f         | 0.52  | 0.68  | 0.97  | 0.58  | 0.05  | 1.06  | 1.12  | 1.85  | 0.854  |
| D3 | CCL8    | 16011:7770_CL2Contig1:r    | 1.16  | 0.48  | 0.93  | 0.41  | 1.83  | 0.66  | 0.88  | 0.39  | 0.843  |

|    |           |                             |      |      |      |       |      |       |      |      |       |
|----|-----------|-----------------------------|------|------|------|-------|------|-------|------|------|-------|
| D3 | SPINK4    | 17453:23318_257597:f        | 0.60 | 0.69 | 0.40 | 1.15  | 0.63 | 0.93  | 1.34 | 0.96 | 0.837 |
| D3 | USP18     | 15714:14279_CL1Contig1:r    | 0.85 | 0.65 | 1.12 | 0.51  | 0.83 | 0.98  | 1.11 | 0.61 | 0.833 |
| D3 | TPM4      | 11990:44862_CL3Contig1:r    | 1.12 | 0.72 | 0.82 | -0.05 | 1.38 | 0.40  | 1.32 | 0.94 | 0.831 |
| D3 | HSPB1     | 30978:621_CL1Contig1:f      | 1.13 | 0.42 | 0.61 | 0.59  | 1.22 | 0.66  | 1.16 | 0.83 | 0.828 |
| D3 | CCL3L1    | 19552:117_CL3Contig2:f      | 1.28 | 0.50 | 0.61 | 0.50  | 0.96 | 1.16  | 0.79 | 0.70 | 0.813 |
| D3 | ZCCHC6    | 30384:4571_CL1Contig1:r     | 1.05 | 0.68 | 0.44 | 0.39  | 0.84 | 1.14  | 0.92 | 0.78 | 0.780 |
| D3 | BIRC3     | 14134:6750_CL1Contig1:f     | 1.09 | 0.67 | 0.74 | 0.33  | 0.50 | 0.90  | 1.00 | 0.99 | 0.778 |
| D3 | NBN       | 2580:25557_CL1Contig1:f     | 0.46 | 0.71 | 0.39 | 0.98  | 0.90 | 1.43  | 0.70 | 0.61 | 0.773 |
| D3 | ?         | 3943:35388_CL1Contig1:r     | 1.00 | 0.23 | 0.78 | 0.12  | 0.89 | 0.96  | 1.56 | 0.62 | 0.770 |
| D3 | GGH       | 13656:5720_CL1Contig1:f     | 1.48 | 0.60 | 1.26 | 0.40  | 0.90 | 0.12  | 0.83 | 0.50 | 0.761 |
| D3 | PARP9     | 531:2579_CL1Contig1:r       | 0.87 | 0.53 | 0.89 | 0.62  | 0.77 | 1.00  | 0.76 | 0.64 | 0.760 |
| D3 | S100A9    | 9818:11373_CL3Contig1:f     | 0.46 | 1.15 | 0.74 | 0.32  | 0.65 | 0.76  | 1.36 | 0.59 | 0.754 |
| D3 | BID       | 10964:30404_CL1Contig2:r    | 0.59 | 0.40 | 0.65 | 0.24  | 1.11 | 0.93  | 1.60 | 0.38 | 0.737 |
| D3 | KYNU      | 31503:12219_CL1Contig1:f    | 0.68 | 0.68 | 0.14 | 0.87  | 0.80 | 1.27  | 0.76 | 0.69 | 0.735 |
| D3 | SNX10     | 10692:8691_CL1Contig2:r     | 1.30 | 0.57 | 0.61 | 0.47  | 0.50 | 0.34  | 1.26 | 0.62 | 0.709 |
| D3 | LGALS3BP  | 4877:7567_CL1Contig1:r      | 1.22 | 0.48 | 1.01 | 0.31  | 0.84 | 0.46  | 0.95 | 0.27 | 0.693 |
| D3 | HSH2D     | 11991:15444_CL1Contig1:r    | 0.85 | 0.52 | 0.63 | 0.66  | 0.86 | 0.76  | 0.67 | 0.56 | 0.689 |
| D3 | GVIN1     | 30427:8351_CL3Contig1:f     | 0.33 | 0.96 | 0.88 | 0.74  | 0.53 | 0.97  | 0.52 | 0.57 | 0.688 |
| D3 | TAP1      | 7079:45360_CL293Contig1:f   | 0.72 | 0.69 | 0.79 | 0.14  | 1.16 | 0.74  | 0.87 | 0.31 | 0.678 |
| D3 | ZNF313    | TC199538:f                  | 0.06 | 0.87 | 0.55 | 0.35  | 0.42 | 1.16  | 1.02 | 0.82 | 0.656 |
| D3 | GABBR1    | 7329:32384_CL1Contig1:f     | 0.08 | 0.89 | 0.60 | 0.62  | 1.35 | 0.70  | 0.54 | 0.47 | 0.656 |
| D3 | BCL2A1    | 6514:4804_CL1Contig1:f      | 0.96 | 0.39 | 0.34 | 0.35  | 0.80 | 0.40  | 1.28 | 0.70 | 0.653 |
| D3 | PGA3      | 9882:45360_540096:f         | 0.87 | 0.42 | 0.62 | 0.48  | 1.22 | 0.06  | 0.93 | 0.58 | 0.647 |
| D3 | IRF7      | 8940:6822_CL1Contig1:f      | 0.42 | 0.55 | 0.91 | 0.36  | 0.45 | 0.67  | 1.16 | 0.60 | 0.639 |
| D3 | HIST1H2BM | 7331:795_CL1Contig6:f       | 0.76 | 0.56 | 0.59 | 0.53  | 0.33 | 1.12  | 0.59 | 0.60 | 0.635 |
| D3 | LOC132699 | 5858:2829_4717223:f         | 0.63 | 0.79 | 0.62 | 0.24  | 1.04 | 0.71  | 0.42 | 0.59 | 0.630 |
| D3 | ?         | 17255:2829_CL1Contig1:f     | 0.84 | 0.42 | 1.19 | 0.11  | 0.63 | 0.54  | 0.83 | 0.45 | 0.626 |
| D3 | TCIRG1    | 8854:2312_CL1Contig1:f      | 0.86 | 0.25 | 0.42 | 0.19  | 0.84 | 1.20  | 0.96 | 0.29 | 0.626 |
| D3 | CNIH4     | 3402:15321_CL1Contig1:f     | 0.44 | 0.90 | 0.17 | 0.68  | 0.87 | 0.95  | 0.59 | 0.39 | 0.624 |
| D3 | FYB       | 6243:19876_CL1Contig1:f     | 0.42 | 0.90 | 0.65 | 0.44  | 0.39 | 0.69  | 0.63 | 0.79 | 0.614 |
| D3 | CD69      | 10823:45360_C0007760d20-7:f | 0.42 | 0.65 | 0.92 | 0.11  | 0.65 | 0.43  | 0.96 | 0.70 | 0.605 |
| D3 | MEX3C     | 17563:23897_CL2Contig1:f    | 0.21 | 0.67 | 0.32 | 0.85  | 0.93 | 0.22  | 0.84 | 0.81 | 0.605 |
| D3 | SAMSN1    | 403:2532_CL2Contig1:r       | 0.77 | 0.65 | 0.74 | 0.23  | 0.60 | 0.66  | 0.41 | 0.70 | 0.595 |
| D3 | JAK2      | 14121:25073_CL5Contig1:f    | 0.68 | 0.48 | 0.22 | 0.45  | 0.39 | 0.33  | 1.34 | 0.76 | 0.581 |
| D3 | MED6      | 717:3349_CL1Contig1:r       | 0.39 | 0.55 | 0.54 | 0.45  | 1.01 | 0.68  | 0.60 | 0.37 | 0.574 |
| D3 | PLAC8     | 17585:4705_54527068:f       | 1.10 | 0.35 | 0.51 | 0.59  | 0.42 | -0.01 | 0.99 | 0.61 | 0.570 |
| D3 | ADRA2B    | TC230424:f                  | 0.57 | 0.34 | 0.00 | 0.52  | 0.51 | 1.05  | 0.59 | 0.96 | 0.568 |
| D3 | ?         | 13683:9184_CL5Contig1:r     | 0.68 | 0.28 | 0.36 | 0.31  | 0.23 | 0.80  | 1.23 | 0.60 | 0.561 |
| D3 | FCN2      | NM_214160.1                 | 1.29 | 0.21 | 0.34 | 0.55  | 0.56 | 0.67  | 0.45 | 0.36 | 0.554 |
| D3 | ?         | 8909:1902_49325697:f        | 0.78 | 0.55 | 0.92 | 0.31  | 0.52 | 0.24  | 0.79 | 0.28 | 0.549 |
| D3 | OPTN      | 13759:11780_CL1Contig1:r    | 0.57 | 0.63 | 0.32 | 0.60  | 0.37 | 0.65  | 0.65 | 0.60 | 0.548 |
| D3 | ZDHHC24   | 32787:18248_40436501:f      | 0.61 | 0.53 | 0.34 | 0.59  | 0.70 | -0.03 | 1.02 | 0.61 | 0.545 |
| D3 | USP25     | 16488:863_CL1Contig2:r      | 0.60 | 0.19 | 0.77 | 0.32  | 0.23 | 0.72  | 1.11 | 0.36 | 0.538 |
| D3 | PRNPIP    | 18306:45360_CL192Contig1:f  | 0.43 | 0.67 | 0.36 | 0.49  | 0.64 | 0.82  | 0.34 | 0.52 | 0.534 |
| D3 | FUNDC1    | 15500:11574_CL2Contig1:r    | 0.67 | 0.46 | 0.53 | 0.95  | 0.74 | -0.13 | 0.46 | 0.58 | 0.533 |
| D3 | PTPN12    | 17725:4199_CL2Contig1:f     | 0.41 | 0.34 | 0.28 | 0.73  | 0.53 | 0.83  | 0.39 | 0.74 | 0.531 |
| D3 | USP15     | 18134:6604_CL4Contig1:f     | 0.89 | 0.22 | 0.46 | 0.38  | 0.87 | 0.67  | 0.51 | 0.24 | 0.530 |
| D3 | POLR2K    | 2775:19486_CL1Contig1:r     | 0.65 | 0.28 | 0.24 | 0.81  | 0.35 | 0.83  | 0.60 | 0.45 | 0.526 |
| D3 | VPS24     | 1760:14639_CL1Contig1:r     | 1.03 | 0.40 | 0.73 | 0.43  | 0.42 | 0.04  | 0.61 | 0.55 | 0.526 |
| D3 | CLIC2     | 17015:20095_CL2Contig1:r    | 0.71 | 0.51 | 0.10 | 0.66  | 0.36 | 0.50  | 0.79 | 0.57 | 0.524 |

|    |           |                            |      |      |      |      |      |       |      |      |       |
|----|-----------|----------------------------|------|------|------|------|------|-------|------|------|-------|
| D3 | ?         | 19947:11498_34169823:f     | 0.55 | 0.32 | 0.49 | 0.85 | 0.58 | -0.14 | 0.84 | 0.63 | 0.515 |
| D3 | B2M       | 773:865_CL1Contig3:f       | 0.45 | 0.69 | 0.48 | 0.05 | 0.89 | 0.35  | 0.82 | 0.35 | 0.510 |
| D3 | ALB       | 19926:14213_CL1Contig1:r   | 0.37 | 0.65 | 0.37 | 0.49 | 0.60 | 0.23  | 0.65 | 0.65 | 0.501 |
| D3 | C15orf21  | 32927:43374_CL1Contig1:f   | 0.81 | 0.40 | 0.61 | 0.14 | 0.72 | 0.46  | 0.41 | 0.41 | 0.495 |
| D3 | NFKBIZ    | 1659:5625_49916839:r       | 0.78 | 0.49 | 0.28 | 0.09 | 0.50 | 0.58  | 0.67 | 0.54 | 0.492 |
| D3 | TDRD7     | 12815:2278_CL1Contig1:f    | 1.03 | 0.26 | 0.43 | 0.66 | 0.35 | 0.21  | 0.63 | 0.35 | 0.491 |
| D3 | BNIP3L    | 14520:10317_CL2Contig1:r   | 0.53 | 0.18 | 0.46 | 0.13 | 0.84 | 0.23  | 0.74 | 0.80 | 0.489 |
| D3 | TRIM38    | 7353:45360_CL198Contig1:f  | 0.47 | 0.38 | 0.14 | 0.48 | 1.01 | 0.21  | 0.63 | 0.56 | 0.484 |
| D3 | SSR1      | 7418:8616_CL1Contig1:f     | 0.84 | 0.28 | 0.26 | 0.27 | 0.39 | 0.69  | 0.54 | 0.58 | 0.481 |
| D3 | MOV10     | 9861:11234_CL1Contig1:f    | 0.34 | 0.86 | 0.79 | 0.32 | 0.44 | 0.37  | 0.40 | 0.33 | 0.481 |
| D3 | NPHS1     | 32494:45360_CL103Contig1:f | 0.47 | 0.45 | 0.34 | 0.35 | 0.44 | 0.58  | 0.72 | 0.45 | 0.476 |
| D3 | AIFM1     | 10133:45259_CL1Contig1:r   | 0.30 | 0.32 | 0.48 | 0.20 | 0.51 | 1.02  | 0.64 | 0.33 | 0.475 |
| D3 | CFLAR     | 16700:38522_CL1Contig2:r   | 0.73 | 0.22 | 0.41 | 0.17 | 0.42 | 0.64  | 0.77 | 0.41 | 0.472 |
| D3 | PSMA5     | 9848:12850_CL1Contig1:r    | 0.43 | 0.39 | 0.45 | 0.67 | 0.45 | 0.38  | 0.72 | 0.27 | 0.470 |
| D3 | SELL      | 3457:7293_CL1Contig1:f     | 0.30 | 0.72 | 0.39 | 0.02 | 0.47 | 0.44  | 0.83 | 0.59 | 0.470 |
| D3 | CD47      | 457:18584_51304632:r       | 0.64 | 0.55 | 0.09 | 0.55 | 0.51 | 0.18  | 0.57 | 0.64 | 0.466 |
| D3 | PANK2     | 2516:8928_CL1Contig1:r     | 0.32 | 0.41 | 0.29 | 0.68 | 0.60 | 0.20  | 0.52 | 0.70 | 0.465 |
| D3 | PSMA1     | 3094:12940_CL3Contig1:f    | 0.23 | 0.63 | 0.46 | 0.05 | 0.74 | 0.63  | 0.54 | 0.40 | 0.460 |
| D3 | GNG10     | 12609:7628_CL1Contig1:f    | 0.70 | 0.06 | 0.26 | 0.36 | 0.35 | 0.65  | 0.36 | 0.93 | 0.458 |
| D3 | HSPA9     | 11795:24927_CL4Contig1:f   | 0.50 | 0.32 | 0.87 | 0.20 | 0.29 | 0.53  | 0.49 | 0.46 | 0.458 |
| D3 | RHEB      | 20044:32199_CL5Contig1:r   | 0.41 | 0.56 | 0.79 | 0.11 | 0.59 | 0.30  | 0.61 | 0.27 | 0.455 |
| D3 | TNC       | 12624:45360_CL225Contig1:f | 0.58 | 0.18 | 0.02 | 0.62 | 0.43 | 0.68  | 0.73 | 0.35 | 0.448 |
| D3 | UBB       | 19586:629_CL1Contig3:r     | 0.38 | 0.53 | 0.24 | 0.53 | 0.48 | 0.74  | 0.04 | 0.64 | 0.448 |
| D3 | PDIA3     | 19678:6018_CL3Contig1:r    | 0.31 | 0.55 | 0.53 | 0.32 | 0.29 | 0.68  | 0.58 | 0.31 | 0.446 |
| D3 | HNRNPA2B1 | 15708:45360_CL40Contig2:r  | 0.20 | 0.69 | 0.74 | 0.27 | 0.38 | 0.41  | 0.29 | 0.59 | 0.446 |
| D3 | TAP2      | 7077:45360_CL224Contig1:f  | 0.35 | 0.26 | 0.59 | 0.50 | 0.80 | 0.57  | 0.32 | 0.15 | 0.443 |
| D3 | CXCL2     | 11471:10930_CL1Contig3:f   | 0.77 | 0.22 | 0.28 | 0.48 | 0.17 | 0.48  | 0.77 | 0.31 | 0.435 |
| D3 | C10orf58  | 2904:9809_CL1Contig2:f     | 0.14 | 0.58 | 0.36 | 0.41 | 0.33 | 0.23  | 0.59 | 0.82 | 0.433 |
| D3 | IL1A      | 1722:5552_CL1Contig1:r     | 0.88 | 0.24 | 0.23 | 0.13 | 0.54 | 0.54  | 0.55 | 0.35 | 0.432 |
| D3 | ?         | 905:23059_CL1Contig1:r     | 0.15 | 0.34 | 0.33 | 0.45 | 0.44 | 0.70  | 0.52 | 0.51 | 0.430 |
| D3 | IFI16     | 34125:3432_CL2Contig1:r    | 0.30 | 0.44 | 0.39 | 0.41 | 0.83 | 0.10  | 0.48 | 0.43 | 0.422 |
| D3 | FBXO6     | 18605:7850_CL1Contig2:r    | 0.32 | 0.60 | 0.41 | 0.23 | 0.53 | 0.37  | 0.58 | 0.33 | 0.422 |
| D3 | TMBIM6    | 11174:37652_CL1Contig1:r   | 0.46 | 0.27 | 0.30 | 0.16 | 0.30 | 0.62  | 0.91 | 0.32 | 0.417 |
| D3 | IL8       | 11476:10930_CL3Contig1:r   | 0.47 | 0.51 | 0.51 | 0.11 | 0.36 | 0.33  | 0.61 | 0.40 | 0.412 |
| D3 | ?         | 34745:4119_CL3Contig1:f    | 0.15 | 0.08 | 0.23 | 0.55 | 0.63 | 0.61  | 0.59 | 0.42 | 0.408 |
| D3 | ?         | 35142:22411_CL2Contig1:f   | 0.38 | 0.35 | 0.46 | 0.10 | 0.70 | 0.17  | 0.56 | 0.53 | 0.406 |
| D3 | IRF9      | 859:23066_CL1Contig1:r     | 0.18 | 0.34 | 0.50 | 0.30 | 0.47 | 0.48  | 0.75 | 0.19 | 0.401 |
| D3 | CTSC      | 9044:8897_CL2Contig2:f     | 0.39 | 0.54 | 0.38 | 0.05 | 0.36 | 0.52  | 0.49 | 0.47 | 0.400 |
| D3 | UTP14A    | 6726:5073_CL2Contig2:f     | 0.19 | 0.16 | 0.27 | 0.35 | 0.39 | 0.76  | 0.36 | 0.69 | 0.396 |
| D3 | ?         | 5859:43064_CL1Contig1:f    | 0.49 | 0.44 | 0.28 | 0.34 | 0.06 | 0.22  | 0.83 | 0.47 | 0.391 |
| D3 | CALM1     | 20332:12477_CL16Contig1:f  | 0.46 | 0.25 | 0.07 | 0.32 | 0.39 | 0.76  | 0.51 | 0.34 | 0.388 |
| D3 | CTSZ      | 2067:4082_CL1Contig1:f     | 0.49 | 0.30 | 0.14 | 0.32 | 0.29 | 0.48  | 0.68 | 0.33 | 0.380 |
| D3 | MAGOH     | 1857:5371_CL1Contig1:f     | 0.39 | 0.31 | 0.28 | 0.60 | 0.23 | 0.56  | 0.34 | 0.32 | 0.379 |
| D3 | PSMC2     | 10563:1272_CL6Contig2:f    | 0.24 | 0.28 | 0.27 | 0.61 | 0.23 | 0.74  | 0.23 | 0.39 | 0.374 |
| D3 | NMT1      | 5502:5664_CL2Contig1:r     | 0.39 | 0.26 | 0.23 | 0.32 | 0.54 | 0.67  | 0.37 | 0.03 | 0.352 |
| D3 | EMG1      | 18945:13931_CL1Contig1:f   | 0.46 | 0.35 | 0.33 | 0.15 | 0.60 | 0.28  | 0.32 | 0.32 | 0.351 |
| D3 | MAGT1     | 14978:12797_CL1Contig1:f   | 0.18 | 0.63 | 0.42 | 0.17 | 0.47 | 0.13  | 0.43 | 0.33 | 0.345 |
| D3 | ?         | 1931:4170_CL1Contig1:r     | 0.58 | 0.02 | 0.29 | 0.30 | 0.66 | 0.35  | 0.34 | 0.21 | 0.343 |
| D3 | TRIAP1    | 3855:4227_CL1Contig1:f     | 0.19 | 0.47 | 0.51 | 0.28 | 0.03 | 0.25  | 0.58 | 0.40 | 0.339 |
| D3 | ?         | 105:7681_6987102-A:f       | 0.21 | 0.38 | 0.25 | 0.09 | 0.51 | 0.34  | 0.62 | 0.29 | 0.336 |

|    |           |                           |       |       |       |       |       |       |       |       |        |
|----|-----------|---------------------------|-------|-------|-------|-------|-------|-------|-------|-------|--------|
| D3 | INTS10    | 8554:5056_CL1Contig1:r    | 0.22  | 0.30  | 0.01  | 0.40  | 0.49  | 0.52  | 0.31  | 0.43  | 0.335  |
| D3 | WT1       | TC225866:f                | 0.08  | 0.48  | 0.21  | 0.34  | 0.46  | 0.34  | 0.51  | 0.25  | 0.334  |
| D3 | ?         | 7502:12233_CL1Contig1:r   | 0.05  | 0.32  | 0.28  | 0.15  | 0.39  | 0.50  | 0.52  | 0.43  | 0.330  |
| D3 | IFITM1    | 8910:1902_CL2Contig1:f    | 0.33  | 0.25  | 0.19  | 0.35  | 0.54  | 0.28  | 0.52  | 0.15  | 0.327  |
| D3 | FAF2      | 12393:5299_CL1Contig2:f   | 0.37  | 0.22  | 0.71  | 0.12  | 0.39  | 0.18  | 0.28  | 0.34  | 0.326  |
| D3 | ?         | 13164:19894_CL1Contig1:f  | 0.32  | 0.21  | 0.36  | 0.17  | 0.48  | 0.31  | 0.54  | 0.20  | 0.324  |
| D3 | MFSD1     | 35115:16741_CL1Contig1:r  | 0.22  | 0.43  | 0.50  | -0.06 | 0.41  | 0.34  | 0.50  | 0.21  | 0.320  |
| D3 | GARS      | 13642:28531_CL1Contig1:f  | 0.23  | 0.34  | 0.09  | 0.35  | 0.17  | 0.64  | 0.51  | 0.22  | 0.319  |
| D3 | UBE2D3    | 11626:45360_CL28Contig5:f | 0.41  | 0.23  | 0.19  | 0.23  | 0.23  | 0.65  | 0.29  | 0.30  | 0.316  |
| D3 | DHX9      | 32835:24039_49335854:f    | 0.17  | 0.33  | 0.12  | 0.22  | 0.44  | 0.49  | 0.32  | 0.34  | 0.304  |
| D3 | AHSA1     | 746:3156_CL1Contig1:r     | 0.48  | 0.04  | 0.20  | 0.32  | 0.24  | 0.50  | 0.43  | 0.19  | 0.300  |
| D3 | AHSA1     | 746:3156_CL1Contig1:r     | 0.48  | 0.04  | 0.20  | 0.32  | 0.24  | 0.50  | 0.43  | 0.19  | 0.300  |
| D3 | SKIV2L2   | 13410:30059_CL2Contig1:r  | 0.28  | 0.24  | 0.08  | 0.32  | 0.60  | 0.39  | 0.33  | 0.14  | 0.297  |
| D3 | E1F1B     | 6786:5901_CL2Contig1:r    | 0.24  | 0.24  | 0.11  | 0.12  | 0.44  | 0.34  | 0.36  | 0.21  | 0.258  |
| D3 | GSTM1     | 33801:32045_59789022:f    | 0.08  | 0.28  | 0.31  | 0.15  | 0.38  | 0.20  | 0.33  | 0.09  | 0.227  |
| D3 | NUDC      | 5872:6291_CL1Contig1:r    | 0.27  | 0.19  | 0.16  | 0.09  | 0.15  | 0.46  | 0.17  | 0.15  | 0.205  |
| D3 | RPS2      | 19808:37160_CL1Contig2:f  | -0.29 | 0.03  | 0.05  | -0.18 | 0.20  | -0.03 | -0.02 | -0.08 | -0.041 |
| D3 | HIG2      | 10316:28749_CL1Contig1:f  | -0.11 | -0.15 | -0.07 | -0.14 | -0.12 | -0.06 | -0.12 | -0.20 | -0.121 |
| D3 | AGPAT1    | 7316:10997_CL2Contig1:f   | -0.25 | -0.11 | -0.16 | -0.21 | -0.15 | -0.09 | -0.17 | -0.13 | -0.159 |
| D3 | ?         | 14481:9281_CL1Contig3-B:f | -0.20 | -0.14 | -0.20 | -0.23 | -0.23 | -0.11 | -0.18 | -0.06 | -0.169 |
| D3 | ?         | 34355:25020_34170673:f    | -0.14 | -0.14 | -0.17 | -0.24 | -0.14 | -0.13 | -0.17 | -0.23 | -0.170 |
| D3 | PTOV1     | 4202:28684_CL1Contig2:f   | -0.03 | -0.13 | -0.24 | -0.17 | -0.21 | -0.20 | -0.27 | -0.14 | -0.173 |
| D3 | ?         | 31374:648_38008898:r      | -0.24 | -0.28 | -0.17 | -0.21 | -0.06 | -0.11 | -0.20 | -0.14 | -0.175 |
| D3 | ?         | 35230:45728_CL1Contig1:r  | -0.25 | -0.10 | -0.23 | -0.12 | -0.21 | -0.09 | -0.19 | -0.22 | -0.176 |
| D3 | GPAA1     | 19267:27482_CL1Contig1:f  | -0.31 | -0.16 | -0.21 | -0.25 | -0.18 | -0.06 | -0.07 | -0.33 | -0.197 |
| D3 | CLK3      | 6521:29470_CL2Contig1:r   | -0.37 | -0.07 | -0.08 | -0.23 | -0.24 | -0.16 | -0.19 | -0.26 | -0.200 |
| D3 | WNT10B    | 11193:15065_37854987:r    | -0.24 | -0.31 | -0.09 | -0.28 | -0.07 | -0.09 | -0.29 | -0.24 | -0.201 |
| D3 | ZFYVE20   | 17270:2712_CL1Contig1:f   | -0.23 | -0.13 | -0.17 | -0.11 | -0.36 | -0.22 | -0.10 | -0.30 | -0.202 |
| D3 | ?         | 30814:23093_CL1Contig1:r  | -0.33 | -0.26 | -0.14 | -0.20 | -0.06 | -0.20 | -0.21 | -0.25 | -0.206 |
| D3 | SURF1     | 31892:22472_CL2Contig1:r  | -0.34 | -0.29 | -0.09 | -0.32 | -0.23 | -0.14 | -0.15 | -0.14 | -0.212 |
| D3 | YPEL3     | 7983:672_CL1Contig1:r     | -0.18 | -0.17 | -0.34 | -0.32 | -0.12 | -0.20 | -0.26 | -0.12 | -0.214 |
| D3 | BOP1      | 2535:7050_CL1Contig1:f    | -0.13 | -0.28 | -0.22 | -0.27 | -0.13 | -0.09 | -0.40 | -0.20 | -0.215 |
| D3 | SLC7A4    | 3802:285_CL2Contig1:r     | -0.13 | -0.28 | -0.23 | -0.32 | -0.17 | -0.09 | -0.31 | -0.21 | -0.217 |
| D3 | TTC28     | 31648:10140_15417420:r    | -0.27 | -0.23 | -0.18 | -0.21 | -0.15 | -0.24 | -0.20 | -0.27 | -0.219 |
| D3 | HEATR3    | 4473:20739_CL1Contig1:f   | -0.35 | -0.22 | -0.12 | -0.30 | -0.17 | -0.19 | -0.26 | -0.17 | -0.222 |
| D3 | PEAR1     | 681:45360_13308017:f      | -0.18 | -0.13 | -0.23 | -0.28 | -0.33 | -0.09 | -0.15 | -0.39 | -0.222 |
| D3 | POU2F2    | 32181:679_CL2Contig3:f    | -0.15 | -0.25 | -0.24 | -0.33 | -0.30 | -0.18 | -0.31 | -0.03 | -0.224 |
| D3 | HPS5      | 31634:32597_CL2Contig1:f  | -0.25 | -0.22 | -0.38 | -0.37 | -0.11 | -0.14 | -0.12 | -0.22 | -0.227 |
| D3 | KRTAP26-1 | 34959:20855_CL1Contig1:f  | -0.34 | -0.15 | -0.16 | -0.34 | -0.29 | -0.07 | -0.20 | -0.27 | -0.228 |
| D3 | ACYP2     | 32686:16833_CL2Contig1:f  | -0.31 | -0.14 | -0.33 | -0.25 | -0.14 | -0.20 | -0.20 | -0.27 | -0.230 |
| D3 | Maea      | 20108:10796_49333718:f    | -0.34 | -0.18 | -0.26 | -0.23 | -0.09 | -0.35 | -0.24 | -0.18 | -0.233 |
| D3 | PPYR1     | NM_214243.1               | -0.31 | -0.17 | -0.26 | -0.14 | -0.45 | -0.08 | -0.19 | -0.27 | -0.234 |
| D3 | TUSC4     | 6963:5479_CL1Contig1:r    | -0.38 | -0.44 | -0.11 | -0.22 | -0.23 | -0.09 | -0.19 | -0.22 | -0.235 |
| D3 | MGAT2     | 1062:14596_CL1Contig1:r   | -0.28 | -0.33 | -0.16 | -0.43 | -0.15 | -0.13 | -0.35 | -0.10 | -0.241 |
| D3 | PAFAH1B3  | 4108:4402_CL1Contig1:f    | -0.35 | -0.27 | -0.35 | -0.28 | -0.11 | -0.15 | -0.23 | -0.21 | -0.244 |
| D3 | ?         | TC227969:f                | -0.35 | -0.21 | -0.32 | -0.31 | -0.11 | -0.13 | -0.14 | -0.43 | -0.250 |
| D3 | ?         | 3709:612_CL2Contig1:f     | -0.22 | -0.27 | -0.23 | -0.31 | -0.24 | -0.09 | -0.37 | -0.28 | -0.251 |
| D3 | FANCG     | 12740:4366_CL1Contig1:r   | -0.46 | -0.32 | -0.09 | -0.19 | -0.30 | -0.21 | -0.21 | -0.25 | -0.254 |
| D3 | SLC25A6   | 10120:44685_CL1Contig1:r  | -0.52 | -0.38 | 0.03  | -0.35 | -0.15 | -0.15 | -0.26 | -0.27 | -0.256 |
| D3 | CCL14     | 5039:117_59816503:f       | -0.17 | -0.29 | -0.24 | -0.41 | -0.30 | -0.08 | -0.47 | -0.15 | -0.264 |

|    |           |                             |       |       |       |       |       |       |       |       |        |
|----|-----------|-----------------------------|-------|-------|-------|-------|-------|-------|-------|-------|--------|
| D3 | FAM38A    | 4391:3956_CL1Contig2:f      | -0.17 | -0.33 | -0.26 | -0.50 | -0.12 | -0.15 | -0.43 | -0.17 | -0.266 |
| D3 | ?         | 33023:14347_41132320:f      | -0.42 | -0.12 | -0.34 | -0.39 | -0.17 | -0.28 | -0.25 | -0.17 | -0.267 |
| D3 | COQ3      | 13077:4596_CL1Contig1:r     | -0.43 | -0.45 | -0.26 | -0.32 | -0.23 | -0.08 | -0.15 | -0.22 | -0.267 |
| D3 | DDT       | 3719:15951_CL1Contig1:r     | -0.47 | -0.37 | -0.24 | -0.36 | -0.12 | -0.20 | -0.14 | -0.24 | -0.268 |
| D3 | LAGE3     | 10197:28110_CL2Contig1:f    | -0.32 | -0.42 | -0.24 | -0.32 | -0.11 | -0.32 | -0.04 | -0.39 | -0.270 |
| D3 | ZDHHC7    | 19468:2995_CL2Contig1:f     | -0.48 | -0.21 | -0.10 | -0.23 | -0.38 | -0.32 | -0.09 | -0.37 | -0.272 |
| D3 | MRPL10    | 2307:12629_40481805:f       | -0.32 | -0.26 | -0.42 | -0.32 | -0.21 | -0.12 | -0.14 | -0.43 | -0.278 |
| D3 | NCU-G1    | 9626:9953_CL1Contig2:r      | -0.44 | -0.14 | -0.25 | -0.16 | -0.29 | -0.10 | -0.51 | -0.34 | -0.279 |
| D3 | ?         | TC214444:r                  | -0.45 | -0.18 | -0.50 | -0.26 | -0.12 | -0.20 | -0.15 | -0.40 | -0.282 |
| D3 | ZCCHC11   | 9334:4571_CL2Contig1:r      | -0.46 | -0.16 | -0.46 | -0.23 | -0.12 | -0.17 | -0.29 | -0.40 | -0.286 |
| D3 | PDE9A     | 320:9677_CL1Contig2:f       | -0.33 | -0.35 | -0.39 | -0.26 | -0.12 | -0.40 | -0.21 | -0.25 | -0.289 |
| D3 | LGALS3    | 18028:45360_CL20Contig2:f   | -0.46 | -0.07 | -0.36 | -0.31 | -0.41 | -0.46 | -0.10 | -0.22 | -0.299 |
| D3 | MRPL12    | 4845:12239_CL1Contig1:r     | -0.52 | -0.37 | -0.29 | -0.16 | -0.45 | -0.24 | -0.05 | -0.34 | -0.303 |
| D3 | LOC124761 | TC200079:f                  | -0.40 | -0.59 | -0.32 | -0.36 | -0.17 | -0.10 | -0.21 | -0.36 | -0.315 |
| D3 | ?         | 30412:15896_29287794:r      | -0.59 | -0.28 | -0.41 | -0.34 | -0.22 | -0.19 | -0.06 | -0.45 | -0.318 |
| D3 | CFD       | 33620:45360_CL17Contig1:r   | -0.46 | -0.33 | -0.27 | -0.44 | -0.36 | -0.16 | -0.11 | -0.42 | -0.319 |
| D3 | NME1      | 5360:7936_49324219:f        | -0.29 | -0.41 | -0.34 | -0.42 | -0.32 | -0.06 | -0.39 | -0.33 | -0.319 |
| D3 | IRF2BP2   | 8590:4339_CL2Contig1:r      | -0.52 | -0.28 | -0.26 | -0.47 | -0.17 | -0.26 | -0.35 | -0.27 | -0.322 |
| D3 | LRRC33    | 50:13512_CL2Contig1:r       | -0.30 | -0.43 | -0.16 | -0.23 | -0.15 | -0.21 | -0.50 | -0.64 | -0.328 |
| D3 | POLR1D    | 1947:9392_CL1Contig1:r      | -0.39 | -0.59 | -0.29 | -0.38 | -0.23 | -0.27 | -0.19 | -0.33 | -0.334 |
| D3 | SPATA4    | TC203310:f                  | -0.38 | -0.47 | -0.23 | -0.25 | -0.59 | -0.30 | -0.20 | -0.27 | -0.336 |
| D3 | MGLL      | 19692:7083_CL1Contig1:r     | -0.47 | -0.26 | -0.15 | -0.32 | -0.26 | -0.51 | -0.27 | -0.45 | -0.338 |
| D3 | ELMO3     | 4565:2475_CL1Contig1:f      | -0.45 | -0.26 | -0.39 | -0.41 | -0.20 | -0.28 | -0.23 | -0.57 | -0.349 |
| D3 | GNAS      | 34382:41223_49345464:f      | -0.51 | -0.26 | 0.00  | -0.44 | -0.17 | -0.52 | -0.57 | -0.39 | -0.358 |
| D3 | ?         | 12760:8055_CL1Contig1-B:f   | -0.48 | -0.45 | -0.67 | -0.40 | -0.07 | -0.18 | -0.16 | -0.48 | -0.362 |
| D3 | ?         | 33693:33866_21550555:r      | -0.30 | -0.76 | -0.16 | -0.49 | -0.20 | -0.35 | -0.21 | -0.56 | -0.378 |
| D3 | ZNF251    | 19272:45360_CL174Contig1:f  | -0.32 | -0.74 | -0.30 | -0.37 | -0.36 | -0.19 | -0.43 | -0.41 | -0.390 |
| D3 | ?         | TC202658:f                  | -0.54 | -0.38 | -0.75 | -0.28 | -0.60 | -0.28 | -0.11 | -0.30 | -0.405 |
| D3 | PNPLA3    | 11052:10135_CL2Contig1:r    | -0.58 | -0.47 | -0.23 | -0.05 | -0.54 | -0.27 | -0.77 | -0.59 | -0.438 |
| D3 | ?         | 17700:44684_CL1Contig1:f    | -0.59 | -0.68 | -0.13 | -0.47 | -0.39 | -0.43 | -0.32 | -0.53 | -0.443 |
| D3 | S100A2    | 9662:10691_CL2Contig1:r     | -0.57 | -0.32 | -0.28 | -0.28 | -0.42 | -0.43 | -0.56 | -0.76 | -0.453 |
| D3 | ?         | TC221562:f                  | -0.68 | -0.42 | -0.40 | -0.51 | -0.41 | -0.34 | -0.36 | -0.59 | -0.464 |
| D3 | RPL4      | 3869:4038_CL1Contig1:f      | -0.46 | -0.34 | -0.18 | -0.77 | -0.25 | -0.79 | -0.56 | -0.39 | -0.467 |
| D3 | ?         | 12044:42948_CL1Contig1:f    | -0.60 | -0.60 | -0.17 | -0.35 | -0.39 | -0.47 | -0.46 | -1.00 | -0.505 |
| D3 | SMC6      | 13663:8276_CL1Contig2:f     | -0.80 | -0.71 | -0.50 | -0.43 | -0.35 | -0.17 | -0.55 | -0.53 | -0.505 |
| D3 | CCL5      | 5041:117_CL4Contig1:r       | -0.41 | -0.82 | -0.25 | -0.42 | -0.63 | -0.73 | -0.33 | -0.45 | -0.506 |
| D3 | LCK       | 5793:34974_CL2Contig1:r     | -0.93 | -0.34 | -0.20 | -0.50 | -0.54 | -0.55 | -0.32 | -0.82 | -0.525 |
| D3 | HLA-DQB1  | 33766:10014_CL1Contig9:f    | -0.78 | -0.67 | -0.37 | -0.74 | -0.18 | -0.54 | -0.35 | -0.64 | -0.534 |
| D3 | ARMC5     | TC237859:f                  | -0.65 | -0.49 | -0.46 | -0.44 | -0.62 | -0.35 | -0.75 | -0.57 | -0.541 |
| D3 | JRKL      | 35254:45360_C0007758e03-7:f | -0.73 | -0.95 | -0.36 | -0.58 | -0.27 | -0.60 | -0.28 | -0.56 | -0.541 |
| D3 | ITGB1BP2  | 9955:11958_CL2Contig1:r     | -0.63 | -0.59 | -0.72 | -0.15 | -0.96 | -0.09 | -0.55 | -0.70 | -0.549 |
| D3 | C10       | 10852:3860_CL1Contig1:r     | -0.67 | -1.14 | -0.50 | -0.53 | -0.39 | -0.26 | -0.32 | -0.64 | -0.556 |
| D3 | MAL2      | 7165:1486_CL3Contig1:r      | -1.04 | -0.65 | -0.44 | -0.39 | -0.23 | -0.56 | -0.64 | -0.51 | -0.558 |
| D3 | ?         | TC205504:f                  | -1.21 | -0.23 | -0.68 | -0.60 | -0.72 | -0.60 | -0.37 | -0.28 | -0.586 |
| D3 | RPS15     | 30798:10974_29278381:r      | -0.80 | -0.63 | -0.60 | -0.55 | -0.36 | -0.50 | -0.51 | -0.85 | -0.600 |
| D3 | IVNS1ABP  | 34105:19113_CL2Contig1:f    | -0.87 | -0.96 | -0.54 | -0.38 | -0.47 | -0.51 | -0.51 | -0.58 | -0.603 |
| D3 | SMAD2     | 7634:4329_CL3Contig1:r      | -1.19 | -0.53 | -0.41 | -0.65 | -0.09 | -0.56 | -0.57 | -0.85 | -0.606 |
| D3 | HLA-DQA1  | 33905:2024_CL1Contig2:f     | -1.00 | -0.76 | -0.22 | -1.26 | -0.44 | -0.52 | -0.65 | -0.27 | -0.640 |
| D3 | NAP1L1    | 11331:2100_CL1Contig2:r     | -0.85 | -0.23 | -0.40 | -0.96 | -1.04 | -0.97 | -0.32 | -0.51 | -0.660 |
| D3 | ?         | TC203104:f                  | -0.98 | -0.38 | -0.79 | -0.83 | -0.62 | -0.45 | -0.42 | -0.93 | -0.675 |

## CFSV exacerbates IFN responses

P. Renson et al.

Vet. Res. (2010) 41:07

|    |           |                             |       |       |       |       |       |       |       |       |        |
|----|-----------|-----------------------------|-------|-------|-------|-------|-------|-------|-------|-------|--------|
| D3 | MEF2C     | TC228887:f                  | -0.66 | -1.22 | -0.86 | -0.56 | -0.49 | -0.21 | -0.33 | -1.08 | -0.676 |
| D3 | IL20RB    | 288:11045_CL1Contig1:f      | -0.34 | -0.68 | -0.44 | -1.16 | -0.87 | -0.89 | -0.43 | -0.72 | -0.691 |
| D3 | LOC537469 | TC222533:f                  | -1.10 | -0.34 | -0.92 | -0.23 | -1.17 | -0.60 | -1.14 | -0.43 | -0.741 |
| D3 | VIM       | 34633:45360_C0007745k17-7:f | -0.41 | -0.89 | -0.75 | -1.45 | -0.95 | -0.96 | -0.66 | -0.88 | -0.869 |
| D3 | CCL23     | 32200:6563_CL1Contig1:f     | -0.31 | -1.49 | -0.65 | -1.21 | -1.49 | -0.91 | -0.21 | -0.99 | -0.908 |
| D3 | CYTB      | TC205573:f                  | -1.15 | -1.48 | -1.39 | -0.46 | -1.67 | -0.43 | -0.78 | -2.33 | -1.211 |

Table S2. Genes which expression is modified during Paderborn infection compared to uninfected pigs. One-class SAM analysis. Values are log ratio of infected pig versus non infected pigs. DPI: Day Post Infection, Mean is the mean of the log ratio for the eight pigs (P1-P8).

| DPI | Gene Name | Oligo ID                    | Pig Number |       |       |       |       |       |       |       | Mean   |
|-----|-----------|-----------------------------|------------|-------|-------|-------|-------|-------|-------|-------|--------|
|     |           |                             | P1         | P2    | P3    | P4    | P5    | P6    | P7    | P8    |        |
| D1  | ISG15     | 3627:10624_CL1Contig1:r     | 0.24       | 1.77  | 0.36  | 2.73  | 2.06  | 0.69  | 0.25  | 1.41  | 1.189  |
| D1  | PTPRC     | 14197:22429_CL1Contig1:f    | 0.39       | 1.11  | -0.15 | 1.23  | 1.31  | 1.07  | 1.74  | 1.57  | 1.034  |
| D1  | IFIT1     | 8190:4950_CL1Contig1:f      | 1.18       | 1.60  | 0.72  | 1.89  | 1.25  | 0.64  | -0.58 | 0.86  | 0.945  |
| D1  | HSP90AB1  | 7216:6424_CL1Contig2:f      | 0.62       | 1.07  | -0.01 | 1.50  | 1.04  | 0.36  | 0.97  | 1.15  | 0.837  |
| D1  | ?         | 34842:45360_40467715:r      | 0.17       | 1.14  | -0.19 | 0.64  | 1.82  | 0.78  | 0.35  | 1.52  | 0.778  |
| D1  | IGHA2     | 33067:15889_CL1Contig104:f  | 0.27       | 0.29  | 0.12  | 1.10  | 1.30  | -0.09 | 0.99  | 1.15  | 0.641  |
| D1  | IGHA1     | 32774:15889_CL1Contig100:f  | 0.25       | 0.69  | 0.07  | 0.85  | 0.90  | 0.25  | 0.60  | 1.14  | 0.593  |
| D1  | PSMB8     | NM_213935.1                 | 0.23       | 0.45  | 0.07  | 0.54  | 0.61  | 0.01  | 0.43  | 0.86  | 0.400  |
| D1  | ?         | 32622:2512_CL3Contig1:f     | 0.27       | 0.24  | 0.18  | 0.44  | 0.45  | 0.13  | 0.37  | 0.43  | 0.314  |
| D1  | CD97      | 18993:21836_CL1Contig1:f    | 0.22       | 0.36  | 0.17  | 0.54  | 0.28  | 0.17  | 0.13  | 0.23  | 0.263  |
| D1  | CLDN2     | 10222:3846_CL9Contig1:f     | -0.14      | -0.27 | -0.17 | -0.14 | -0.32 | -0.07 | -0.27 | -0.34 | -0.215 |
| D1  | ?         | 12044:42948_CL1Contig1:f    | -0.23      | -0.10 | -0.48 | -0.21 | -0.19 | -0.33 | -0.26 | -0.17 | -0.246 |
| D1  | C12orf51  | 3649:31482_CL1Contig1:f     | -0.21      | -0.48 | -0.18 | -0.31 | -0.01 | -0.48 | -0.30 | -0.16 | -0.265 |
| D1  | HBXIP     | 31131:21063_CL1Contig2:f    | -0.38      | -0.34 | -0.43 | -0.10 | -0.17 | -0.44 | -0.29 | -0.01 | -0.270 |
| D1  | TLE2      | 12285:6309_CL2Contig1:r     | -0.25      | -0.48 | -0.15 | -0.42 | -0.12 | -0.34 | -0.14 | -0.27 | -0.272 |
| D1  | UCHL3     | TC207638:f                  | -0.38      | -0.46 | -0.29 | -0.10 | -0.05 | -0.58 | -0.26 | -0.14 | -0.283 |
| D1  | GJA4      | 18902:5411_CL1Contig1:r     | -0.26      | -0.19 | -0.20 | -0.41 | -0.33 | -0.30 | -0.19 | -0.39 | -0.284 |
| D1  | HS6ST2    | 18459:4244_CL1Contig1:r     | -0.30      | -0.40 | -0.20 | -0.31 | -0.62 | -0.07 | -0.19 | -0.29 | -0.298 |
| D1  | TLK1      | 6022:2661_34159198:f        | -0.18      | -0.53 | -0.28 | -0.17 | -0.30 | -0.39 | 0.03  | -0.57 | -0.299 |
| D1  | AR        | 15027:2453_CL2Contig1:f     | -0.30      | -0.49 | -0.40 | -0.34 | -0.15 | -0.45 | -0.07 | -0.23 | -0.303 |
| D1  | C10       | 10852:3860_CL1Contig1:r     | -0.42      | -0.59 | -0.27 | -0.11 | -0.17 | -0.28 | -0.53 | -0.09 | -0.308 |
| D1  | ?         | 12209:22662_CL1Contig1:f    | -0.35      | -0.54 | -0.41 | -0.20 | -0.23 | -0.34 | -0.16 | -0.27 | -0.311 |
| D1  | SEPX1     | 19810:7965_CL1Contig1:r     | -0.14      | -0.53 | -0.14 | -0.43 | -0.27 | -0.28 | -0.21 | -0.51 | -0.313 |
| D1  | ?         | 750:14217_CL1Contig1:r      | -0.52      | -0.36 | -0.44 | -0.17 | -0.23 | -0.60 | -0.10 | -0.09 | -0.314 |
| D1  | ART1      | 19045:17204_CL2Contig1:f    | -0.29      | -0.32 | -0.13 | -0.31 | -0.70 | -0.45 | 0.05  | -0.45 | -0.325 |
| D1  | UQCR      | 12443:7449_CL1Contig1:r     | -0.49      | -0.30 | -0.46 | -0.23 | -0.55 | -0.24 | -0.31 | -0.11 | -0.336 |
| D1  | DPY30     | 34347:6517_CL1Contig1:r     | -0.31      | -0.55 | -0.30 | -0.20 | -0.49 | -0.73 | -0.07 | -0.06 | -0.339 |
| D1  | PTPN18    | 5951:4199_CL9Contig1:f      | -0.61      | -0.55 | -0.45 | -0.07 | -0.27 | -0.48 | -0.26 | -0.03 | -0.340 |
| D1  | LMOD1     | 16805:36306_C0007306k12-7:f | -0.17      | -0.02 | -0.37 | -0.47 | -0.38 | -0.49 | -0.30 | -0.53 | -0.341 |
| D1  | KLRD1     | 33849:45360_CL788Contig1:r  | -0.51      | -0.33 | -0.20 | -0.34 | -0.17 | -0.56 | -0.46 | -0.17 | -0.343 |
| D1  | YTHDF2    | 5832:21261_CL1Contig1:r     | -0.29      | -0.38 | -0.64 | -0.23 | -0.33 | -0.57 | -0.34 | 0.02  | -0.345 |
| D1  | S100A8    | 9816:28594_CL1Contig1:r     | -0.28      | -0.40 | -0.67 | 0.01  | -0.31 | -0.53 | -0.13 | -0.48 | -0.349 |
| D1  | ERH       | 35356:3425_6962127:r        | -0.24      | -0.49 | -0.46 | -0.24 | 0.03  | -0.66 | -0.29 | -0.47 | -0.352 |
| D1  | PCBD2     | 11771:7173_CL1Contig1:r     | -0.55      | -0.50 | -0.24 | -0.21 | -0.25 | -0.48 | -0.47 | -0.13 | -0.354 |
| D1  | BNC2      | 14934:3523_37978512:r       | -0.05      | -0.63 | -0.40 | -0.59 | -0.30 | -0.36 | 0.01  | -0.51 | -0.354 |
| D1  | EXOSC8    | 1928:4887_CL1Contig1:r      | -0.39      | -0.41 | -0.52 | -0.36 | -0.32 | -0.77 | -0.19 | 0.10  | -0.357 |
| D1  | ITGB1BP2  | 9955:11958_CL2Contig1:r     | -0.35      | -0.25 | -0.39 | -0.54 | -0.16 | -0.76 | -0.26 | -0.21 | -0.366 |
| D1  | ?         | TC207758:f                  | -0.30      | -0.74 | -0.04 | -0.39 | -0.21 | -0.82 | -0.03 | -0.46 | -0.374 |
| D1  | ?         | 30496:28608_CL2Contig1:f    | -0.81      | -0.69 | -0.43 | 0.00  | -0.33 | -0.31 | -0.24 | -0.31 | -0.390 |
| D1  | S100A6    | 9665:21623_CL1Contig2:f     | -0.58      | -0.67 | -0.43 | -0.41 | -0.52 | -0.50 | -0.01 | -0.15 | -0.409 |
| D1  | ?         | TC203544:f                  | -0.23      | -0.84 | -0.69 | -0.50 | 0.04  | -0.67 | -0.23 | -0.21 | -0.416 |

|    |          |                           |       |       |       |       |       |       |       |       |        |
|----|----------|---------------------------|-------|-------|-------|-------|-------|-------|-------|-------|--------|
| D1 | RHOQ     | 18543:2876_CL6Contig1:f   | -0.48 | -0.51 | -0.28 | -0.41 | -0.23 | -0.90 | -0.54 | -0.16 | -0.439 |
| D1 | UQCRB    | 32094:2514_CL1Contig2:f   | -0.57 | -0.82 | -0.37 | -0.53 | -0.40 | -0.80 | 0.06  | -0.09 | -0.440 |
| D1 | MRPL52   | 18510:26326_CL1Contig1:f  | -0.82 | -0.46 | -0.59 | -0.06 | -0.34 | -0.52 | -0.81 | 0.07  | -0.441 |
| D1 | ?        | TC222889:f                | -0.53 | -0.76 | -0.38 | -0.37 | -0.42 | -0.79 | -0.57 | -0.03 | -0.481 |
| D1 | CYTB     | TC205573:f                | -0.59 | -1.52 | -0.61 | -1.23 | -0.69 | -1.43 | -0.81 | -0.11 | -0.874 |
| D2 | IFIT3    | 19897:4950_CL3Contig1:f   | 0.34  | 3.26  | 2.21  | 3.05  | 1.55  | 2.05  | 2.75  | 1.17  | 2.047  |
| D2 | EPSTI1   | 1866:18535_CL1Contig1:f   | 0.31  | 3.35  | 1.51  | 2.41  | 1.83  | 1.85  | 1.94  | 0.68  | 1.735  |
| D2 | IFIH1    | 6041:45360_CL586Contig1:r | 0.34  | 2.30  | 1.44  | 2.44  | 1.59  | 2.05  | 2.43  | 0.72  | 1.664  |
| D2 | CXCL10   | 11504:20822_CL1Contig1:f  | 0.11  | 2.75  | 1.05  | 3.40  | 1.19  | 1.68  | 2.52  | 0.47  | 1.646  |
| D2 | HERC5    | 10615:35840_CL7Contig1:r  | 0.33  | 2.87  | 1.26  | 2.36  | 1.33  | 1.91  | 2.08  | 0.76  | 1.612  |
| D2 | ISG20    | NM_001005351.2            | 0.34  | 2.52  | 1.46  | 2.12  | 1.42  | 2.57  | 1.66  | 0.67  | 1.595  |
| D2 | OAS1     | 35129:6613_CL1Contig2:r   | 0.21  | 2.48  | 1.36  | 2.20  | 1.28  | 1.78  | 1.84  | 0.47  | 1.452  |
| D2 | XAF1     | 5248:36876_CL1Contig2:r   | 0.18  | 1.78  | 1.12  | 2.38  | 0.93  | 1.70  | 1.44  | 0.37  | 1.238  |
| D2 | HERC6    | 10616:35840_CL8Contig1:r  | 0.38  | 1.70  | 0.59  | 1.60  | 1.10  | 1.38  | 1.87  | 0.48  | 1.138  |
| D2 | GBP2     | 18272:28721_CL3Contig1:f  | 0.28  | 0.93  | 0.79  | 1.19  | 1.12  | 1.78  | 1.96  | 0.31  | 1.045  |
| D2 | FCGR1A   | 9778:5621_CL2Contig2:f    | 0.15  | 1.67  | 1.44  | 1.52  | 0.79  | 1.16  | 0.90  | 0.50  | 1.016  |
| D2 | NRG1     | 34465:6810_CL1Contig1:f   | 0.15  | 1.58  | 0.88  | 1.53  | 0.71  | 1.46  | 1.17  | 0.22  | 0.963  |
| D2 | UBE2L6   | 2914:3285_CL2Contig1:f    | 0.14  | 1.59  | 0.66  | 2.37  | 0.74  | 0.84  | 0.99  | 0.31  | 0.954  |
| D2 | CASP1    | 2787:12475_CL1Contig1:r   | -0.28 | 1.73  | 0.93  | 1.53  | 0.84  | 1.40  | 1.23  | -0.06 | 0.915  |
| D2 | NT5C3    | 10635:8497_CL2Contig1:f   | 0.53  | 0.42  | -0.36 | 1.45  | 1.88  | 1.20  | 1.79  | 0.37  | 0.910  |
| D2 | CCL8     | 16011:7770_CL2Contig1:r   | 0.15  | 2.18  | 0.58  | 1.32  | 0.39  | 0.93  | 0.79  | 0.27  | 0.826  |
| D2 | HK3      | 19012:1489_CL2Contig1:f   | 0.23  | 1.30  | 1.37  | 0.86  | 0.86  | 0.93  | 0.96  | -0.11 | 0.800  |
| D2 | SLPI     | 34082:45360_49413351:f    | 0.09  | 0.86  | 0.43  | 0.99  | 0.26  | 1.75  | 1.41  | 0.58  | 0.797  |
| D2 | SLC25A28 | 8246:7076_CL2Contig2:r    | 0.12  | 0.82  | 1.14  | 1.07  | 1.30  | 0.78  | 1.03  | 0.11  | 0.796  |
| D2 | STAT2    | 11310:15518_CL4Contig1:f  | 0.15  | 1.27  | 0.57  | 1.16  | 0.60  | 1.18  | 1.23  | 0.10  | 0.783  |
| D2 | PARP9    | 531:2579_CL1Contig1:r     | 0.25  | 0.99  | 0.68  | 0.86  | 0.59  | 1.15  | 1.05  | 0.62  | 0.774  |
| D2 | NMI      | 5976:15972_CL1Contig1:r   | 0.21  | 0.29  | 0.62  | 0.84  | 0.95  | 1.08  | 1.79  | 0.19  | 0.746  |
| D2 | USP18    | 15714:14279_CL1Contig1:r  | -0.03 | 1.32  | 0.86  | 1.23  | 0.53  | 0.98  | 0.97  | 0.03  | 0.736  |
| D2 | PTPRC    | 14197:22429_CL1Contig1:f  | 0.28  | 0.40  | 1.09  | 0.74  | 1.37  | 0.02  | 1.44  | 0.37  | 0.714  |
| D2 | AIFM1    | 10133:45259_CL1Contig1:r  | 0.29  | 1.07  | 0.97  | 0.46  | 0.49  | 0.66  | 1.22  | 0.50  | 0.708  |
| D2 | DHRS3    | 3623:13909_CL1Contig1:r   | 0.10  | 0.67  | 0.72  | 0.93  | 0.53  | 0.89  | 1.29  | 0.50  | 0.704  |
| D2 | CASP4    | 2786:12475_CL2Contig1:r   | 0.19  | 0.84  | 0.72  | 0.89  | 0.26  | 1.11  | 1.22  | 0.40  | 0.704  |
| D2 | NAGK     | 1587:9230_CL1Contig2:f    | 0.28  | 1.48  | 1.16  | 1.14  | 0.44  | 0.38  | 0.34  | 0.27  | 0.686  |
| D2 | DNAJA1   | 11334:7676_CL1Contig3:r   | 0.01  | 0.96  | 0.42  | 0.78  | 0.61  | 0.96  | 1.51  | 0.11  | 0.670  |
| D2 | KLRF1    | 33260:45360_51353975:r    | 0.05  | 0.63  | 0.66  | 0.42  | 0.63  | 1.02  | 1.95  | -0.02 | 0.668  |
| D2 | CLEC4E   | 478:45360_CL514Contig1:r  | -0.10 | 0.08  | 1.04  | 0.71  | 1.09  | 1.32  | 1.13  | -0.07 | 0.650  |
| D2 | PPA1     | 8677:421_CL1Contig1:f     | 0.18  | 0.45  | 0.66  | 0.60  | 0.99  | 1.12  | 0.81  | 0.28  | 0.636  |
| D2 | RHBDL1   | 19837:2976_CL1Contig1:r   | 0.16  | 1.17  | 0.82  | 0.84  | 0.36  | 0.51  | 0.87  | 0.27  | 0.624  |
| D2 | KYNU     | 31503:12219_CL1Contig1:f  | -0.08 | 0.78  | 0.30  | 0.60  | 0.84  | 1.24  | 1.31  | -0.12 | 0.609  |
| D2 | CLEC12A  | 10820:13877_40430145:r    | 0.18  | 0.52  | 0.18  | 1.55  | 1.03  | 0.51  | 0.55  | 0.33  | 0.606  |
| D2 | LAMP1    | NM_001011507.1            | 0.29  | 0.73  | 0.77  | 1.16  | 0.64  | 0.31  | 0.50  | 0.39  | 0.599  |
| D2 | LGALS3BP | 4877:7567_CL1Contig1:r    | 0.08  | 1.24  | 0.74  | 0.93  | 0.15  | 1.12  | 0.24  | 0.25  | 0.594  |
| D2 | GVIN1    | 30427:8351_CL3Contig1:f   | 0.31  | 0.85  | 0.05  | 0.42  | 0.77  | 0.63  | 1.19  | 0.27  | 0.561  |
| D2 | BID      | 10964:30404_CL1Contig2:r  | 0.24  | 1.09  | 0.69  | 0.78  | 0.36  | 0.59  | 0.50  | 0.24  | 0.561  |
| D2 | CCRL2    | 33938:16197_29279993:r    | 0.20  | 0.95  | 0.85  | 0.71  | 0.54  | 0.41  | 0.64  | 0.16  | 0.558  |
| D2 | TAP1     | 7079:45360_CL293Contig1:f | 0.09  | 0.85  | 0.79  | 0.85  | 0.36  | 0.81  | 0.53  | 0.07  | 0.544  |
| D2 | PTPRM    | 1715:927_14657773:f       | 0.43  | 0.57  | 0.27  | 0.82  | 0.52  | 0.38  | 0.67  | 0.67  | 0.541  |
| D2 | TCF15    | 14592:4095_CL1Contig1:f   | 0.51  | 0.61  | 0.22  | 0.50  | 0.49  | 0.79  | 0.35  | 0.84  | 0.538  |
| D2 | GGH      | 13656:5720_CL1Contig1:f   | 0.26  | 1.06  | 0.34  | 0.88  | 0.54  | 0.20  | 0.60  | 0.37  | 0.530  |
| D2 | IRF7     | 8940:6822_CL1Contig1:f    | 0.11  | 1.07  | 0.85  | 0.88  | 0.43  | 0.39  | 0.61  | -0.09 | 0.530  |

|    |           |                            |       |      |       |       |      |       |       |       |       |
|----|-----------|----------------------------|-------|------|-------|-------|------|-------|-------|-------|-------|
| D2 | IGHA1     | 32774:15889_CL1Contig100:f | 0.09  | 0.79 | 0.86  | 0.85  | 0.38 | 0.53  | 0.50  | 0.11  | 0.513 |
| D2 | LAMP2     | 17879:1544_CL1Contig1:r    | 0.22  | 0.57 | 0.59  | 0.77  | 0.91 | 0.75  | 0.02  | 0.27  | 0.513 |
| D2 | PSMB8     | NM_213935.1                | 0.00  | 0.88 | 0.43  | 0.74  | 0.50 | 0.43  | 1.14  | -0.03 | 0.511 |
| D2 | PSMA5     | 9848:12850_CL1Contig1:r    | -0.09 | 0.67 | 0.48  | 0.38  | 0.40 | 0.81  | 1.26  | 0.04  | 0.494 |
| D2 | IGHE      | 17231:17000_2149935:f      | -0.06 | 0.63 | 0.52  | 0.93  | 0.59 | 0.37  | 0.73  | 0.04  | 0.470 |
| D2 | HIST1H2BM | 7337:795_CL1Contig5:f      | 0.13  | 0.52 | 0.48  | 0.61  | 0.25 | 0.98  | 0.82  | -0.06 | 0.466 |
| D2 | TRIM38    | 7353:45360_CL198Contig1:f  | 0.30  | 0.59 | 0.94  | 0.77  | 0.52 | 0.13  | 0.06  | 0.41  | 0.464 |
| D2 | FCN2      | NM_214160.1                | -0.10 | 0.67 | 0.73  | 0.70  | 0.53 | 0.55  | 0.78  | -0.21 | 0.456 |
| D2 | UPF2      | 17816:40706_CL4Contig1:r   | 0.13  | 0.81 | 0.18  | 0.73  | 0.46 | 0.26  | 0.84  | 0.22  | 0.454 |
| D2 | DDX21     | 8651:9908_CL5Contig1:f     | 0.59  | 0.42 | 0.10  | 0.40  | 0.79 | 0.66  | -0.16 | 0.80  | 0.450 |
| D2 | TCIRG1    | 8854:2312_CL1Contig1:f     | -0.04 | 0.49 | 0.89  | 0.66  | 0.38 | 0.46  | 0.61  | 0.09  | 0.443 |
| D2 | TDRD7     | 12815:2278_CL1Contig1:f    | 0.08  | 1.06 | 0.37  | 0.75  | 0.14 | 0.39  | 0.50  | 0.20  | 0.436 |
| D2 | YTHDC1    | 34503:4191_12008868:r      | 0.18  | 0.24 | 0.57  | 0.67  | 1.00 | 0.67  | -0.19 | 0.32  | 0.433 |
| D2 | CA2       | 2584:32_CL4Contig1:f       | 0.35  | 0.46 | 0.19  | 0.64  | 0.74 | 0.14  | 0.50  | 0.37  | 0.423 |
| D2 | DID01     | 31647:6365_45845961:r      | 0.61  | 0.61 | 0.30  | 0.03  | 0.59 | 0.49  | 0.04  | 0.64  | 0.413 |
| D2 | MOV10     | 9861:11234_CL1Contig1:f    | 0.27  | 0.46 | 0.06  | 0.75  | 0.57 | 0.24  | 0.64  | 0.29  | 0.410 |
| D2 | ?         | 105:7681_6987102-A:f       | 0.31  | 0.24 | 0.56  | 0.38  | 0.22 | 0.61  | 0.52  | 0.44  | 0.410 |
| D2 | PPAPDC2   | 12698:9361_CL1Contig1:r    | 0.65  | 0.34 | 0.28  | -0.07 | 0.36 | 0.71  | 0.27  | 0.67  | 0.401 |
| D2 | IFI6      | 6641:21023_CL1Contig1:r    | 0.23  | 0.71 | 0.82  | 0.56  | 0.13 | 0.20  | 0.24  | 0.32  | 0.401 |
| D2 | DHRS9     | 16461:7936_CL27Contig1:f   | 0.18  | 0.84 | 0.20  | 0.71  | 0.50 | 0.18  | 0.25  | 0.31  | 0.397 |
| D2 | HSP90AB1  | 7216:6424_CL1Contig1:f     | 0.37  | 0.28 | 0.28  | 1.02  | 0.64 | 0.07  | 0.11  | 0.33  | 0.388 |
| D2 | SST       | 95:7669_CL1Contig1:f       | 0.51  | 0.50 | 0.24  | 0.18  | 0.56 | 0.45  | 0.00  | 0.64  | 0.384 |
| D2 | ?         | 15587:18889_37854778:r     | 0.61  | 0.38 | 0.18  | 0.07  | 0.54 | 0.44  | -0.05 | 0.89  | 0.382 |
| D2 | GP2       | 16929:3887_CL1Contig1:f    | 0.63  | 0.38 | 0.28  | 0.01  | 0.42 | 0.73  | -0.09 | 0.69  | 0.381 |
| D2 | CTSZ      | 2067:4082_CL1Contig1:f     | 0.18  | 0.46 | 0.70  | 0.75  | 0.57 | 0.33  | -0.13 | 0.19  | 0.381 |
| D2 | PRKDC     | 34305:27767_8275029:f      | 0.67  | 0.45 | 0.41  | 0.06  | 0.64 | 0.21  | -0.02 | 0.61  | 0.379 |
| D2 | ?         | 34546:45360_40406079:f     | -0.10 | 0.54 | 0.18  | 0.49  | 0.67 | 0.66  | 0.53  | 0.01  | 0.373 |
| D2 | KLHL5     | 31292:5715_49324609:f      | 0.33  | 0.52 | 0.10  | 0.42  | 0.15 | 0.51  | 0.20  | 0.72  | 0.369 |
| D2 | USP25     | 16488:863_CL1Contig2:r     | -0.03 | 0.84 | 0.32  | 0.49  | 0.14 | 0.42  | 0.58  | 0.14  | 0.363 |
| D2 | ANG       | 942:12701_CL3Contig1:r     | 0.34  | 0.39 | -0.13 | 0.40  | 0.11 | 0.67  | 0.52  | 0.57  | 0.359 |
| D2 | FCN1      | 1528:45360_CL38Contig2:r   | 0.16  | 0.50 | 0.79  | 0.20  | 0.13 | 0.28  | 0.73  | 0.08  | 0.358 |
| D2 | NCF2      | 3278:8445_CL1Contig1:f     | 0.39  | 0.24 | 0.28  | 0.14  | 0.49 | 0.52  | 0.50  | 0.29  | 0.356 |
| D2 | IGKC      | 33739:15889_CL6Contig6:f   | 0.11  | 0.45 | 0.24  | 0.71  | 0.47 | 0.44  | 0.09  | 0.22  | 0.342 |
| D2 | OPTN      | 13759:11780_CL1Contig1:r   | 0.20  | 0.15 | 0.33  | 0.28  | 0.42 | 0.73  | 0.30  | 0.17  | 0.323 |
| D2 | CYB5B     | 4399:7124_CL3Contig1:r     | 0.52  | 0.35 | 0.26  | 0.21  | 0.52 | 0.37  | -0.08 | 0.43  | 0.322 |
| D2 | EMG1      | 18945:13931_CL1Contig1:f   | 0.17  | 0.32 | 0.46  | 0.39  | 0.24 | 0.30  | 0.59  | 0.09  | 0.320 |
| D2 | SLC35D1   | 13520:4395_40427761:f      | 0.48  | 0.27 | 0.24  | 0.35  | 0.07 | 0.26  | 0.25  | 0.64  | 0.320 |
| D2 | AP2S1     | 4148:8745_CL1Contig1:r     | 0.29  | 0.46 | 0.38  | 0.43  | 0.06 | 0.16  | 0.09  | 0.66  | 0.316 |
| D2 | PFDN6     | 19735:7552_CL1Contig1:r    | 0.19  | 0.40 | 0.41  | 0.50  | 0.21 | -0.09 | 0.38  | 0.46  | 0.308 |
| D2 | IGF2      | 8905:6608_CL1Contig1:r     | 0.29  | 0.23 | 0.08  | 0.39  | 0.32 | 0.66  | -0.03 | 0.49  | 0.303 |
| D2 | TSSC1     | 16909:18885_CL1Contig1:r   | 0.46  | 0.30 | 0.22  | 0.33  | 0.04 | 0.16  | 0.23  | 0.69  | 0.303 |
| D2 | CFLAR     | 16700:38522_CL1Contig2:r   | 0.37  | 0.17 | 0.18  | 0.33  | 0.54 | 0.13  | 0.37  | 0.32  | 0.301 |
| D2 | CCND2     | 10888:6162_CL2Contig1:r    | 0.16  | 0.45 | 0.63  | 0.26  | 0.11 | 0.46  | 0.12  | 0.10  | 0.285 |
| D2 | ?         | 9096:16108_CL1Contig2:r    | 0.29  | 0.25 | 0.18  | 0.11  | 0.23 | 0.42  | 0.58  | 0.15  | 0.277 |
| D2 | H2AFJ     | 9321:45360_CL432Contig1:f  | 0.24  | 0.22 | 0.33  | 0.39  | 0.11 | 0.11  | 0.30  | 0.47  | 0.271 |
| D2 | SFRS9     | 3857:620_CL1Contig1:r      | 0.32  | 0.24 | 0.23  | 0.40  | 0.03 | 0.05  | 0.26  | 0.62  | 0.269 |
| D2 | ID11      | 2486:7000_CL1Contig2:r     | 0.19  | 0.32 | -0.07 | 0.49  | 0.28 | 0.39  | 0.18  | 0.34  | 0.265 |
| D2 | FAF2      | 12393:5299_CL1Contig2:f    | 0.29  | 0.36 | -0.02 | 0.36  | 0.14 | 0.42  | 0.09  | 0.40  | 0.254 |
| D2 | FES       | 19663:34974_CL22Contig1:f  | 0.04  | 0.26 | 0.55  | 0.18  | 0.18 | 0.35  | 0.29  | 0.12  | 0.246 |
| D2 | UBE2V1    | 2303:40273_CL3Contig1:f    | 0.03  | 0.24 | 0.09  | 0.38  | 0.26 | 0.37  | 0.26  | 0.34  | 0.246 |

|    |         |                            |       |       |       |       |       |       |       |       |        |
|----|---------|----------------------------|-------|-------|-------|-------|-------|-------|-------|-------|--------|
| D2 | IPO4    | 857:15522_CL1Contig4:f     | 0.21  | 0.36  | 0.42  | 0.14  | 0.17  | 0.43  | -0.01 | 0.23  | 0.243  |
| D2 | PDE4A   | 12139:2625_CL3Contig1:r    | 0.39  | 0.36  | 0.31  | 0.14  | 0.19  | 0.33  | 0.03  | 0.16  | 0.237  |
| D2 | CGI-140 | 12076:7161_CL1Contig1:f    | 0.28  | 0.08  | 0.27  | 0.22  | 0.07  | 0.15  | 0.38  | 0.31  | 0.220  |
| D2 | SH3GL1  | 12240:183_CL1Contig2:f     | 0.28  | 0.38  | 0.13  | 0.24  | 0.04  | 0.20  | 0.08  | 0.39  | 0.216  |
| D2 | PILRA   | 8059:10630_CL1Contig2:f    | 0.23  | 0.32  | 0.23  | 0.21  | 0.29  | 0.34  | 0.00  | 0.11  | 0.216  |
| D2 | TMED4   | 10258:4658_CL1Contig4:r    | 0.19  | 0.22  | 0.12  | 0.26  | 0.21  | 0.30  | 0.21  | 0.22  | 0.215  |
| D2 | STARD5  | 6493:41734_CL1Contig1:r    | 0.34  | 0.28  | 0.26  | 0.28  | 0.17  | 0.15  | 0.01  | 0.24  | 0.215  |
| D2 | ?       | 8761:32575_CL10Contig1:r   | 0.25  | -0.03 | 0.15  | 0.33  | 0.31  | 0.30  | 0.12  | 0.28  | 0.213  |
| D2 | CD68    | 5093:18777_8275319:r       | 0.11  | 0.36  | 0.06  | 0.17  | 0.27  | 0.26  | 0.20  | 0.25  | 0.210  |
| D2 | ?       | 16411:27858_CL1Contig2:f   | 0.22  | 0.28  | 0.25  | 0.17  | 0.25  | 0.35  | 0.13  | 0.03  | 0.209  |
| D2 | ROBLD3  | 9635:37619_CL1Contig1:r    | 0.24  | 0.06  | 0.04  | 0.20  | 0.22  | 0.19  | 0.40  | 0.24  | 0.198  |
| D2 | YIPF4   | 1388:15140_CL1Contig1:f    | 0.24  | 0.26  | 0.24  | 0.26  | 0.11  | -0.02 | 0.26  | 0.19  | 0.191  |
| D2 | NAGLU   | 5539:9811_CL1Contig1:f     | 0.14  | 0.18  | 0.10  | 0.20  | 0.25  | 0.24  | 0.27  | 0.13  | 0.188  |
| D2 | HBA2    | 7997:93_CL1Contig2:r       | 0.49  | -0.91 | -1.49 | 1.17  | 0.27  | -0.82 | -0.59 | 0.50  | -0.173 |
| D2 | ACP1    | 16572:9139_CL1Contig1:r    | -0.40 | -0.22 | -0.33 | -0.25 | -0.08 | -0.33 | -0.18 | -0.41 | -0.275 |
| D2 | KLHDC2  | 17402:17797_CL1Contig1:r   | -0.44 | -0.36 | -0.44 | -0.33 | -0.15 | -0.31 | -0.03 | -0.40 | -0.308 |
| D2 | ?       | TC222889:f                 | -0.44 | -0.08 | -0.26 | -0.60 | -0.24 | -0.50 | -0.18 | -0.38 | -0.335 |
| D2 | ACTG1   | 30506:45360_CL1Contig23:f  | -0.57 | -0.29 | -0.31 | -0.25 | -0.25 | -0.14 | -0.73 | -0.39 | -0.365 |
| D2 | HSD17B3 | 15834:1933_CL1Contig1:r    | -0.30 | -0.70 | -0.51 | -0.53 | -0.15 | -0.20 | -0.76 | -0.26 | -0.425 |
| D2 | PSMB1   | 18421:11264_CL1Contig1:f   | -0.38 | -0.66 | -0.40 | -0.30 | -0.46 | -0.26 | -0.55 | -0.46 | -0.434 |
| D2 | KLRD1   | 33849:45360_CL788Contig1:r | -0.22 | -0.81 | -0.66 | -1.38 | -1.12 | -0.70 | -0.29 | -0.21 | -0.674 |
| D2 | STARD8  | 14276:5473_CL2Contig1:f    | -0.32 | -1.39 | -0.96 | -0.77 | -0.26 | -0.20 | -1.37 | -0.39 | -0.707 |
| D2 | ?       | TC234527:f                 | -0.39 | -1.08 | -1.35 | -1.71 | -1.07 | -1.19 | -0.44 | -0.37 | -0.950 |
| D2 | KLRK1   | 30875:45360_CL723Contig1:f | -0.21 | -2.12 | -1.08 | -1.94 | -2.01 | -0.97 | -0.67 | -0.36 | -1.170 |
| D3 | CXCL10  | 11504:20822_CL1Contig1:f   | 1.46  | 1.68  | 0.53  | 2.59  | 2.10  | 1.80  | 2.25  | 3.12  | 1.941  |
| D3 | IFIT3   | 19897:4950_CL3Contig1:f    | 1.27  | 1.66  | 0.47  | 1.74  | 1.75  | 1.49  | 2.30  | 3.44  | 1.765  |
| D3 | IFIH1   | 6041:45360_CL586Contig1:r  | 0.61  | 1.57  | 0.22  | 1.89  | 1.24  | 1.80  | 2.29  | 2.49  | 1.513  |
| D3 | OAS1    | 30554:6613_CL1Contig1:r    | 1.69  | 1.36  | 0.89  | 0.98  | 1.74  | 1.41  | 0.82  | 3.19  | 1.510  |
| D3 | ISG20   | NM_001005351.2             | 1.53  | 1.32  | 0.80  | 1.29  | 2.49  | 0.52  | 1.49  | 2.63  | 1.509  |
| D3 | XAF1    | 5248:36876_CL1Contig2:r    | 1.12  | 1.36  | 0.77  | 1.04  | 1.52  | 1.49  | 1.36  | 3.11  | 1.472  |
| D3 | EPSTI1  | 1866:18535_CL1Contig1:f    | 0.85  | 1.48  | 0.21  | 1.52  | 1.21  | 1.80  | 1.89  | 2.35  | 1.413  |
| D3 | HERC5   | 10615:35840_CL7Contig1:r   | 0.93  | 1.51  | 0.23  | 1.47  | 1.40  | 2.00  | 1.60  | 1.90  | 1.380  |
| D3 | IFIT1   | 8190:4950_CL1Contig1:f     | 2.24  | 0.40  | 0.91  | 0.55  | 1.40  | 1.40  | 0.14  | 2.20  | 1.154  |
| D3 | FCGR1A  | 9778:5621_CL2Contig2:f     | 0.72  | 0.76  | 0.08  | 1.33  | 1.23  | 1.14  | 1.35  | 2.58  | 1.149  |
| D3 | CLEC12A | 10820:13877_40430145:r     | 0.21  | 1.28  | -0.12 | 1.51  | 0.63  | 0.61  | 1.82  | 1.39  | 0.916  |
| D3 | SLPI    | 34082:45360_49413351:f     | 0.80  | 0.78  | 0.17  | 0.92  | 0.40  | 1.57  | 0.73  | 1.85  | 0.903  |
| D3 | NRG1    | 34465:6810_CL1Contig1:f    | 0.52  | 0.47  | -0.01 | 0.96  | 1.20  | 1.27  | 0.79  | 2.00  | 0.900  |
| D3 | HERC6   | 10616:35840_CL8Contig1:r   | 0.42  | 1.03  | 0.28  | 1.48  | 0.70  | 0.89  | 1.06  | 0.82  | 0.835  |
| D3 | NT5C3   | 10635:8497_CL2Contig1:f    | 0.48  | 1.12  | 0.13  | 1.45  | 0.08  | 1.12  | 1.78  | 0.24  | 0.800  |
| D3 | DHRS3   | 3623:13909_CL1Contig1:r    | 0.63  | 0.46  | 0.10  | 0.69  | 0.71  | 0.91  | 0.79  | 1.98  | 0.784  |
| D3 | RHBDL1  | 19837:2976_CL1Contig1:r    | 0.59  | 0.38  | 0.31  | 0.69  | 0.65  | 1.03  | 0.62  | 1.96  | 0.778  |
| D3 | GBP2    | 18272:28721_CL3Contig1:f   | 0.34  | 0.97  | -0.18 | 1.15  | 0.19  | 1.11  | 1.30  | 1.07  | 0.744  |
| D3 | CCRL2   | 33938:16197_29279993:r     | 0.54  | 0.74  | 0.33  | 0.61  | 0.85  | 0.78  | 0.70  | 1.25  | 0.725  |
| D3 | KLRF1   | 33260:45360_51353975:r     | 0.33  | 0.65  | -0.21 | 0.74  | 0.74  | 1.00  | 1.29  | 0.96  | 0.688  |
| D3 | CASP1   | 2787:12475_CL1Contig1:r    | 0.33  | 0.27  | -0.12 | 0.99  | 0.62  | 0.61  | 0.97  | 1.75  | 0.678  |
| D3 | NMI     | 5976:15972_CL1Contig1:r    | 0.26  | 0.90  | -0.21 | 0.54  | 0.36  | 1.88  | 0.43  | 0.93  | 0.637  |
| D3 | HSPA8   | 3086:24927_CL1Contig2:f    | 0.27  | 0.37  | 0.10  | 0.64  | 0.69  | 0.57  | 0.99  | 1.17  | 0.600  |
| D3 | STAT2   | 11310:15518_CL4Contig1:f   | 0.24  | 0.66  | 0.09  | 0.70  | 0.37  | 0.68  | 1.03  | 0.89  | 0.582  |
| D3 | CCL8    | 16011:7770_CL2Contig1:r    | 0.48  | 0.74  | 0.21  | 0.82  | 0.80  | 0.46  | 0.17  | 0.90  | 0.573  |
| D3 | PPA1    | 8677:421_CL1Contig1:f      | 0.23  | 0.61  | 0.00  | 0.88  | 0.30  | 0.84  | 1.06  | 0.66  | 0.573  |

|    |          |                              |       |       |       |       |       |       |       |       |        |
|----|----------|------------------------------|-------|-------|-------|-------|-------|-------|-------|-------|--------|
| D3 | UBD      | 17129:32384_CL0007748o16-3:r | 1.10  | 0.62  | -0.02 | 0.47  | 0.13  | 0.67  | 0.15  | 1.39  | 0.563  |
| D3 | LGALS3BP | 4877:7567_CL1Contig1:r       | 0.69  | 0.38  | 0.20  | 0.21  | 1.18  | 0.37  | 0.43  | 0.99  | 0.556  |
| D3 | PARP9    | 531:2579_CL1Contig1:r        | 0.47  | 0.42  | 0.40  | 0.44  | 0.55  | 0.74  | 0.79  | 0.57  | 0.548  |
| D3 | GBP1     | 13822:28721_CL1Contig2:r     | 0.19  | 1.31  | -0.01 | 0.76  | 0.03  | 0.60  | 1.06  | 0.42  | 0.545  |
| D3 | PHF11    | 17473:736_CL1Contig1:r       | 0.06  | 0.69  | -0.06 | 0.75  | 0.66  | 0.69  | 0.77  | 0.66  | 0.528  |
| D3 | DHX32    | 8401:29708_CL2Contig1:r      | 0.14  | 0.19  | 0.08  | 0.66  | 0.74  | 0.75  | 0.93  | 0.49  | 0.498  |
| D3 | IFI6     | 6641:21023_CL1Contig1:r      | 0.52  | 0.45  | 0.28  | 0.27  | 0.76  | 0.23  | 0.39  | 0.92  | 0.478  |
| D3 | ?        | 5853:563_CL1Contig4-B:f      | 0.13  | 0.38  | 0.18  | 0.91  | 0.38  | 0.41  | 1.05  | 0.37  | 0.476  |
| D3 | ?        | 9096:16108_CL1Contig2:r      | 0.05  | 0.85  | 0.28  | 0.36  | 0.42  | 0.46  | 0.40  | 0.59  | 0.427  |
| D3 | HSH2D    | 11991:15444_CL1Contig1:r     | 0.21  | 0.38  | 0.13  | 0.65  | 0.33  | 0.56  | 0.49  | 0.63  | 0.423  |
| D3 | GABBR1   | 7329:32384_CL1Contig1:f      | 0.30  | 0.64  | -0.01 | 0.43  | 0.16  | 0.41  | 0.84  | 0.60  | 0.421  |
| D3 | GVIN1    | 30427:8351_CL3Contig1:f      | 0.08  | 0.80  | 0.11  | 0.54  | 0.16  | 0.37  | 0.70  | 0.43  | 0.399  |
| D3 | CLIC2    | 17015:20095_CL2Contig1:r     | 0.11  | 0.32  | 0.21  | 0.33  | 0.29  | 0.30  | 0.47  | 0.46  | 0.312  |
| D3 | UBE2V1   | 2303:40273_CL3Contig1:f      | 0.32  | 0.27  | 0.27  | 0.47  | 0.19  | 0.20  | 0.37  | 0.31  | 0.300  |
| D3 | SERBP1   | 12626:4853_CL1Contig3:f      | 0.44  | 0.66  | 0.17  | -0.41 | -0.18 | -0.50 | -0.07 | -0.64 | -0.065 |
| D3 | HLA-DQA1 | 33905:2024_CL1Contig2:f      | -0.20 | 0.10  | -0.15 | 0.24  | -0.56 | 0.24  | -0.17 | -0.19 | -0.086 |
| D3 | RPL7A    | 20270:44862_CL2Contig4:r     | -0.07 | -0.07 | 0.03  | -0.06 | -0.23 | -0.16 | -0.23 | -0.05 | -0.105 |
| D3 | PLP2     | 18920:6393_CL1Contig1:r      | -0.32 | -0.36 | -0.16 | -0.16 | -0.14 | -0.20 | -0.30 | -0.24 | -0.235 |
| D3 | NEDD1    | 11383:29158_CL1Contig1:r     | -0.29 | -0.30 | -0.21 | -0.15 | -0.29 | -0.21 | -0.26 | -0.23 | -0.243 |
| D3 | NDFIP1   | 11811:28041_CL1Contig1:f     | -0.22 | -0.26 | -0.24 | -0.07 | -0.32 | -0.37 | -0.26 | -0.27 | -0.251 |
| D3 | MDH1     | 1159:6981_CL1Contig2:r       | -0.16 | -0.17 | -0.19 | -0.25 | -0.40 | -0.35 | -0.26 | -0.31 | -0.261 |
| D3 | FH       | 30562:6664_12012711:r        | -0.34 | -0.44 | -0.26 | -0.10 | -0.24 | -0.15 | -0.13 | -0.46 | -0.265 |
| D3 | PLCB2    | 989:34663_CL3Contig1:r       | -0.23 | -0.34 | -0.14 | -0.25 | -0.33 | -0.32 | -0.29 | -0.23 | -0.266 |
| D3 | ASCC2    | TC222256:f                   | -0.26 | -0.47 | -0.23 | -0.27 | -0.22 | -0.21 | -0.34 | -0.14 | -0.268 |
| D3 | TUBB2A   | 19199:32245_CL1Contig1:f     | -0.18 | -0.33 | -0.31 | -0.31 | -0.25 | -0.15 | -0.49 | -0.13 | -0.269 |
| D3 | PTPN18   | 5951:4199_CL9Contig1:f       | -0.46 | -0.44 | -0.41 | -0.12 | -0.26 | -0.06 | -0.21 | -0.24 | -0.275 |
| D3 | FYN      | 13021:34974_CL4Contig1:r     | -0.31 | -0.36 | -0.19 | -0.18 | -0.23 | -0.12 | -0.20 | -0.62 | -0.276 |
| D3 | RPL4     | 3869:4038_CL1Contig1:f       | -0.16 | -0.19 | -0.17 | -0.32 | -0.58 | 0.03  | -0.59 | -0.26 | -0.280 |
| D3 | CCNI     | 11489:1825_CL1Contig1:f      | -0.20 | -0.16 | -0.20 | -0.20 | -0.44 | -0.42 | -0.52 | -0.14 | -0.284 |
| D3 | CTSH     | 6481:2503_CL3Contig1:f       | -0.29 | -0.41 | -0.17 | -0.27 | -0.02 | -0.44 | -0.39 | -0.29 | -0.285 |
| D3 | HMG1     | 15635:41937_CL1Contig1:r     | -0.28 | -0.31 | -0.32 | -0.04 | -0.26 | -0.64 | -0.24 | -0.21 | -0.288 |
| D3 | ?        | 33521:12989_CL1Contig1:r     | -0.37 | -0.22 | -0.35 | 0.07  | -0.29 | -0.60 | -0.33 | -0.29 | -0.297 |
| D3 | MRPL10   | 2307:12629_40481805:f        | -0.32 | -0.42 | -0.36 | -0.04 | -0.25 | -0.30 | -0.23 | -0.49 | -0.301 |
| D3 | ARRB2    | 13281:1924_CL1Contig1:f      | -0.13 | -0.31 | -0.12 | -0.22 | -0.27 | -0.34 | -0.40 | -0.66 | -0.306 |
| D3 | NDUFA1   | 13868:10166_CL1Contig1:f     | -0.25 | -0.68 | -0.35 | -0.44 | -0.32 | -0.17 | -0.20 | -0.04 | -0.306 |
| D3 | FAM43A   | TC224947:f                   | -0.19 | -0.47 | -0.11 | -0.53 | -0.23 | -0.45 | -0.27 | -0.20 | -0.306 |
| D3 | POLR1D   | 1947:9392_CL1Contig1:r       | -0.22 | -0.31 | -0.21 | -0.29 | -0.25 | -0.47 | -0.46 | -0.24 | -0.307 |
| D3 | TUBGCP2  | 19912:2441_CL1Contig1:r      | -0.17 | -0.41 | -0.18 | -0.20 | -0.30 | -0.40 | -0.49 | -0.31 | -0.308 |
| D3 | DUT      | 583:146_CL1Contig2:r         | -0.37 | -0.34 | -0.37 | -0.15 | -0.26 | -0.54 | -0.30 | -0.16 | -0.312 |
| D3 | CORO1A   | 7966:1963_CL1Contig1:r       | -0.17 | -0.23 | -0.18 | -0.43 | -0.26 | -0.57 | -0.67 | 0.00  | -0.314 |
| D3 | IL18     | 2976:6447_CL1Contig1:r       | -0.30 | -0.41 | -0.36 | -0.01 | -0.61 | -0.28 | -0.50 | -0.10 | -0.321 |
| D3 | SCAND1   | 2170:45360_CL156Contig1:f    | -0.36 | -0.42 | -0.29 | -0.23 | -0.41 | -0.12 | -0.31 | -0.43 | -0.321 |
| D3 | PRELID1  | 12345:18752_CL1Contig1:r     | -0.24 | -0.47 | -0.25 | -0.27 | -0.27 | -0.36 | -0.30 | -0.43 | -0.324 |
| D3 | ?        | 30496:28608_CL2Contig1:f     | -0.64 | -0.23 | -0.40 | -0.23 | -0.26 | 0.09  | -0.31 | -0.62 | -0.325 |
| D3 | TRIM28   | 4344:12045_CL1Contig3:f      | -0.39 | -0.50 | -0.32 | -0.20 | -0.29 | -0.61 | -0.34 | 0.03  | -0.327 |
| D3 | SFRS2    | 4936:45360_CL1Contig9:r      | -0.21 | -0.16 | -0.13 | -0.38 | -0.41 | -0.68 | -0.43 | -0.23 | -0.329 |
| D3 | ?        | 33693:33866_21550555:r       | -0.20 | -0.52 | -0.11 | -0.44 | -0.13 | -0.42 | -0.60 | -0.23 | -0.331 |
| D3 | LCK      | 5793:34974_CL2Contig1:r      | -0.10 | -0.29 | -0.31 | -0.21 | -0.55 | -0.46 | -0.36 | -0.39 | -0.334 |
| D3 | PCBD2    | 11771:7173_CL1Contig1:r      | -0.42 | -0.72 | -0.39 | 0.04  | -0.29 | -0.14 | -0.23 | -0.53 | -0.335 |
| D3 | HLA-DRB2 | 7270:10014_CL1Contig7:r      | -0.16 | -0.38 | -0.14 | -0.80 | -0.53 | -0.26 | -0.07 | -0.34 | -0.336 |

|    |          |                             |       |       |       |       |       |       |       |       |        |
|----|----------|-----------------------------|-------|-------|-------|-------|-------|-------|-------|-------|--------|
| D3 | FGL2     | 10543:45360_CL68Contig1:f   | -0.43 | -0.77 | -0.40 | -0.16 | -0.41 | -0.33 | -0.06 | -0.17 | -0.341 |
| D3 | GNG5     | 9234:7628_CL2Contig1:r      | -0.37 | -0.25 | -0.47 | -0.22 | -0.49 | -0.70 | -0.09 | -0.16 | -0.343 |
| D3 | COX7A2L  | 30805:1267_59826587:f       | -0.35 | -0.22 | -0.28 | -0.10 | -0.36 | -0.84 | -0.36 | -0.27 | -0.348 |
| D3 | EIF2S3   | 10056:8128_CL1Contig2:r     | -0.27 | -0.17 | -0.29 | -0.05 | -0.86 | -0.32 | -0.23 | -0.60 | -0.349 |
| D3 | MYC      | 2625:16729_CL1Contig1:f     | -0.16 | -0.31 | -0.16 | -0.61 | -0.57 | -0.35 | -0.39 | -0.26 | -0.351 |
| D3 | GNAS     | 14089:41223_CL1Contig5:f    | -0.03 | -0.40 | -0.20 | -0.25 | -0.49 | -0.62 | -0.53 | -0.30 | -0.353 |
| D3 | HMGB1    | 16846:45360_40429211:f      | -0.40 | -0.42 | -0.47 | -0.21 | -0.93 | -0.18 | -0.10 | -0.11 | -0.353 |
| D3 | ?        | TC206060:f                  | -0.40 | -0.09 | -0.39 | -0.21 | -0.93 | -0.17 | -0.14 | -0.49 | -0.353 |
| D3 | PSMA7    | 2060:12940_CL2Contig1:f     | -0.26 | -0.50 | -0.46 | -0.22 | -0.31 | -0.51 | -0.39 | -0.21 | -0.357 |
| D3 | THEM2    | 7364:17573_CL1Contig1:r     | -0.38 | -0.60 | -0.51 | -0.05 | -0.32 | -0.25 | -0.44 | -0.33 | -0.359 |
| D3 | ARPC5    | 16064:4911_CL2Contig1:r     | -0.34 | -0.24 | -0.32 | -0.10 | -0.45 | -0.76 | -0.36 | -0.31 | -0.360 |
| D3 | RPL3     | 34362:7936_40394286:f       | -0.33 | -0.19 | -0.06 | -0.44 | -0.08 | -0.33 | -0.97 | -0.50 | -0.362 |
| D3 | LPCAT3   | 20058:5817_CL1Contig1:r     | -0.29 | -0.53 | -0.25 | -0.23 | -0.16 | -0.68 | -0.47 | -0.31 | -0.364 |
| D3 | CST7     | 2467:13124_CL2Contig1:r     | -0.43 | -0.54 | -0.17 | -0.31 | -0.36 | -0.33 | -0.82 | 0.03  | -0.366 |
| D3 | IVNS1ABP | 34105:19113_CL2Contig1:f    | -0.67 | -0.24 | -0.55 | 0.01  | -0.70 | -0.04 | -0.13 | -0.63 | -0.369 |
| D3 | ACTG1    | 30506:45360_CL1Contig23:f   | -0.25 | -0.34 | -0.16 | -0.53 | -0.26 | -0.61 | -0.67 | -0.13 | -0.369 |
| D3 | C10      | 10852:3860_CL1Contig1:r     | -0.29 | -0.71 | -0.28 | -0.38 | -0.25 | -0.15 | -0.53 | -0.37 | -0.370 |
| D3 | HIGD2A   | 12390:15762_CL1Contig1:f    | -0.30 | -0.54 | -0.27 | -0.42 | -0.11 | -0.57 | -0.46 | -0.33 | -0.375 |
| D3 | CARD6    | 13939:23132_CL2Contig1:r    | -0.18 | -0.54 | -0.23 | -0.64 | -0.19 | -0.58 | -0.62 | -0.11 | -0.386 |
| D3 | PNPLA3   | 11052:10135_CL2Contig1:r    | -0.29 | -0.47 | -0.23 | -0.42 | -0.22 | -0.58 | -0.40 | -0.49 | -0.388 |
| D3 | HMGN3    | 34028:24443_CL1Contig1:r    | -0.36 | -0.21 | -0.34 | -0.37 | -0.70 | -0.38 | -0.27 | -0.47 | -0.388 |
| D3 | ZNF706   | 2768:1724_CL1Contig1:r      | -0.34 | -0.16 | -0.42 | -0.27 | -0.77 | -0.16 | -0.33 | -0.67 | -0.390 |
| D3 | POLR2L   | 14433:11495_CL1Contig1:r    | -0.31 | -0.56 | -0.20 | -0.42 | -0.22 | -0.62 | -0.54 | -0.27 | -0.393 |
| D3 | TRBC1    | 33998:15889_CL2Contig23:f   | -0.17 | -0.37 | -0.09 | -0.71 | -0.37 | -0.40 | -0.64 | -0.42 | -0.396 |
| D3 | MRPS17   | 7914:44685_CL3Contig2:f     | -0.43 | -0.73 | -0.30 | -0.42 | -0.38 | -0.33 | -0.56 | -0.04 | -0.399 |
| D3 | ?        | 35239:650_9019662:f         | -0.26 | -0.46 | -0.39 | -0.37 | -0.15 | -0.89 | -0.37 | -0.33 | -0.402 |
| D3 | SIPAL12  | 1313:3891_49352677:f        | -0.29 | -0.26 | -0.10 | -0.22 | -0.63 | -0.38 | -0.53 | -0.86 | -0.409 |
| D3 | S100A4   | 9663:10691_37985407:f       | -0.24 | -0.82 | -0.14 | -0.34 | -0.28 | -0.25 | -0.97 | -0.31 | -0.418 |
| D3 | CD69     | 10823:45360_C0007760d20-7:f | -0.29 | -0.57 | -0.33 | -0.40 | -0.77 | -0.50 | -0.46 | -0.06 | -0.423 |
| D3 | ?        | 12044:42948_CL1Contig1:f    | -0.19 | -0.54 | -0.19 | -0.82 | -0.45 | -0.52 | -0.37 | -0.43 | -0.439 |
| D3 | SLC25A6  | 10120:44685_CL1Contig1:r    | -0.24 | -0.70 | -0.08 | -0.59 | -0.36 | -0.48 | -0.79 | -0.34 | -0.448 |
| D3 | ?        | TC202688:f                  | -0.56 | -0.88 | -0.39 | -0.28 | -0.89 | 0.08  | -0.17 | -0.50 | -0.449 |
| D3 | CD74     | 11833:16274_CL1Contig2:r    | -0.24 | -0.47 | -0.22 | -0.50 | -0.39 | -0.67 | -0.73 | -0.46 | -0.460 |
| D3 | ECHS1    | 19915:32175_CL1Contig2:r    | -0.25 | -0.73 | -0.24 | -0.44 | -0.27 | -0.70 | -0.69 | -0.36 | -0.460 |
| D3 | CEBPD    | 17184:7423_CL1Contig3:f     | -0.36 | -0.97 | -0.28 | -0.45 | -0.27 | -0.76 | -0.52 | -0.16 | -0.471 |
| D3 | ITGB1BP2 | 9955:11958_CL2Contig1:r     | -0.48 | -0.47 | -0.58 | -0.16 | -0.60 | -0.19 | -0.47 | -0.84 | -0.474 |
| D3 | HLA-DQB1 | 33766:10014_CL1Contig9:f    | -0.46 | -0.52 | -0.32 | -0.44 | -0.45 | -0.38 | -0.56 | -0.74 | -0.484 |
| D3 | HCST     | 30959:21243_CL1Contig1:f    | -0.13 | -0.58 | -0.17 | -0.94 | -0.40 | -0.94 | -0.87 | 0.14  | -0.487 |
| D3 | SMC6     | 13663:8276_CL1Contig2:f     | -0.48 | -0.52 | -0.44 | -0.69 | -1.09 | -0.01 | -0.14 | -0.54 | -0.488 |
| D3 | IL20RB   | 288:11045_CL1Contig1:f      | -0.27 | -0.63 | -0.33 | -0.37 | -0.50 | -0.62 | -0.72 | -0.50 | -0.492 |
| D3 | KLRD1    | 33849:45360_CL788Contig1:r  | -0.47 | -0.89 | -0.40 | -0.28 | -0.86 | -0.09 | -0.66 | -0.31 | -0.495 |
| D3 | TMEM62   | 1011:15853_CL1Contig1:f     | -0.23 | -0.73 | -0.07 | -1.07 | -0.55 | -0.59 | -0.63 | -0.36 | -0.530 |
| D3 | KLF2     | 30975:39719_CL1Contig1:r    | -0.47 | -0.66 | -0.36 | -0.64 | -0.50 | -0.55 | -1.05 | -0.04 | -0.534 |
| D3 | CROP     | 14556:14925_CL1Contig3:r    | -0.55 | -1.00 | -0.42 | -0.54 | -1.01 | -0.60 | 0.53  | -0.77 | -0.545 |
| D3 | CCL23    | 32200:6563_CL1Contig1:f     | -0.51 | -1.09 | -0.20 | -0.72 | -0.34 | -0.80 | -0.80 | -0.04 | -0.563 |
| D3 | PDE4B    | 14679:2625_CL1Contig1:r     | -0.50 | -1.09 | -0.39 | -0.42 | -1.09 | -0.91 | -0.20 | -0.09 | -0.586 |
| D3 | VIM      | 2392:45360_CL5Contig6:f     | -0.32 | -0.52 | -0.37 | -0.37 | -0.74 | -0.68 | -0.67 | -1.07 | -0.592 |
| D3 | ?        | 17700:44684_CL1Contig1:f    | -0.48 | -0.79 | -0.50 | -1.13 | -0.43 | -0.77 | -0.21 | -0.59 | -0.612 |
| D3 | NDUFS2   | TC218189:f                  | -0.61 | -0.23 | -0.61 | -0.49 | -1.28 | -0.57 | -0.09 | -1.37 | -0.656 |
| D3 | NAP1L1   | 11331:2100_CL1Contig2:r     | -0.56 | -0.60 | -0.54 | -0.34 | -1.37 | -0.61 | -0.07 | -1.22 | -0.664 |

|    |       |                             |       |       |       |       |       |       |       |       |        |
|----|-------|-----------------------------|-------|-------|-------|-------|-------|-------|-------|-------|--------|
| D3 | CCL5  | 5041:117_CL4Contig1:r       | -0.73 | -1.44 | -0.43 | -0.97 | -0.35 | -1.19 | -1.12 | 0.66  | -0.696 |
| D3 | ?     | TC234527:f                  | -0.29 | -0.89 | -0.41 | -1.50 | -0.85 | -0.62 | -0.77 | -0.96 | -0.786 |
| D3 | KLRB1 | 18377:45360_CL1218Contig1:f | -0.28 | -1.02 | -0.32 | -1.90 | -1.28 | -0.84 | -1.25 | -0.27 | -0.895 |
| D3 | KLRK1 | 30875:45360_CL723Contig1:f  | -0.47 | -1.96 | -0.44 | -1.75 | -1.49 | -1.51 | -1.43 | -0.13 | -1.147 |
| D3 | CYTB  | TC205573:f                  | -0.92 | -1.57 | -0.65 | -1.30 | -1.45 | -1.39 | -2.03 | -1.67 | -1.373 |

Table S3. Genes which expression is modified during Eystrup infection compared to pigs infected by Paderborn. Two-class SAM analysis. Values are means of the log ratio for the eight pigs infected by Eystrup (E1-E8) or Paderborn (P1-P8) versus non infected pigs, DPI: Day Post Infection.

| DPI | Gene Name | Gene ID                   | Mean Log Ratio |           |
|-----|-----------|---------------------------|----------------|-----------|
|     |           |                           | Eystrup        | Paderborn |
| D1  | EPSTI1    | 1866:18535_CL1Contig1:f   | 1.712          | 0.271     |
| D1  | IFIT3     | 19897:4950_CL3Contig1:f   | 1.633          | 0.370     |
| D1  | IFIH1     | 6041:45360_CL586Contig1:r | 1.630          | 0.126     |
| D1  | HERC6     | 10616:35840_CL8Contig1:r  | 1.406          | 0.215     |
| D1  | GBP2      | 18272:28721_CL3Contig1:f  | 1.403          | 0.089     |
| D1  | GBP1      | 13822:28721_CL1Contig2:r  | 1.358          | 0.405     |
| D1  | ISG20     | NM_001005351.2            | 1.276          | 0.080     |
| D1  | IFI44     | 16784:18661_CL2Contig1:r  | 1.243          | 0.197     |
| D1  | ?         | TC225837:f                | 1.154          | 0.051     |
| D1  | OAS1      | 35129:6613_CL1Contig2:r   | 1.080          | 0.238     |
| D1  | XAF1      | 5248:36876_CL1Contig2:r   | 1.058          | 0.244     |
| D1  | STAT2     | 11310:15518_CL4Contig1:f  | 1.050          | 0.200     |
| D1  | GVIN1     | 30427:8351_CL3Contig1:f   | 1.033          | 0.256     |
| D1  | NT5C3     | 10635:8497_CL2Contig1:f   | 1.002          | 0.311     |
| D1  | CASP1     | 2787:12475_CL1Contig1:r   | 0.948          | 0.206     |
| D1  | FCGR1B    | 9778:5621_CL2Contig2:f    | 0.920          | 0.148     |
| D1  | PARP9     | 531:2579_CL1Contig1:r     | 0.907          | 0.274     |
| D1  | NMI       | 5976:15972_CL1Contig1:r   | 0.900          | -0.115    |
| D1  | NBN       | 2580:25557_CL1Contig1:f   | 0.896          | -0.048    |
| D1  | DNAJA1    | 11334:7676_CL1Contig3:r   | 0.885          | -0.013    |
| D1  | USP18     | 15714:14279_CL1Contig1:r  | 0.851          | 0.021     |
| D1  | PHF11     | 17473:736_CL1Contig1:r    | 0.837          | 0.236     |
| D1  | KYNU      | 31503:12219_CL1Contig1:f  | 0.828          | 0.001     |
| D1  | TRIM38    | 7353:45360_CL198Contig1:f | 0.828          | 0.030     |
| D1  | GGH       | 13656:5720_CL1Contig1:f   | 0.788          | 0.010     |
| D1  | HK3       | 19012:1489_CL2Contig1:f   | 0.755          | 0.257     |
| D1  | LAMP2     | 17879:1544_CL1Contig1:r   | 0.752          | 0.131     |
| D1  | CD47      | 457:18584_51304632:r      | 0.730          | -0.041    |
| D1  | CASP4     | 2786:12475_CL2Contig1:r   | 0.726          | -0.028    |
| D1  | CYBA      | TC205573:f                | 0.721          | -0.874    |
| D1  | FLJ20487  | 9096:16108_CL1Contig2:r   | 0.720          | 0.202     |
| D1  | KLRF1     | 33260:45360_51353975:r    | 0.709          | -0.293    |
| D1  | PSMA6     | 6559:7716_CL1Contig1:r    | 0.702          | -0.020    |
| D1  | PPA1      | 8677:421_CL1Contig1:f     | 0.674          | 0.145     |
| D1  | BLNK      | 8193:9956_CL1Contig1:r    | 0.673          | 0.070     |
| D1  | CCRL2     | 33938:16197_29279993:r    | 0.669          | 0.124     |
| D1  | PSMA5     | 9848:12850_CL1Contig1:r   | 0.666          | -0.008    |
| D1  | AIFM1     | 10133:45259_CL1Contig1:r  | 0.660          | 0.052     |
| D1  | RHBDL1    | 19837:2976_CL1Contig1:r   | 0.647          | 0.071     |
| D1  | HSH2D     | 11991:15444_CL1Contig1:r  | 0.645          | 0.116     |
| D1  | CNIH4     | 3402:15321_CL1Contig1:f   | 0.643          | -0.045    |
| D1  | ?         | TC226654:f                | 0.632          | 0.189     |
| D1  | ?         | TC202102:f                | 0.630          | -0.082    |
| D1  | ?         | TC208005:f                | 0.611          | -0.082    |
| D1  | CD55      | 14560:9903_CL1Contig2:f   | 0.598          | 0.128     |
| D1  | ?         | TC237585:r                | 0.588          | -0.225    |
| D1  | DHRS3     | 3623:13909_CL1Contig1:r   | 0.577          | 0.005     |
| D1  | ATG3      | 18012:13861_CL1Contig1:r  | 0.571          | 0.066     |
| D1  | IFI16     | 34125:3432_CL2Contig1:r   | 0.567          | 0.011     |
| D1  | DHX32     | 8401:29708_CL2Contig1:r   | 0.564          | -0.026    |
| D1  | MAP2K1IP1 | 11644:10903_CL1Contig1:r  | 0.563          | 0.025     |
| D1  | WWP1      | 2590:15066_CL9Contig1:f   | 0.554          | 0.010     |
| D1  | JAK2      | 14121:25073_CL5Contig1:f  | 0.553          | -0.018    |
| D1  | MRPL47    | 19071:3690_CL1Contig1:r   | 0.539          | -0.140    |
| D1  | HEXB      | 31291:9150_6853856:r      | 0.531          | -0.010    |
| D1  | C2orf12   | 13715:36977_CL1Contig1:r  | 0.510          | -0.166    |
| D1  | GNG11     | 15175:5047_CL1Contig1:f   | 0.506          | -0.314    |
| D1  | FBP1      | 17278:12319_CL1Contig1:r  | 0.504          | -0.163    |
| D1  | ?         | TC227367:f                | 0.504          | -0.002    |
| D1  | MRPL1     | 16190:11207_CL1Contig1:r  | 0.485          | -0.065    |
| D1  | C15orf48  | 16107:23139_CL1Contig1:r  | 0.485          | -0.065    |
| D1  | C7orf30   | 10510:14581_54512474:f    | 0.481          | -0.213    |
| D1  | IRF7      | 8940:6822_CL1Contig1:f    | 0.477          | 0.081     |
| D1  | BANK1     | 14866:18098_CL1Contig1:f  | 0.473          | -0.208    |
| D1  | TAP2      | 7077:45360_CL224Contig1:f | 0.470          | 0.008     |

|    |           |                             |       |        |
|----|-----------|-----------------------------|-------|--------|
| D1 | ?         | TC207758:f                  | 0.469 | -0.322 |
| D1 | ?         | TC224301:f                  | 0.459 | 0.075  |
| D1 | KIAA0368  | 12607:7684_CL1Contig1:r     | 0.459 | -0.058 |
| D1 | GLRX2     | 3369:28267_CL1Contig1:f     | 0.458 | -0.312 |
| D1 | TTF2      | 9813:7175_CL13Contig1:r     | 0.450 | 0.026  |
| D1 | Nat13     | 17327:16143_C0007741a12-7:f | 0.439 | 0.047  |
| D1 | EIF2S1    | 31121:7073_40425587:f       | 0.434 | 0.073  |
| D1 | PLAC8     | 17585:4705_54527068:f       | 0.426 | -0.020 |
| D1 | ?         | 17879:1544_CL1Contig2-B:r   | 0.426 | -0.021 |
| D1 | AIF1      | 19768:21656_CL1Contig2:f    | 0.425 | -0.084 |
| D1 | SLC15A3   | 9063:4969_CL1Contig1:r      | 0.424 | -0.043 |
| D1 | TDRD7     | 12815:2278_CL1Contig1:f     | 0.418 | 0.002  |
| D1 | Clorf160  | 5853:563_CL1Contig1:r       | 0.412 | -0.041 |
| D1 | NEDD4L    | 15280:15066_CL3Contig1:r    | 0.412 | -0.026 |
| D1 | PSMD14    | 14221:20614_CL1Contig1:r    | 0.388 | -0.060 |
| D1 | ACTL6A    | 15092:15211_CL1Contig1:f    | 0.381 | 0.023  |
| D1 | GMPS      | 224:11111_CL1Contig1:f      | 0.376 | -0.205 |
| D1 | SAP30L    | 18125:8055_CL1Contig2:r     | 0.373 | -0.273 |
| D1 | NCF2      | 3278:8445_CL1Contig1:f      | 0.359 | -0.107 |
| D1 | MED6      | 717:3349_CL1Contig1:r       | 0.356 | -0.049 |
| D1 | SKP1A     | 11756:13902_CL1Contig1:r    | 0.351 | -0.087 |
| D1 | NDUFA9    | 10902:7705_CL1Contig2:f     | 0.340 | -0.040 |
| D1 | BDKRB2    | 32732:1906_15034450:f       | 0.339 | 0.004  |
| D1 | TMEM168   | 10593:2077_CL1Contig1:f     | 0.338 | -0.045 |
| D1 | BRP44     | 15694:17980_CL1Contig1:r    | 0.336 | -0.398 |
| D1 | Cl2orf45  | 31958:16486_CL1Contig1:f    | 0.325 | -0.112 |
| D1 | SNRPD3    | 3772:13297_CL1Contig2:r     | 0.325 | -0.030 |
| D1 | NUDT9     | 11538:8863_CL1Contig2:f     | 0.323 | -0.231 |
| D1 | PSMA3     | 622:12850_CL2Contig2:f      | 0.318 | -0.055 |
| D1 | TRDMT1    | 33326:8337_CL1Contig1:r     | 0.306 | -0.163 |
| D1 | SKIV2L2   | 13410:30059_CL2Contig1:r    | 0.306 | -0.006 |
| D1 | ARL1      | 11411:3458_CL5Contig1:f     | 0.301 | -0.275 |
| D1 | DBF4      | 14287:1874_CL2Contig1:r     | 0.300 | -0.043 |
| D1 | TEAD3     | TC205153:f                  | 0.297 | -0.215 |
| D1 | TIFA      | 11598:3681_CL1Contig1:f     | 0.296 | -0.026 |
| D1 | UCHL3     | 2007:936_CL2Contig1:r       | 0.294 | -0.118 |
| D1 | HIST1H2BM | 7331:795_CL1Contig6:f       | 0.280 | -0.147 |
| D1 | TMEM126A  | 8946:1411_CL1Contig2:r      | 0.277 | -0.194 |
| D1 | WARS      | 6352:23915_CL1Contig2:r     | 0.276 | -0.001 |
| D1 | CPSF2     | 6611:3566_CL1Contig1:f      | 0.273 | -0.091 |
| D1 | NDUFB6    | 12579:16659_CL1Contig1:r    | 0.271 | -0.314 |
| D1 | SSBP1     | 2245:23746_CL1Contig1:f     | 0.261 | -0.239 |
| D1 | POLR2K    | 2775:19486_CL1Contig1:r     | 0.258 | -0.191 |
| D1 | LOC728350 | 32784:13007_CL1Contig2:r    | 0.255 | -0.274 |
| D1 | SURB7     | 18237:3722_CL1Contig1:r     | 0.254 | -0.234 |
| D1 | HBXIP     | 31131:21063_CL1Contig2:f    | 0.253 | -0.282 |
| D1 | PRCP      | 33069:17107_7843324:f       | 0.253 | -0.046 |
| D1 | ALG8      | 16046:5391_CL1Contig1:f     | 0.253 | 0.011  |
| D1 | PSMC2     | 10563:1272_CL6Contig2:f     | 0.241 | -0.214 |
| D1 | ?         | TC208051:f                  | 0.241 | -0.210 |
| D1 | ZNF618    | 32604:12358_CL2Contig1:r    | 0.234 | -0.048 |
| D1 | ?         | 2743:22334_CL1Contig1:f     | 0.229 | -0.117 |
| D1 | PTP4A2    | 11127:6394_CL1Contig1:f     | 0.215 | -0.154 |
| D1 | MRPL19    | 1709:10072_CL1Contig1:r     | 0.213 | -0.086 |
| D1 | PIN4      | 17648:9668_CL1Contig1:r     | 0.211 | -0.181 |
| D1 | AKR1A1    | 13515:1001_CL2Contig1:r     | 0.205 | -0.318 |
| D1 | PRDX4     | 10047:1766_CL4Contig1:r     | 0.201 | -0.228 |
| D1 | MRPL35    | 1778:10151_CL1Contig1:r     | 0.195 | -0.098 |
| D1 | RPS27L    | 1080:1292_CL2Contig1:r      | 0.184 | -0.221 |
| D1 | ING3      | 15899:2515_CL4Contig1:f     | 0.181 | -0.167 |
| D1 | ?         | TC223655:f                  | 0.180 | -0.175 |
| D1 | POMP      | 1931:4170_CL1Contig1:r      | 0.178 | -0.301 |
| D1 | C8orf59   | 33130:14032_CL1Contig1:f    | 0.174 | -0.364 |
| D1 | UBE2L3    | 3784:3285_CL1Contig1:r      | 0.165 | -0.205 |
| D1 | TCP1      | 12928:45900_14305748:r      | 0.164 | -0.250 |
| D1 | BNC2      | 14934:3523_37978512:r       | 0.164 | -0.354 |
| D1 | NUP37     | 13161:15589_CL1Contig1:r    | 0.162 | -0.186 |
| D1 | MRPL13    | 2606:18245_CL1Contig1:f     | 0.158 | -0.241 |
| D1 | ATP5C1    | 2323:24161_CL1Contig1:r     | 0.158 | -0.254 |
| D1 | XRN1      | 253:15386_CL2Contig1:f      | 0.157 | -0.183 |
| D1 | TXNL5     | 5252:11730_CL1Contig1:r     | 0.156 | -0.153 |
| D1 | CCT4      | 1150:48_CL2Contig1:r        | 0.156 | -0.249 |
| D1 | EXOSC9    | 11673:5935_CL1Contig1:r     | 0.152 | -0.111 |
| D1 | RHOQ      | 18543:2876_CL6Contig1:f     | 0.151 | -0.451 |

|    |           |                             |        |        |
|----|-----------|-----------------------------|--------|--------|
| D1 | UCRC      | 3721:44889_CL1Contig2:f     | 0.149  | -0.278 |
| D1 | C14orf111 | 697:7493_CL1Contig1:f       | 0.149  | -0.206 |
| D1 | FMNL3     | 11175:1762_CL3Contig1:f     | 0.149  | -0.106 |
| D1 | EIF2S2    | 2201:13007_CL1Contig1:r     | 0.148  | -0.255 |
| D1 | EXOSC8    | 1928:4887_CL1Contig1:r      | 0.143  | -0.375 |
| D1 | BXDC1     | 13025:2130_CL1Contig1:r     | 0.140  | -0.275 |
| D1 | PTH2      | 18692:10575_CL1Contig1:r    | 0.133  | -0.054 |
| D1 | NEIL2     | 12721:28383_CL1Contig1:r    | 0.129  | -0.074 |
| D1 | ARHGDI1A  | TC201186:f                  | 0.119  | -0.167 |
| D1 | PELO      | 14443:25500_CL2Contig1:r    | 0.111  | -0.203 |
| D1 | PHF21A    | 2863:8732_CL1Contig1:f      | 0.106  | -0.065 |
| D1 | SELI      | 31248:10436_15416015:f      | 0.105  | -0.036 |
| D1 | TOM1L1    | 19078:851_CL2Contig1:f      | 0.093  | -0.194 |
| D1 | Pelp1     | 30129:27513_46167899:r      | 0.083  | -0.225 |
| D1 | AGK       | 10375:7496_CL1Contig1:f     | 0.081  | -0.316 |
| D1 | KLRAQ1    | 1914:20443_CL1Contig1:r     | 0.075  | -0.096 |
| D1 | S100A12   | 9817:11373_CL2Contig1:f     | 0.074  | -0.288 |
| D1 | ?         | TC203544:f                  | 0.063  | -0.416 |
| D1 | SLC26A9   | 3386:38776_13309582:f       | 0.058  | -0.094 |
| D1 | ADAM23    | 5646:1006_14658953:r        | 0.030  | -0.197 |
| D1 | C19orf6   | 19000:6466_CL1Contig1:f     | 0.020  | -0.223 |
| D1 | CSNK1E    | 10935:20913_CL5Contig1:r    | 0.018  | -0.221 |
| D1 | DPY30     | 34347:6517_CL1Contig1:r     | 0.011  | -0.339 |
| D1 | P117      | 12213:21141_CL1Contig1:f    | 0.008  | -0.224 |
| D1 | NDUB5     | 12209:22662_CL1Contig1:f    | 0.001  | -0.214 |
| D1 | NDUFS3    | 2878:14088_CL1Contig1:f     | 0.000  | -0.256 |
| D1 | IFIT1     | 8190:4950_CL1Contig1:f      | NA     | 1.016  |
| D1 | ECH1      | 4086:12880_CL1Contig1:r     | -0.018 | -0.262 |
| D1 | CLDN2     | 10222:3846_CL9Contig1:f     | -0.023 | -0.217 |
| D1 | PCBD2     | 11771:7173_CL1Contig1:r     | -0.029 | -0.354 |
| D1 | LOC339977 | 34074:4081_CL1Contig1:r     | -0.054 | -0.257 |
| D1 | PDE7A     | TC225666:f                  | -0.121 | 0.345  |
| D1 | CD1A      | NM_213831.1                 | -0.179 | 0.229  |
| D1 | ETS1      | 9043:32891_CL1Contig1:r     | -0.181 | 0.344  |
| D1 | TRBC1     | 10395:15889_CL2Contig10:f   | -0.213 | 0.160  |
| D1 | IL20RB    | 288:11045_CL1Contig1:f      | -0.253 | 0.135  |
| D1 | FEM1B     | 812:14912_CL1Contig1:f      | -0.269 | 0.064  |
| D1 | H1FX      | 6708:8258_CL1Contig2:r      | -0.300 | 0.099  |
| D1 | NPG4      | NM_213863.1                 | -0.337 | 0.007  |
| D1 | VIM       | 34633:45360_C0007745k17-7:f | -0.361 | 0.309  |
| D1 | CIRBP     | 33275:2811_37794796:f       | -0.495 | 0.278  |
| D1 | CCL5      | 5041:117_CL4Contig1:r       | -1.265 | -0.289 |
| D2 | ?         | TC202102:f                  | -0.141 | 0.516  |
| D2 | AP2S1     | 4148:8745_CL1Contig1:r      | -0.166 | 0.157  |
| D2 | PRCP      | 33069:17107_7843324:f       | -0.193 | 0.168  |
| D2 | GNAI2     | 6955:652_CL1Contig1:f       | -0.197 | 0.051  |
| D2 | ?         | 34546:45360_40406079:f      | -0.225 | 0.373  |
| D2 | ?         | 15730:45360_11503123:f      | -0.231 | 0.369  |
| D2 | MIG3      | 18691:24967_CL1Contig2:f    | -0.259 | 0.040  |
| D2 | ?         | 4205:45360_40392925:r       | -0.268 | 0.058  |
| D2 | Gusb      | 33451:7418_40482422:f       | -0.269 | 0.080  |
| D2 | ?         | 34842:45360_40467715:r      | -0.296 | 0.449  |
| D2 | ?         | 35360:34607_21546426:f      | -0.303 | -0.039 |
| D2 | LY86      | 15147:29060_CL1Contig1:f    | -0.325 | 0.104  |
| D2 | ?         | 14322:45360_59807271:f      | -0.327 | 0.153  |
| D2 | REV3L     | 30347:45360_C0007745h11-3:f | -0.340 | 0.439  |
| D2 | ?         | 30182:16496_51348479:r      | -0.340 | 0.266  |
| D2 | ?         | 34860:45360_40472883:f      | -0.341 | 0.205  |
| D2 | ZNF574    | 4100:20977_CL1Contig2:r     | -0.343 | -0.045 |
| D2 | HLA-DRA   | 34410:2024_CL2Contig1:f     | -0.345 | 0.085  |
| D2 | MPP1      | 10175:1482_CL2Contig1:f     | -0.363 | 0.123  |
| D2 | EEF1G     | 9118:5715_CL1Contig1:r      | -0.363 | -0.017 |
| D2 | ?         | TC236435:r                  | -0.373 | 0.036  |
| D2 | NDUFV2    | TC206031:f                  | -0.378 | 0.530  |
| D2 | LOC643406 | 32989:45360_CL661Contig1:f  | -0.381 | 0.094  |
| D2 | ?         | 34656:45360_40829491:r      | -0.388 | 0.027  |
| D2 | HLA-DMB   | 7088:15487_CL1Contig3:f     | -0.391 | 0.170  |
| D2 | CD9       | 10868:1447_49347123:f       | -0.398 | 0.110  |
| D2 | LOC389342 | 2307:12629_40481805:f       | -0.406 | -0.075 |
| D2 | BHLHE40   | 6835:4615_12008291:r        | -0.407 | -0.038 |
| D2 | ?         | 34426:45360_59822504:f      | -0.410 | 0.234  |
| D2 | ?         | TC210449:f                  | -0.417 | 0.189  |
| D2 | GNAS      | 14089:41223_CL1Contig5:f    | -0.449 | -0.021 |
| D2 | MIC1      | 31716:1836_CL1Contig1:f     | -0.454 | -0.026 |

|    |           |                             |        |        |
|----|-----------|-----------------------------|--------|--------|
| D2 | ?         | 13504:24692_49339578:f      | -0.466 | -0.024 |
| D2 | CD74      | 11833:16274_CL1Contig2:r    | -0.474 | 0.091  |
| D2 | C2orf29   | 16773:16113_CL1Contig1:f    | -0.488 | -0.063 |
| D2 | CEBPD     | 17184:7423_CL1Contig3:f     | -0.544 | -0.023 |
| D2 | HLA-DQB1  | 33766:10014_CL1Contig9:f    | -0.556 | -0.139 |
| D2 | Bem4613   | 35208:32698_51349760:r      | -0.565 | 0.058  |
| D2 | LOC790592 | TC203104:f                  | -0.567 | 0.149  |
| D2 | VIM       | 34633:45360_C0007745k17-7:f | -0.690 | -0.098 |
| D2 | RPS3A     | 3813:7247_CL1Contig2:f      | -0.716 | -0.143 |
| D2 | IL20RB    | 288:11045_CL1Contig1:f      | -0.773 | -0.229 |
| D2 | MT-CYB    | 17635:20951_29287598:r      | -0.949 | -0.073 |
| D3 | Clorf54   | 9758:24019_CL1Contig1:r     | 1.223  | 0.242  |
| D3 | ANG       | 940:12701_CL1Contig1:f      | 1.188  | 0.510  |
| D3 | HSPA1A    | 19776:24927_CL3Contig3:r    | 1.174  | 0.010  |
| D3 | PPBP      | 11474:10930_CL2Contig1:f    | 1.173  | 0.019  |
| D3 | CLEC4E    | 478:45360_CL514Contig1:r    | 1.142  | 0.469  |
| D3 | AVIL      | 11348:3109_41138487:r       | 1.005  | 0.103  |
| D3 | LAMP2     | 17879:1544_CL1Contig1:r     | 0.973  | 0.395  |
| D3 | HK3       | 19012:1489_CL2Contig1:f     | 0.954  | 0.417  |
| D3 | IFI6      | 6641:21023_CL1Contig1:r     | 0.928  | 0.478  |
| D3 | PF4       | 11473:26685_CL1Contig1:f    | 0.894  | -0.034 |
| D3 | DNAJA1    | 11334:7676_CL1Contig3:r     | 0.894  | 0.264  |
| D3 | ?         | TC238171:f                  | 0.865  | 0.147  |
| D3 | ?         | TC226654:f                  | 0.856  | 0.189  |
| D3 | CKB       | 32433:1243_CL1Contig1:f     | 0.855  | 0.076  |
| D3 | FLJ20487  | 9096:16108_CL1Contig2:r     | 0.851  | 0.459  |
| D3 | TPM4      | 11990:44862_CL3Contig1:r    | 0.831  | 0.141  |
| D3 | HSPB1     | 30978:621_CL1Contig1:f      | 0.828  | 0.016  |
| D3 | CCL3L1    | 19552:117_CL3Contig2:f      | 0.813  | 0.073  |
| D3 | LCN2      | 1412:20027_CL1Contig1:r     | 0.808  | 0.019  |
| D3 | ZCCHC6    | 30384:4571_CL1Contig1:r     | 0.780  | 0.205  |
| D3 | BIRC2     | 14134:6750_CL1Contig1:f     | 0.778  | -0.058 |
| D3 | MGC7036   | 3943:35388_CL1Contig1:r     | 0.770  | 0.179  |
| D3 | PRDX6     | 3635:13625_CL1Contig1:r     | 0.746  | 0.001  |
| D3 | LDHA      | 8993:11016_CL2Contig1:f     | 0.734  | -0.026 |
| D3 | HSP90B1   | 19037:6424_CL1Contig1:r     | 0.678  | 0.073  |
| D3 | HIST1H2BM | 7331:795_CL1Contig6:f       | 0.635  | 0.168  |
| D3 | HMG17     | 5858:2829_4717223:f         | 0.630  | 0.028  |
| D3 | ?         | 17255:2829_CL1Contig1:f     | 0.626  | -0.008 |
| D3 | FYB       | 6243:19876_CL1Contig1:f     | 0.614  | 0.144  |
| D3 | PDIA4     | 10447:6018_CL1Contig1:f     | 0.601  | 0.035  |
| D3 | SAMSN1    | 403:2532_CL2Contig1:r       | 0.595  | 0.102  |
| D3 | HSP90AB1  | 7216:6424_CL1Contig2:f      | 0.576  | -0.208 |
| D3 | CD69      | 10823:45360_C0007760d20-7:f | 0.553  | -0.395 |
| D3 | OPTN      | 13759:11780_CL1Contig1:r    | 0.528  | 0.219  |
| D3 | ADRA2B    | TC230424:f                  | 0.517  | -0.046 |
| D3 | LAPTM4A   | 1303:7639_CL1Contig1:f      | 0.503  | -0.006 |
| D3 | MOV10     | 9861:11234_CL1Contig1:f     | 0.500  | 0.134  |
| D3 | ?         | 32927:43374_CL1Contig1:f    | 0.495  | -0.023 |
| D3 | CCDC59    | 18953:27496_CL1Contig1:r    | 0.495  | -0.002 |
| D3 | PTPN12    | 17725:4199_CL2Contig1:f     | 0.486  | -0.125 |
| D3 | MAP2K1IP1 | 11644:10903_CL1Contig1:r    | 0.479  | 0.067  |
| D3 | HNRPA2B1  | 15708:45360_CL40Contig2:r   | 0.475  | -0.088 |
| D3 | SELL      | 3457:7293_CL1Contig1:f      | 0.471  | 0.038  |
| D3 | NFKBIZ    | 1659:5625_49916839:r        | 0.465  | 0.046  |
| D3 | HSPA9     | 11795:24927_CL4Contig1:f    | 0.458  | -0.065 |
| D3 | RHEB      | 20044:32199_CL5Contig1:r    | 0.456  | 0.053  |
| D3 | CFLAR     | 16700:38522_CL1Contig2:r    | 0.448  | 0.016  |
| D3 | ALDH2     | 3681:30973_CL3Contig1:f     | 0.436  | -0.043 |
| D3 | MGST1     | 14055:37319_CL2Contig1:r    | 0.435  | -0.139 |
| D3 | RBM39     | 2173:268_CL1Contig1:f       | 0.425  | -0.078 |
| D3 | CTSC      | 9044:8897_CL2Contig2:f      | 0.400  | -0.045 |
| D3 | GNG10     | 12609:7628_CL1Contig1:f     | 0.398  | -0.154 |
| D3 | TIFA      | 11598:3681_CL1Contig1:f     | 0.397  | 0.054  |
| D3 | MAGOH     | 1857:5371_CL1Contig1:f      | 0.379  | -0.188 |
| D3 | IL8       | 11476:10930_CL3Contig1:r    | 0.364  | -0.005 |
| D3 | UBE2D3    | 11626:45360_CL28Contig5:f   | 0.316  | 0.016  |
| D3 | AHSA1     | 746:3156_CL1Contig1:r       | 0.300  | -0.126 |
| D3 | Cl8orf21  | 7502:12233_CL1Contig1:r     | 0.294  | -0.174 |
| D3 | CSDA      | 14155:2420_CL2Contig2:f     | 0.279  | -0.030 |
| D3 | LOC647908 | 17271:32199_CL2Contig1:r    | 0.260  | -0.261 |
| D3 | CCT2      | 11254:45900_CL3Contig1:r    | 0.260  | -0.227 |
| D3 | EIF1B     | 6786:5901_CL2Contig1:r      | 0.258  | -0.078 |
| D3 | IL2RG     | 13837:6174_CL1Contig1:r     | 0.245  | -0.066 |

|    |           |                             |       |        |
|----|-----------|-----------------------------|-------|--------|
| D3 | PELO      | 14443:25500_CL2Contig1:r    | 0.238 | -0.114 |
| D3 | PRKCQ     | 16653:38019_CL22Contig1:f   | 0.228 | -0.068 |
| D3 | NUDC      | 5872:6291_CL1Contig1:r      | 0.228 | -0.083 |
| D3 | SRI       | 10694:5644_CL1Contig1:f     | 0.226 | -0.134 |
| D3 | SERPINE1  | TC234683:f                  | 0.209 | -0.135 |
| D3 | BCL2L13   | 34829:3874_CL2Contig1:f     | 0.208 | -0.032 |
| D3 | NCBP2     | 42:7386_CL1Contig1:f        | 0.207 | -0.133 |
| D3 | YBX1      | 14534:2420_CL1Contig1:r     | 0.198 | -0.254 |
| D3 | CALCOCO2  | 19595:8525_CL1Contig1:f     | 0.198 | -0.066 |
| D3 | CCT7      | 1570:45900_CL2Contig1:r     | 0.189 | -0.115 |
| D3 | HSP90AB3P | 30593:6424_11502145:r       | 0.180 | -0.077 |
| D3 | ST13      | 11013:8830_CL1Contig1:r     | 0.168 | -0.223 |
| D3 | SERPINI1  | 198:752_CL11Contig1:f       | 0.166 | -0.148 |
| D3 | HMGB2     | 12759:45360_C0007736c05-3:r | 0.150 | -0.176 |
| D3 | SERBP1    | 12626:4853_CL1Contig3:f     | 0.116 | -0.264 |
| D3 | FAM62B    | 15202:30555_CL1Contig1:f    | 0.093 | -0.199 |
